# Supplementary material
Source: publisher site journal article supplement (https://www.dovepress.com/article/100352)
Supplement: Supplementary file 1 [file get_supplementary_file.php]

S1 Table Analyzed transcriptomics parameters of lung tissue of chronic obstructive pulmonary disease rats

| ProbeName     | P-value(B vs A) | FCAbsolute (B vs A) | regulation(B_vs_A) | GeneSymbol | GenbankAccession |
|---------------|-----------------|---------------------|--------------------|------------|------------------|
| A_44_P409518  | 0.0079          | 1.2996              | down               | Gmpr       | NM_057188        |
| A_44_P260580  | 0.0378          | 1.2427              | up                 | Klhl28     | NM_001106735     |
| A_44_P1052387 | 0.0018          | 2.0900              | up                 | Hnrpl1     | XM_233805        |
| A_43_P15466   | 0.0365          | 1.3240              | up                 | Pde5a      | NM_133584        |
| A_44_P728387  | 0.0035          | 1.2634              | up                 |            | AW915320         |
| A_42_P843592  | 0.0143          | 1.1393              | up                 |            |                  |
| A_44_P431092  | 0.0124          | 1.3434              | down               | Cyp2d4     | U48220           |
| A_44_P305636  | 0.0496          | 1.1467              | up                 |            | BP465973         |
| A_44_P177907  | 0.0311          | 1.1157              | down               | Rccd1      | XM_218819        |
| A_44_P913360  | 0.0129          | 1.2963              | up                 |            |                  |
| A_44_P341204  | 0.0167          | 1.3108              | up                 |            | AA997107         |
| A_44_P997174  | 0.0033          | 1.2820              | up                 | Atrx       | NM_001105757     |
| A_42_P776300  | 0.0310          | 1.1275              | up                 |            | BF556698         |
| A_44_P463420  | 0.0180          | 1.3210              | up                 |            | BQ210920         |
| A_44_P521264  | 0.0101          | 1.2583              | up                 |            | AA925252         |
| A_44_P885548  | 0.0469          | 1.2051              | down               |            |                  |
| A_44_P699821  | 0.0151          | 1.5168              | up                 |            |                  |
| A_44_P141475  | 0.0236          | 1.2774              | up                 |            | AI575641         |
| A_44_P492214  | 0.0041          | 1.6816              | down               | Eps813     | NM_001106463     |

|              |        |        |      |              |              |
|--------------|--------|--------|------|--------------|--------------|
| A_43_P22020  | 0.0488 | 1.2176 | up   | Setx         | XM_342400    |
| A_44_P206631 | 0.0205 | 1.2767 | up   |              | BF417274     |
| A_44_P621304 | 0.0007 | 2.0237 | up   |              |              |
| A_44_P377520 | 0.0068 | 1.2952 | up   |              |              |
| A_44_P605838 | 0.0365 | 1.1240 | up   |              |              |
| A_44_P286158 | 0.0022 | 1.4896 | up   |              | XM_226020    |
| A_44_P913962 | 0.0108 | 1.5661 | up   |              |              |
| A_43_P12146  | 0.0058 | 1.9100 | up   | Hnf4a        | NM_022180    |
| A_44_P652585 | 0.0036 | 1.1586 | down | Kdm1         | NM_001130098 |
| A_44_P354150 | 0.0061 | 1.3319 | down | Cep250       | XR_009560    |
| A_44_P516073 | 0.0293 | 1.2854 | down | RGD1310552   | NM_001106838 |
| A_44_P223741 | 0.0192 | 1.3087 | up   |              | AW142694     |
| A_43_P15524  | 0.0096 | 1.2036 | up   | Ccnd3        | NM_012766    |
| A_44_P409820 | 0.0479 | 1.4885 | up   | Faslg        | NM_012908    |
| A_44_P297175 | 0.0076 | 1.5881 | down | Cd36         | NM_031561    |
| A_44_P576228 | 0.0326 | 1.2104 | up   | Orc2l        | BC129076     |
| A_44_P128201 | 0.0158 | 1.5537 | up   |              | U25282       |
| A_44_P343859 | 0.0151 | 1.3893 | up   | Csfl         | NM_023981    |
| A_44_P700744 | 0.0228 | 1.5642 | up   |              |              |
| A_44_P161674 | 0.0065 | 1.4989 | up   | RGD1561150   | XM_001057166 |
| A_44_P489852 | 0.0065 | 1.8517 | up   |              |              |
| A_44_P558018 | 0.0094 | 1.1152 | up   | LOC100364959 | XM_002727692 |

|               |        |        |      |            |              |
|---------------|--------|--------|------|------------|--------------|
| A_43_P16210   | 0.0293 | 1.4070 | up   | Dnah1      | NM_001033655 |
| A_44_P250983  | 0.0288 | 1.3694 | down | Nrbp2      | NM_001135007 |
| A_44_P487627  | 0.0037 | 1.6139 | up   | Zfp217     | NM_001107813 |
| A_44_P323599  | 0.0039 | 1.4641 | up   | RGD1562886 | XM_001068190 |
| A_44_P787936  | 0.0173 | 1.2745 | up   | Stat3      | NM_012747    |
| A_44_P1044517 | 0.0057 | 1.3866 | up   | N4bp1      | XM_214648    |
| A_44_P798113  | 0.0068 | 2.4234 | up   |            |              |
| A_44_P162881  | 0.0031 | 1.3710 | up   |            | BF282012     |
| A_44_P558660  | 0.0312 | 1.3069 | down | Twf1       | NM_001008521 |
| A_44_P527024  | 0.0475 | 1.3104 | down | Col11a2    | NM_212528    |
| A_44_P331065  | 0.0390 | 1.2445 | down |            | XM_002727069 |
| A_44_P289284  | 0.0071 | 1.5181 | up   | Shank1     | NM_031751    |
| A_42_P614175  | 0.0245 | 2.7194 | down | Gal        | NM_033237    |
| A_44_P523016  | 0.0220 | 1.2471 | down | Abhd12     | NM_001024314 |
| A_44_P150137  | 0.0314 | 1.2627 | up   |            | AA924386     |
| A_44_P621785  | 0.0362 | 1.4054 | up   |            | XM_236024    |
| A_44_P542390  | 0.0182 | 1.2112 | down | Ptprs      | NM_019140    |
| A_44_P837006  | 0.0044 | 1.4835 | up   |            |              |
| A_44_P402668  | 0.0472 | 1.3602 | down | Fbxo6      | NM_138917    |
| A_44_P1002141 | 0.0245 | 1.2278 | down | Tsen34     | NM_001006968 |
| A_44_P885330  | 0.0241 | 1.1285 | up   |            |              |
| A_44_P991940  | 0.0030 | 1.8128 | up   |            | XM_225667    |

|                   |        |        |      |                |                  |
|-------------------|--------|--------|------|----------------|------------------|
| A_44_P5532<br>97  | 0.0077 | 1.2251 | down | RGD156068<br>7 | XM_576192        |
| A_43_P1312<br>7   | 0.0392 | 1.6838 | down | Slc38a4        | NM_130748        |
| A_44_P3999<br>92  | 0.0229 | 1.1190 | down | Prkar1a        | NM_013181        |
| A_43_P1327<br>2   | 0.0299 | 1.5449 | down | Agt            | NM_134432        |
| A_44_P2228<br>65  | 0.0078 | 1.1276 | up   |                | XM_235305        |
| A_44_P1603<br>59  | 0.0043 | 1.5426 | up   |                | BM385969         |
| A_44_P3108<br>30  | 0.0025 | 1.9823 | up   |                | AI176154         |
| A_44_P1041<br>279 | 0.0126 | 1.1166 | up   | Usp48          | NM_198785        |
| A_44_P6806<br>22  | 0.0467 | 1.7235 | down | Clspn          | NM_0011066<br>87 |
| A_44_P9982<br>63  | 0.0392 | 1.1636 | up   |                | AA866482         |
| A_44_P4543<br>86  | 0.0073 | 1.9301 | down | Eln            | NM_012722        |
| A_44_P7049<br>47  | 0.0027 | 1.3229 | down |                |                  |
| A_44_P2566<br>94  | 0.0480 | 1.4786 | up   |                | AA859175         |
| A_42_P8314<br>99  | 0.0176 | 1.2881 | down | Egf            | NM_012842        |
| A_44_P9006<br>08  | 0.0104 | 1.4872 | down |                |                  |
| A_44_P6606<br>21  | 0.0302 | 1.2543 | down |                |                  |
| A_43_P1152<br>9   | 0.0187 | 1.3927 | up   | Calcr1         | NM_012717        |
| A_44_P2094<br>61  | 0.0340 | 1.0921 | down | Rab28          | NM_053978        |
| A_43_P1297<br>0   | 0.0179 | 1.1920 | up   | Rere           | NM_053885        |
| A_43_P1696<br>0   | 0.0431 | 1.4760 | up   |                | CB547898         |
| A_42_P4753<br>40  | 0.0258 | 1.1116 | down | Fbxw5          | NM_0010257<br>30 |
| A_44_P4729<br>89  | 0.0453 | 1.7979 | up   | Ptgs2          | S67722           |

|                  |        |        |      |           |                  |
|------------------|--------|--------|------|-----------|------------------|
| A_44_P3639<br>13 | 0.0007 | 1.7960 | up   |           |                  |
| A_43_P2053<br>4  | 0.0368 | 1.1652 | down | Fbxo22    | NM_0010377<br>70 |
| A_44_P5591<br>06 | 0.0499 | 1.0938 | up   | Cct8      | NM_0011058<br>97 |
| A_44_P1016<br>44 | 0.0023 | 1.8160 | up   | Rock2     | NM_013022        |
| A_44_P9144<br>38 | 0.0447 | 1.6689 | down | Cdkn1a    | NM_080782        |
| A_44_P3863<br>49 | 0.0014 | 1.2363 | down | Gpr177    | NM_199408        |
| A_44_P3462<br>09 | 0.0422 | 1.8247 | up   |           | BP490681         |
| A_44_P4405<br>14 | 0.0492 | 1.5893 | up   | RT1-CE4   | NM_0010088<br>42 |
| A_44_P3821<br>94 | 0.0195 | 1.2845 | down | Pbxip1    | NM_0011009<br>76 |
| A_44_P8988<br>05 | 0.0426 | 2.0424 | up   |           |                  |
| A_44_P3369<br>13 | 0.0120 | 1.4380 | up   |           | AA945848         |
| A_44_P4300<br>83 | 0.0343 | 1.2553 | up   | Far2      | XM_575726        |
| A_44_P8530<br>16 | 0.0044 | 1.2231 | up   |           |                  |
| A_42_P4834<br>19 | 0.0159 | 1.2280 | down | Oaz1      | NM_139081        |
| A_44_P5923<br>44 | 0.0034 | 1.5266 | up   | Elmo1     | NM_0011084<br>15 |
| A_42_P7591<br>84 | 0.0206 | 1.1221 | up   |           | XM_341386        |
| A_43_P1524<br>2  | 0.0357 | 1.2063 | up   | Nr3c1     | M14053           |
| A_44_P4590<br>92 | 0.0143 | 1.4759 | up   |           | BX883048         |
| A_44_P6202<br>22 | 0.0155 | 1.2250 | up   | Rb1cc1    | NM_0011079<br>01 |
| A_44_P9152<br>55 | 0.0052 | 1.8670 | up   |           |                  |
| A_44_P3848<br>33 | 0.0002 | 1.5328 | up   | Mum1      | NM_0011087<br>36 |
| A_44_P2060<br>30 | 0.0437 | 1.2535 | down | LOC498369 | XM_0010631<br>81 |

|                   |        |        |      |                |                  |
|-------------------|--------|--------|------|----------------|------------------|
| A_44_P2129<br>22  | 0.0131 | 1.2333 | up   | Zfp329         | NM_0011074<br>77 |
| A_44_P4338<br>94  | 0.0044 | 1.2534 | up   | RGD156082<br>1 | XM_346332        |
| A_44_P8408<br>29  | 0.0383 | 1.1383 | down | Hnrnpr         | NM_175603        |
| A_44_P3403<br>75  | 0.0166 | 1.1308 | down | RGD156420<br>9 | XM_345912        |
| A_44_P7602<br>99  | 0.0150 | 1.7246 | up   |                |                  |
| A_44_P3705<br>68  | 0.0080 | 1.1808 | up   |                | XR_009173        |
| A_44_P3521<br>04  | 0.0162 | 1.3399 | down | Slc25a17       | NM_0011262<br>69 |
| A_44_P4596<br>60  | 0.0189 | 1.7186 | up   |                | XM_0010536<br>57 |
| A_44_P3601<br>79  | 0.0045 | 1.3909 | up   |                | BF283504         |
| A_44_P6995<br>67  | 0.0129 | 1.2713 | down |                |                  |
| A_42_P5543<br>36  | 0.0095 | 1.1537 | down | Secp43         | NM_023027        |
| A_44_P6425<br>47  | 0.0003 | 2.1388 | up   |                | FM113879         |
| A_44_P2433<br>55  | 0.0395 | 1.2418 | down | Atp10a         | NM_0011419<br>35 |
| A_44_P1044<br>934 | 0.0052 | 1.0936 | down | Anapc5         | NM_0010801<br>47 |
| A_44_P3566<br>05  | 0.0276 | 1.1184 | down | Las1l          | NM_0011705<br>90 |
| A_44_P1726<br>45  | 0.0354 | 1.3649 | down | Dclk1          | NM_053343        |
| A_44_P7214<br>39  | 0.0489 | 1.3209 | up   |                | BF418132         |
| A_44_P3813<br>34  | 0.0379 | 1.1266 | up   |                | AI170403         |
| A_44_P4039<br>78  | 0.0044 | 1.2790 | up   | Supt4h1        | NM_0011058<br>28 |
| A_44_P1542<br>45  | 0.0393 | 1.3359 | up   | Atp10d         | XR_009136        |
| A_44_P1004<br>757 | 0.0236 | 1.2806 | down | Serpib10       | NM_153733        |
| A_43_P1605<br>0   | 0.0438 | 1.2697 | down | Wnt11          | NM_080401        |

|                   |        |        |      |           |                  |
|-------------------|--------|--------|------|-----------|------------------|
| A_44_P9749<br>75  | 0.0452 | 1.2983 | up   | LOC307671 | XR_006927        |
| A_44_P3736<br>15  | 0.0432 | 1.3857 | up   |           | AW141787         |
| A_44_P4359<br>96  | 0.0152 | 1.5310 | up   | Slc41a1   | NM_0011088<br>55 |
| A_42_P6845<br>38  | 0.0292 | 1.4254 | down | Slc2a1    | NM_138827        |
| A_43_P2021<br>6   | 0.0240 | 1.3444 | down |           | CB545562         |
| A_44_P3580<br>00  | 0.0100 | 1.5645 | up   |           | AA997517         |
| A_44_P4289<br>88  | 0.0046 | 1.6619 | up   | LOC692017 | XM_0010811<br>33 |
| A_43_P1907<br>7   | 0.0143 | 1.2816 | down | Rptor     | NM_0011344<br>99 |
| A_44_P5139<br>03  | 0.0198 | 1.1932 | up   |           | CB781747         |
| A_44_P8880<br>00  | 0.0389 | 1.4428 | up   |           |                  |
| A_44_P5436<br>19  | 0.0422 | 1.2220 | down | Tmtc4     | NM_0011344<br>14 |
| A_42_P4992<br>82  | 0.0073 | 1.2026 | down | Msrb2     | NM_0010316<br>60 |
| A_44_P7881<br>09  | 0.0021 | 2.1419 | up   |           | AW921078         |
| A_44_P3824<br>23  | 0.0022 | 1.3188 | down | Bnc2      | NM_0011066<br>66 |
| A_44_P3404<br>01  | 0.0112 | 1.4908 | up   |           | XM_235376        |
| A_43_P1306<br>9   | 0.0260 | 1.4138 | up   | Chek1     | NM_080400        |
| A_44_P4551<br>08  | 0.0014 | 1.4218 | up   | Eif1      | NM_0011058<br>37 |
| A_44_P1009<br>892 | 0.0023 | 1.3878 | up   | Pja2      | NM_138896        |
| A_42_P4620<br>15  | 0.0303 | 1.1738 | down | Obfc1     | NM_0010119<br>43 |
| A_44_P5300<br>75  | 0.0471 | 1.2260 | down |           |                  |
| A_42_P6172<br>30  | 0.0270 | 1.2251 | down | Pus1      | NM_0010255<br>63 |
| A_44_P2904<br>36  | 0.0109 | 1.5369 | up   |           | AF189020         |

|               |        |        |      |            |              |
|---------------|--------|--------|------|------------|--------------|
| A_44_P456072  | 0.0259 | 1.2677 | up   | Nipbl      | NM_001106415 |
| A_44_P632322  | 0.0005 | 1.7794 | up   |            | BI395739     |
| A_43_P17180   | 0.0482 | 1.1654 | down | mrpl9      | NM_001007696 |
| A_44_P119251  | 0.0429 | 1.1391 | up   | RGD1306520 | NM_001127485 |
| A_44_P421944  | 0.0083 | 2.0846 | up   | RGD1562724 | XM_225322    |
| A_44_P402705  | 0.0166 | 1.4749 | down | Rab3b      | NM_031091    |
| A_44_P328696  | 0.0449 | 1.4751 | up   |            | XM_234063    |
| A_44_P540855  | 0.0477 | 1.3332 | down | Actn1      | NM_031005    |
| A_44_P293187  | 0.0029 | 1.4028 | up   | RGD1560997 | XM_001053937 |
| A_44_P100716  | 0.0437 | 1.8423 | down | Mylk3      | NM_001110810 |
| A_43_P11301   | 0.0392 | 1.0655 | down |            |              |
| A_44_P806046  | 0.0314 | 1.2171 | up   |            |              |
| A_43_P19318   | 0.0029 | 1.2237 | down | Cdk9       | NM_001007743 |
| A_44_P218147  | 0.0217 | 1.2488 | down | Tmed1      | NM_001013432 |
| A_44_P839920  | 0.0315 | 1.2321 | up   | Bcor1      | XM_217627    |
| A_44_P700424  | 0.0384 | 1.2741 | up   |            |              |
| A_43_P14032   | 0.0267 | 1.2491 | down | Lrrc61     | NM_001109231 |
| A_44_P474037  | 0.0423 | 1.2648 | down | Igflr      | NM_052807    |
| A_42_P720077  | 0.0180 | 1.7646 | down | Fmo5       | NM_144739    |
| A_43_P17262   | 0.0199 | 1.2858 | down | Tmod4      | NM_001106449 |
| A_44_P1045105 | 0.0453 | 1.1655 | down |            | XM_218427    |
| A_44_P1015041 | 0.0285 | 1.4710 | down |            | AI234012     |



|                  |        |        |      |         |                  |
|------------------|--------|--------|------|---------|------------------|
| A_44_P3707<br>98 | 0.0192 | 1.1522 | down |         | XM_343271        |
| A_43_P1521<br>6  | 0.0187 | 2.3238 | up   | Dolpp1  | NM_0011065<br>67 |
| A_44_P5527<br>51 | 0.0024 | 2.3568 | up   |         | M95791           |
| A_44_P3344<br>91 | 0.0171 | 1.3368 | down |         | AW525042         |
| A_44_P4354<br>22 | 0.0024 | 1.5084 | up   | Mef2a   | NM_0010140<br>35 |
| A_44_P2425<br>88 | 0.0082 | 1.2736 | up   |         | BG666662         |
| A_44_P1605<br>68 | 0.0268 | 1.2746 | up   | Trib2   | NM_0011080<br>15 |
| A_44_P8175<br>39 | 0.0165 | 1.7179 | up   | Caprin1 | NM_0010121<br>85 |
| A_44_P4468<br>82 | 0.0289 | 1.2493 | down | Abcb6   | NM_080582        |
| A_44_P4512<br>57 | 0.0193 | 1.3901 | up   |         | AI409922         |
| A_44_P3894<br>44 | 0.0276 | 1.4936 | up   |         | AF327071         |
| A_44_P5291<br>92 | 0.0181 | 1.4415 | up   |         | AA964625         |
| A_44_P5602<br>85 | 0.0016 | 2.0411 | up   |         | XR_086661        |
| A_44_P2384<br>95 | 0.0263 | 1.5748 | up   | Sptbn1  | AJ242018         |
| A_44_P2343<br>44 | 0.0428 | 1.3374 | down |         | XM_0010656<br>10 |
| A_44_P1382<br>30 | 0.0282 | 1.3121 | up   |         | XM_236238        |
| A_44_P2217<br>96 | 0.0375 | 1.1139 | down |         | CV119755         |
| A_42_P6954<br>01 | 0.0253 | 2.0241 | up   | Ccl2    | NM_031530        |
| A_44_P2815<br>49 | 0.0463 | 1.7680 | down |         | XM_0010672<br>41 |
| A_44_P2736<br>91 | 0.0280 | 1.3706 | up   |         | BF284294         |
| A_44_P5464<br>32 | 0.0354 | 1.7056 | up   |         |                  |
| A_44_P3657<br>65 | 0.0186 | 1.2181 | down | Slmap   | NM_0011060<br>60 |

|                  |        |        |      |                |                  |
|------------------|--------|--------|------|----------------|------------------|
| A_44_P6235<br>60 | 0.0357 | 2.0584 | up   |                |                  |
| A_44_P6534<br>93 | 0.0046 | 1.4970 | up   |                |                  |
| A_44_P4344<br>28 | 0.0238 | 1.4744 | up   |                | BF395191         |
| A_44_P6514<br>16 | 0.0321 | 1.2856 | up   |                | BF291245         |
| A_42_P5026<br>71 | 0.0271 | 1.1329 | up   | Znrf1          | NM_0011086<br>28 |
| A_44_P2548<br>55 | 0.0016 | 1.5093 | up   | Usp33          | BC092624         |
| A_44_P7298<br>22 | 0.0287 | 1.1451 | up   |                |                  |
| A_44_P1440<br>93 | 0.0412 | 1.1279 | up   |                | AI178292         |
| A_44_P5929<br>73 | 0.0439 | 1.1980 | up   |                | BF564892         |
| A_44_P3732<br>72 | 0.0075 | 1.3819 | down | Prodh          | NM_0011357<br>78 |
| A_44_P4562<br>56 | 0.0057 | 1.4588 | up   |                | AA925161         |
| A_44_P5161<br>15 | 0.0294 | 1.2510 | up   | RGD156626<br>4 | XM_345884        |
| A_44_P2368<br>06 | 0.0177 | 1.1796 | down | Ggal           | NM_0010119<br>94 |
| A_44_P2675<br>01 | 0.0047 | 1.3182 | up   | RGD131135<br>8 | NM_0010174<br>48 |
| A_44_P5594<br>13 | 0.0058 | 1.6027 | up   | Nup153         | AA818240         |
| A_44_P3295<br>43 | 0.0033 | 1.4183 | up   |                | AA894101         |
| A_44_P2522<br>50 | 0.0461 | 1.6554 | up   |                | BE102840         |
| A_44_P1107<br>88 | 0.0451 | 1.3420 | up   | Itgad          | NM_031691        |
| A_44_P9136<br>44 | 0.0192 | 1.2861 | up   |                |                  |
| A_43_P1085<br>1  | 0.0320 | 1.1091 | up   | Sh3glb1        | NM_0010119<br>29 |
| A_44_P7321<br>50 | 0.0029 | 1.7911 | up   |                |                  |
| A_44_P9149<br>45 | 0.0282 | 1.1669 | up   | Zfp84          | NM_0011075<br>00 |

|                   |        |        |      |                |                  |
|-------------------|--------|--------|------|----------------|------------------|
| A_44_P5456<br>49  | 0.0350 | 1.1572 | down | Parp16         | NM_0010140<br>93 |
| A_44_P9437<br>56  | 0.0411 | 1.2849 | up   | Ccdc82         | NM_0010076<br>60 |
| A_44_P3378<br>65  | 0.0123 | 1.3224 | up   |                |                  |
| A_44_P5529<br>58  | 0.0396 | 1.5725 | up   |                | XM_344237        |
| A_44_P2686<br>10  | 0.0245 | 1.1042 | down | RGD155989<br>6 | NM_0011091<br>34 |
| A_44_P3002<br>49  | 0.0207 | 1.3532 | up   |                |                  |
| A_44_P5926<br>52  | 0.0037 | 1.7621 | up   |                | XM_0010795<br>37 |
| A_44_P4685<br>19  | 0.0046 | 1.8605 | up   | Papolb         | NM_0010120<br>20 |
| A_43_P1099<br>6   | 0.0228 | 1.3082 | down | Atp1b2         | NM_012507        |
| A_44_P3687<br>15  | 0.0370 | 1.2305 | up   |                | BE106382         |
| A_44_P1228<br>41  | 0.0190 | 1.2689 | up   |                | AI178484         |
| A_43_P1322<br>6   | 0.0028 | 1.4730 | up   | Slc31a1        | NM_133600        |
| A_44_P1831<br>42  | 0.0031 | 1.4525 | up   |                | XM_343286        |
| A_44_P3141<br>52  | 0.0022 | 1.3081 | up   | RGD156131<br>7 | XM_345433        |
| A_44_P5476<br>35  | 0.0129 | 1.3636 | up   |                | BM392213         |
| A_44_P1392<br>11  | 0.0347 | 1.1731 | up   |                | AA925900         |
| A_44_P3650<br>12  | 0.0133 | 2.4580 | up   |                | AI103325         |
| A_44_P1059<br>84  | 0.0336 | 1.2018 | up   |                | BF406511         |
| A_44_P1060<br>170 | 0.0064 | 1.4231 | down | Vps33a         | NM_022961        |
| A_44_P1583<br>78  | 0.0246 | 1.2943 | up   |                | AI639455         |
| A_44_P3039<br>72  | 0.0082 | 1.5544 | up   |                | BE116157         |
| A_44_P4158<br>07  | 0.0249 | 1.2680 | down |                | AA955172         |

|                   |        |        |      |         |                  |
|-------------------|--------|--------|------|---------|------------------|
| A_44_P2168<br>30  | 0.0483 | 1.2620 | up   |         | AA892759         |
| A_44_P5146<br>90  | 0.0106 | 2.2899 | up   |         | CV797051         |
| A_44_P2769<br>32  | 0.0145 | 1.3475 | up   |         |                  |
| A_43_P1664<br>1   | 0.0376 | 1.0969 | down | Snapap  | NM_0010256<br>48 |
| A_44_P4533<br>11  | 0.0444 | 1.3141 | up   |         | BF388434         |
| A_43_P1633<br>1   | 0.0357 | 1.1791 | up   | Znf569  | U78133           |
| A_44_P5386<br>58  | 0.0038 | 1.4538 | down | Slc7a7  | NM_031341        |
| A_44_P9803<br>53  | 0.0353 | 1.1767 | down | Trim2   | NM_0011085<br>52 |
| A_44_P7256<br>17  | 0.0304 | 1.0945 | down |         | BF548107         |
| A_44_P2006<br>61  | 0.0285 | 1.1881 | up   |         | CV110871         |
| A_44_P6141<br>54  | 0.0178 | 1.6133 | down |         | BE110237         |
| A_44_P1015<br>355 | 0.0038 | 1.4014 | up   | Rnmt    | NM_0010082<br>99 |
| A_44_P3555<br>52  | 0.0085 | 1.3235 | up   |         | BF548081         |
| A_43_P2304<br>6   | 0.0434 | 1.1212 | down | Ccdc163 | NM_0010256<br>56 |
| A_44_P4584<br>94  | 0.0064 | 1.2246 | up   |         | AA924972         |
| A_44_P2936<br>67  | 0.0484 | 1.2975 | down | Vps33b  | NM_022286        |
| A_44_P1779<br>69  | 0.0263 | 1.1637 | down | Rhbdd3  | NM_0010138<br>75 |
| A_44_P1488<br>65  | 0.0349 | 1.1922 | down | Homer1  | NM_031707        |
| A_44_P1028<br>233 | 0.0206 | 1.0876 | down | Anapc2  | NM_0011005<br>32 |
| A_44_P5156<br>27  | 0.0392 | 1.9156 | up   | Igj     | BC097960         |
| A_44_P5219<br>46  | 0.0138 | 1.2193 | up   |         | AA850244         |
| A_44_P4703<br>61  | 0.0062 | 1.2772 | up   |         | CK363737         |

|                  |        |        |      |                |                  |
|------------------|--------|--------|------|----------------|------------------|
| A_44_P8065<br>72 | 0.0010 | 1.4971 | up   |                |                  |
| A_44_P2897<br>58 | 0.0069 | 1.5793 | up   |                | AW535083         |
| A_44_P1404<br>49 | 0.0069 | 1.2075 | down | Grhpr          | NM_0011137<br>54 |
| A_44_P1345<br>61 | 0.0066 | 1.4049 | down | Aifm2          | NM_0011394<br>83 |
| A_44_P2206<br>10 | 0.0356 | 1.2479 | down | Fahd1          | NM_0010249<br>91 |
| A_44_P1918<br>38 | 0.0275 | 1.2811 | down |                | AF352175         |
| A_42_P7015<br>82 | 0.0005 | 1.2284 | down | Gstt1          | NM_053293        |
| A_44_P3210<br>75 | 0.0311 | 1.2030 | down | Rasal2         | NM_0011071<br>88 |
| A_44_P4779<br>54 | 0.0001 | 3.0451 | up   | RGD156184<br>3 | XM_0027254<br>53 |
| A_44_P1958<br>81 | 0.0020 | 1.1229 | down |                | FM122807         |
| A_44_P4881<br>53 | 0.0308 | 1.4705 | up   |                | AA866303         |
| A_44_P2493<br>91 | 0.0056 | 1.1743 | down | Traf7          | NM_0011275<br>48 |
| A_44_P9581<br>39 | 0.0173 | 1.3794 | down |                | AW917167         |
| A_44_P2777<br>19 | 0.0056 | 1.5653 | up   |                | BF393654         |
| A_44_P1402<br>66 | 0.0097 | 1.1517 | up   | Slc22a15       | NM_0011077<br>07 |
| A_43_P1255<br>2  | 0.0176 | 1.3354 | down | Ocln           | NM_031329        |
| A_44_P5717<br>23 | 0.0209 | 1.4247 | up   |                | AW531135         |
| A_44_P1820<br>61 | 0.0321 | 1.2406 | down | Trappc2        | NM_0010249<br>65 |
| A_43_P2114<br>3  | 0.0139 | 1.2757 | down | Cul3           | NM_0011069<br>23 |
| A_44_P6666<br>11 | 0.0171 | 1.1935 | up   |                | AW917482         |
| A_44_P4021<br>93 | 0.0308 | 1.3788 | up   |                | BQ193921         |
| A_44_P1083<br>04 | 0.0124 | 1.8740 | up   | Slc41a2        | NM_0011087<br>42 |

|                  |        |        |      |                  |                  |
|------------------|--------|--------|------|------------------|------------------|
| A_44_P1843<br>63 | 0.0159 | 1.4083 | down | Cand2            | NM_181362        |
| A_44_P4903<br>58 | 0.0239 | 1.2966 | up   |                  | AI411577         |
| A_44_P8015<br>16 | 0.0427 | 1.4295 | up   |                  | BF412188         |
| A_44_P2993<br>80 | 0.0269 | 1.5063 | up   | Olr1416          | NM_0010000<br>09 |
| A_44_P1659<br>38 | 0.0313 | 1.2756 | down | Sumf2            | NM_0010251<br>25 |
| A_44_P1300<br>08 | 0.0033 | 1.5864 | up   |                  | AA899509         |
| A_44_P4089<br>84 | 0.0169 | 1.5291 | up   |                  | AW055729         |
| A_44_P5032<br>15 | 0.0210 | 1.2569 | down |                  | AA799326         |
| A_44_P4744<br>83 | 0.0319 | 1.3671 | up   |                  | BE104073         |
| A_44_P6543<br>47 | 0.0329 | 1.3108 | up   |                  |                  |
| A_43_P1097<br>0  | 0.0436 | 1.2442 | up   | Map3k3           | NM_0011070<br>58 |
| A_44_P3073<br>08 | 0.0224 | 1.3684 | up   | LOC301725        | XM_237568        |
| A_42_P4600<br>21 | 0.0224 | 1.3039 | down | Adcy10           | NM_021684        |
| A_44_P9485<br>72 | 0.0099 | 1.2584 | down | Ccnc             | NM_0011004<br>72 |
| A_44_P4620<br>18 | 0.0008 | 1.2935 | up   | LOC100360<br>990 | XM_0027267<br>00 |
| A_44_P7299<br>26 | 0.0246 | 1.1933 | up   |                  | AA957540         |
| A_44_P8759<br>45 | 0.0208 | 1.7737 | up   |                  | BI296619         |
| A_44_P3508<br>88 | 0.0226 | 1.5101 | up   |                  | AA957004         |
| A_44_P1127<br>74 | 0.0213 | 1.6862 | up   |                  | BE119177         |
| A_44_P7216<br>33 | 0.0072 | 1.3679 | up   |                  |                  |
| A_44_P2193<br>22 | 0.0387 | 1.3127 | down |                  | BC091431         |
| A_44_P4725<br>83 | 0.0013 | 1.8250 | up   |                  | AW914016         |

|                   |        |        |      |           |                  |
|-------------------|--------|--------|------|-----------|------------------|
| A_44_P3272<br>50  | 0.0417 | 1.2260 | down | Kctd13    | NM_198736        |
| A_44_P2531<br>12  | 0.0053 | 1.1372 | down | Pfdn1     | NM_0011084<br>27 |
| A_44_P1053<br>772 | 0.0457 | 1.1809 | down | Galt      | NM_0010130<br>89 |
| A_44_P3765<br>92  | 0.0382 | 1.2050 | up   |           | AI411616         |
| A_44_P1408<br>05  | 0.0067 | 1.1351 | down | LOC361100 | NM_0011008<br>58 |
| A_44_P7403<br>24  | 0.0005 | 1.5618 | up   |           | AI044170         |
| A_44_P7260<br>50  | 0.0005 | 1.3993 | up   |           | BF565756         |
| A_44_P2664<br>54  | 0.0256 | 1.2142 | down | Rnf181    | NM_0010076<br>47 |
| A_43_P1255<br>9   | 0.0012 | 1.8688 | up   | Camkk2    | NM_031338        |
| A_44_P3400<br>88  | 0.0010 | 1.3273 | up   | Usp4      | NM_0011350<br>12 |
| A_44_P3929<br>88  | 0.0035 | 1.9323 | up   |           | AA957290         |
| A_44_P4341<br>77  | 0.0025 | 1.6327 | up   |           | AI227710         |
| A_44_P1206<br>08  | 0.0066 | 1.4197 | up   |           | AA924066         |
| A_44_P1079<br>49  | 0.0373 | 1.1819 | down | Dnajc11   | NM_0011086<br>94 |
| A_44_P5337<br>94  | 0.0164 | 1.6056 | up   | Tnfrsf1b  | NM_130426        |
| A_43_P1700<br>8   | 0.0197 | 1.4214 | down | Bpgm      | NM_199382        |
| A_44_P7033<br>94  | 0.0180 | 1.7956 | down |           |                  |
| A_44_P4275<br>60  | 0.0158 | 1.2008 | up   | Pom121    | NM_053622        |
| A_42_P8157<br>27  | 0.0149 | 1.1132 | down | Usp48     | NM_198785        |
| A_44_P9093<br>24  | 0.0348 | 1.2264 | up   |           | AA925918         |
| A_42_P7127<br>77  | 0.0396 | 1.2252 | down | Cabin1    | NM_053575        |
| A_44_P1055<br>66  | 0.0281 | 1.3341 | up   |           |                  |

|                   |        |        |      |                |                  |
|-------------------|--------|--------|------|----------------|------------------|
| A_44_P2985<br>33  | 0.0048 | 1.3016 | up   |                | AA963238         |
| A_44_P2541<br>44  | 0.0246 | 1.1123 | down | Aftph          | XM_223651        |
| A_44_P5243<br>59  | 0.0405 | 1.1566 | down | Anxa1          | NM_012904        |
| A_44_P1047<br>315 | 0.0425 | 1.2715 | down | Lynx1          | NM_0011305<br>46 |
| A_43_P1892<br>0   | 0.0140 | 1.1780 | up   | Ercc8          | NM_0011076<br>50 |
| A_44_P4993<br>72  | 0.0063 | 2.2735 | up   | Brwd3          | XM_228518        |
| A_44_P4293<br>79  | 0.0016 | 1.6586 | up   | RGD156426<br>8 | XM_0010729<br>62 |
| A_44_P9947<br>68  | 0.0243 | 1.1341 | up   | Ssr3           | NM_031120        |
| A_44_P3165<br>61  | 0.0169 | 1.0834 | down | Serf2          | NM_0010987<br>82 |
| A_44_P4223<br>98  | 0.0005 | 1.4308 | up   |                | BQ201255         |
| A_44_P4901<br>07  | 0.0023 | 1.3393 | up   |                |                  |
| A_44_P7606<br>28  | 0.0091 | 1.4041 | up   |                |                  |
| A_44_P6367<br>69  | 0.0478 | 1.2844 | up   |                |                  |
| A_44_P3238<br>92  | 0.0023 | 1.6815 | up   | RGD155995<br>1 | XM_228717        |
| A_44_P3226<br>51  | 0.0312 | 1.3639 | up   |                | AI145695         |
| A_44_P1003<br>233 | 0.0372 | 1.2653 | up   |                | AW143803         |
| A_44_P2900<br>74  | 0.0460 | 1.2158 | up   |                | AI575097         |
| A_44_P4971<br>74  | 0.0493 | 1.2238 | down | Gramd1b        | XM_217113        |
| A_44_P3506<br>46  | 0.0158 | 3.4138 | up   |                | AI029858         |
| A_44_P3063<br>16  | 0.0490 | 1.1848 | down | Elac2          | NM_172326        |
| A_44_P5449<br>74  | 0.0239 | 1.2620 | up   | Mki67ip        | NM_139186        |
| A_44_P3793<br>31  | 0.0456 | 1.0889 | up   | LOC257642      | NM_147136        |



|                   |        |        |      |                |                  |
|-------------------|--------|--------|------|----------------|------------------|
| A_44_P3655<br>31  | 0.0429 | 1.2818 | down | Hsd17b4        | NM_024392        |
| A_44_P1148<br>69  | 0.0380 | 1.1448 | down | Ftl            | NM_022500        |
| A_44_P7606<br>97  | 0.0137 | 1.2002 | down | Nhej1          | NM_0010142<br>17 |
| A_44_P3720<br>49  | 0.0457 | 1.2685 | up   |                | AA900032         |
| A_44_P2091<br>41  | 0.0447 | 1.2580 | up   |                | AI599996         |
| A_44_P5035<br>52  | 0.0272 | 1.3087 | down | Macrodl        | NM_139337        |
| A_44_P5520<br>31  | 0.0021 | 1.6238 | up   |                | BQ208511         |
| A_44_P1008<br>845 | 0.0044 | 1.3172 | up   |                |                  |
| A_44_P8617<br>38  | 0.0185 | 1.4717 | up   |                |                  |
| A_44_P1595<br>40  | 0.0292 | 1.2578 | down | Dhrs11         | NM_0010141<br>19 |
| A_44_P9210<br>80  | 0.0439 | 1.2172 | down |                | CO401386         |
| A_44_P9217<br>10  | 0.0358 | 1.1713 | up   |                |                  |
| A_44_P1995<br>14  | 0.0183 | 1.1499 | down | Thap4          | NM_0010055<br>64 |
| A_44_P4544<br>50  | 0.0256 | 1.5708 | up   |                | AB072241         |
| A_44_P4148<br>60  | 0.0429 | 1.4187 | up   |                | XM_345276        |
| A_44_P2910<br>60  | 0.0471 | 1.2097 | down | Med16          | NM_0011067<br>68 |
| A_44_P1057<br>602 | 0.0201 | 1.2787 | up   | Ercc6          | NM_0011072<br>96 |
| A_44_P6216<br>33  | 0.0182 | 1.2888 | down | Dhrs3          | NM_0010371<br>99 |
| A_43_P2328<br>8   | 0.0347 | 1.4806 | up   | RGD156251<br>5 | NM_0011092<br>42 |
| A_44_P3867<br>99  | 0.0008 | 1.3330 | up   | Nudt9          | NM_0010069<br>91 |
| A_44_P1003<br>072 | 0.0109 | 1.3033 | up   | Dusp11         | NM_0010256<br>50 |
| A_43_P1240<br>4   | 0.0002 | 1.4018 | up   | Evl            | NM_024147        |

|                   |        |        |      |                |                  |
|-------------------|--------|--------|------|----------------|------------------|
| A_44_P2730<br>97  | 0.0167 | 1.6691 | up   |                | AI011686         |
| A_42_P6366<br>27  | 0.0099 | 2.7580 | down | Cartpt         | NM_017110        |
| A_44_P5161<br>66  | 0.0210 | 1.3419 | down |                |                  |
| A_44_P3195<br>82  | 0.0061 | 1.1394 | up   |                | XM_0010719<br>89 |
| A_44_P2088<br>49  | 0.0447 | 1.3071 | down | Dnal4          | NM_0010096<br>66 |
| A_44_P3929<br>91  | 0.0072 | 1.2962 | up   |                | AI175447         |
| A_44_P7144<br>09  | 0.0159 | 1.0797 | up   | Sfrs3          | NM_0010479<br>07 |
| A_44_P4709<br>18  | 0.0466 | 1.7425 | up   |                | XM_219425        |
| A_44_P3565<br>79  | 0.0118 | 1.2625 | down | Ermp1          | NM_184050        |
| A_43_P2079<br>4   | 0.0252 | 1.6110 | down | Osbp15         | NM_0010150<br>24 |
| A_43_P2306<br>8   | 0.0329 | 1.3890 | up   | Fbx12          | XM_343495        |
| A_44_P6378<br>56  | 0.0485 | 1.1224 | down |                |                  |
| A_44_P5035<br>79  | 0.0279 | 1.1936 | up   | Rpl17          | NM_201415        |
| A_44_P2836<br>88  | 0.0023 | 1.1983 | up   | RGD156093<br>6 | XM_219309        |
| A_44_P5060<br>64  | 0.0422 | 1.3205 | up   | Aldh112        | XM_235005        |
| A_43_P1675<br>0   | 0.0332 | 1.3312 | down | Prodh          | NM_0011357<br>78 |
| A_44_P2109<br>52  | 0.0152 | 1.2741 | up   |                | XR_009547        |
| A_43_P1008<br>1   | 0.0430 | 1.3002 | down | Aadacl1        | NM_0011275<br>24 |
| A_44_P1870<br>75  | 0.0039 | 2.0754 | up   |                | S63519           |
| A_42_P8241<br>78  | 0.0407 | 1.2781 | down | Slc25a1        | NM_017307        |
| A_44_P5335<br>60  | 0.0009 | 1.2491 | down | Fxn            | XM_574642        |
| A_44_P1013<br>163 | 0.0040 | 1.6527 | down | Clybl          | NM_0011006<br>85 |

|                   |        |        |      |                |                  |
|-------------------|--------|--------|------|----------------|------------------|
| A_44_P1827<br>21  | 0.0062 | 1.4900 | up   | RGD156277<br>6 | XM_223623        |
| A_44_P2196<br>64  | 0.0320 | 1.2039 | down | Acat1          | NM_017075        |
| A_44_P1407<br>20  | 0.0210 | 1.2205 | down |                | AA899797         |
| A_44_P9293<br>21  | 0.0021 | 2.1232 | up   |                |                  |
| A_44_P1851<br>38  | 0.0370 | 1.1421 | up   |                |                  |
| A_44_P1027<br>493 | 0.0093 | 1.6632 | up   | Lix11          | NM_0010243<br>03 |
| A_44_P5547<br>38  | 0.0388 | 1.1404 | down |                | BU759649         |
| A_42_P4865<br>17  | 0.0403 | 1.1021 | down | Cox7a2l        | NM_0011067<br>04 |
| A_42_P5457<br>21  | 0.0028 | 1.2384 | up   |                | BF555033         |
| A_44_P2155<br>44  | 0.0068 | 1.5939 | up   | RGD156592<br>0 | XM_344713        |
| A_43_P1015<br>7   | 0.0188 | 1.2586 | down | Spire1         | NM_0011073<br>81 |
| A_44_P9593<br>69  | 0.0015 | 1.6672 | up   |                |                  |
| A_43_P1491<br>0   | 0.0141 | 1.3111 | down | Ddc            | NM_012545        |
| A_44_P2794<br>38  | 0.0436 | 1.2597 | up   |                | AW526164         |
| A_44_P1057<br>70  | 0.0227 | 1.2844 | up   |                | BI291605         |
| A_44_P1007<br>385 | 0.0387 | 1.1828 | up   |                | BG671304         |
| A_44_P4344<br>62  | 0.0305 | 1.2133 | down | Pemt           | NM_013003        |
| A_43_P1116<br>6   | 0.0364 | 1.1011 | down | RGD130727<br>9 | NM_0010083<br>43 |
| A_44_P7159<br>94  | 0.0423 | 1.3602 | up   |                |                  |
| A_44_P8088<br>45  | 0.0494 | 1.1614 | up   |                |                  |
| A_44_P3709<br>53  | 0.0203 | 1.2384 | up   |                | BI289486         |
| A_44_P2578<br>32  | 0.0361 | 1.1747 | down | Farp1          | NM_0011072<br>87 |

|                   |        |        |      |        |                  |
|-------------------|--------|--------|------|--------|------------------|
| A_44_P7012<br>36  | 0.0129 | 1.4399 | up   |        |                  |
| A_42_P8001<br>63  | 0.0387 | 1.1272 | up   | Rpl23a | NM_0011082<br>83 |
| A_44_P1002<br>440 | 0.0212 | 1.3793 | up   | Xrn1   | XM_217233        |
| A_44_P3360<br>54  | 0.0125 | 1.3815 | up   |        | AA899896         |
| A_43_P1476<br>0   | 0.0396 | 1.2694 | up   |        |                  |
| A_44_P2744<br>14  | 0.0202 | 1.4548 | up   |        |                  |
| A_42_P4956<br>91  | 0.0343 | 1.1065 | down | Bcl7c  | NM_0011062<br>98 |
| A_44_P1210<br>51  | 0.0267 | 1.1099 | up   | Rpl17  | NM_201415        |
| A_44_P5548<br>24  | 0.0029 | 1.2760 | up   |        | AI169703         |
| A_44_P6530<br>74  | 0.0018 | 1.3818 | up   |        |                  |
| A_44_P2543<br>05  | 0.0350 | 1.3096 | up   |        | S74331           |
| A_44_P4609<br>28  | 0.0292 | 1.5851 | up   |        | BI295823         |
| A_42_P6128<br>34  | 0.0478 | 1.1860 | up   | Tmem93 | NM_0011058<br>06 |
| A_42_P7718<br>48  | 0.0381 | 1.2044 | down | Eif4b  | NM_0010083<br>24 |
| A_44_P1146<br>06  | 0.0029 | 1.5514 | up   |        | XR_009316        |
| A_44_P4502<br>78  | 0.0022 | 1.3429 | up   |        |                  |
| A_42_P6302<br>49  | 0.0342 | 1.0986 | up   | Ctcf   | NM_031824        |
| A_44_P5052<br>82  | 0.0466 | 1.1968 | down | Coq7   | NM_012785        |
| A_44_P3798<br>78  | 0.0107 | 1.3857 | down | Fbxo34 | NM_0011072<br>57 |
| A_44_P3910<br>35  | 0.0189 | 1.2972 | up   | Giot1  | NM_133563        |
| A_44_P4619<br>32  | 0.0010 | 1.1975 | up   |        | XM_228533        |
| A_43_P1487<br>2   | 0.0405 | 1.1214 | down | Sdc1   | NM_013026        |

|                   |        |        |      |        |                  |
|-------------------|--------|--------|------|--------|------------------|
| A_44_P4772<br>86  | 0.0095 | 1.6197 | up   |        | DV719188         |
| A_44_P1412<br>88  | 0.0119 | 1.1119 | down | Rab34  | NM_0010121<br>40 |
| A_42_P6184<br>14  | 0.0437 | 1.1413 | down | Mto1   | NM_0011068<br>41 |
| A_43_P2191<br>3   | 0.0445 | 1.2879 | down | Usp53  | NM_0011064<br>68 |
| A_44_P2474<br>11  | 0.0414 | 1.1513 | up   | Pds5b  | NM_0011023<br>83 |
| A_42_P5062<br>73  | 0.0275 | 1.3696 | up   | Csad   | NM_021750        |
| A_44_P5041<br>20  | 0.0453 | 1.4742 | down | Crocc  | NM_0011079<br>90 |
| A_44_P3403<br>45  | 0.0019 | 2.0668 | up   | Rpl10l | XM_234245        |
| A_44_P2084<br>15  | 0.0306 | 1.1803 | down |        | XM_223330        |
| A_44_P3860<br>99  | 0.0407 | 1.1546 | up   |        | AI175475         |
| A_43_P1175<br>9   | 0.0065 | 2.0471 | up   | Rps26  | NM_013224        |
| A_44_P1102<br>21  | 0.0477 | 1.7461 | down |        | XM_0010672<br>41 |
| A_44_P3628<br>23  | 0.0342 | 1.1989 | up   |        | AW140970         |
| A_44_P1515<br>82  | 0.0395 | 1.3085 | down | Il17re | NM_0010040<br>91 |
| A_44_P4689<br>49  | 0.0382 | 1.1155 | down | Vps13d | NM_0011080<br>06 |
| A_44_P7908<br>25  | 0.0052 | 1.1986 | up   |        |                  |
| A_44_P9324<br>24  | 0.0379 | 1.2617 | down |        |                  |
| A_44_P1618<br>99  | 0.0234 | 1.6934 | up   |        | AA858924         |
| A_44_P4715<br>24  | 0.0488 | 1.2353 | up   |        | BF410771         |
| A_43_P2212<br>6   | 0.0363 | 1.2656 | down | Ptcd1  | NM_0011096<br>65 |
| A_44_P1376<br>33  | 0.0406 | 1.4028 | down | Adora1 | Y12519           |
| A_44_P1060<br>108 | 0.0143 | 1.3561 | up   | Tmsb10 | NM_021261        |

|                   |        |        |      |                |                  |
|-------------------|--------|--------|------|----------------|------------------|
| A_44_P4363<br>51  | 0.0244 | 1.3057 | down | Taf51          | NM_0011074<br>42 |
| A_44_P7896<br>73  | 0.0159 | 1.3099 | up   |                | AI177494         |
| A_44_P1060<br>167 | 0.0059 | 1.5009 | down | Vps33a         | NM_022961        |
| A_44_P2252<br>39  | 0.0119 | 1.5091 | up   |                | XM_345962        |
| A_44_P1042<br>940 | 0.0492 | 1.2905 | up   |                |                  |
| A_44_P1774<br>65  | 0.0448 | 1.3494 | down | Gas7           | AJ131902         |
| A_44_P3950<br>20  | 0.0037 | 1.5812 | up   |                | AI407351         |
| A_44_P2779<br>35  | 0.0427 | 1.2009 | up   | Arid1a         | NM_0011066<br>35 |
| A_44_P4195<br>28  | 0.0234 | 1.3473 | up   | Cdkn2aip       | NM_0010140<br>00 |
| A_44_P2509<br>88  | 0.0223 | 1.3018 | down | Serhl2         | NM_0011305<br>79 |
| A_44_P1060<br>345 | 0.0078 | 1.2420 | up   | Cpox           | NM_0010370<br>95 |
| A_44_P4535<br>67  | 0.0104 | 1.5049 | up   |                | BC091295         |
| A_44_P7448<br>84  | 0.0355 | 1.1665 | up   |                |                  |
| A_44_P7675<br>48  | 0.0267 | 1.2054 | down |                | DV726492         |
| A_44_P5465<br>74  | 0.0261 | 1.2945 | down | Ankrd32        | NM_0011064<br>00 |
| A_44_P8727<br>77  | 0.0009 | 2.0231 | up   |                | XM_0027295<br>57 |
| A_44_P5593<br>92  | 0.0119 | 1.2027 | up   | Txn1           | BF281355         |
| A_44_P8673<br>86  | 0.0352 | 1.2211 | up   |                |                  |
| A_42_P5407<br>11  | 0.0390 | 1.5526 | up   | Rasd2          | NM_133568        |
| A_44_P5216<br>99  | 0.0482 | 1.2064 | down | Mpz11          | NM_0010077<br>28 |
| A_44_P5785<br>05  | 0.0036 | 1.6228 | down |                |                  |
| A_44_P1237<br>32  | 0.0143 | 1.2995 | up   | RGD156330<br>7 | XM_0010794<br>51 |

|              |        |        |      |            |              |
|--------------|--------|--------|------|------------|--------------|
| A_44_P520273 | 0.0344 | 2.0616 | up   |            |              |
| A_44_P396327 | 0.0025 | 1.3687 | up   |            | XM_238572    |
| A_43_P11601  | 0.0239 | 1.1856 | down | Sod3       | NM_012880    |
| A_44_P262517 | 0.0243 | 1.3831 | up   | LOC689412  | NM_001109538 |
| A_44_P105608 | 0.0217 | 1.5663 | up   |            | XM_002727056 |
| A_44_P857088 | 0.0385 | 1.2129 | down |            | H32887       |
| A_44_P504019 | 0.0010 | 1.8279 | up   |            | XM_217592    |
| A_44_P139749 | 0.0454 | 1.1508 | up   | Pla2g16    | NM_017060    |
| A_44_P118140 | 0.0419 | 1.2725 | up   |            | AA944856     |
| A_44_P489076 | 0.0488 | 1.2010 | up   |            | AW915692     |
| A_43_P12167  | 0.0141 | 1.3190 | down | Gpd1       | NM_022215    |
| A_44_P414544 | 0.0442 | 2.2358 | up   | RGD1563231 | M84148       |
| A_44_P435945 | 0.0176 | 4.5986 | up   | Dppa1      | NM_001105905 |
| A_44_P827767 | 0.0278 | 1.1882 | down |            |              |
| A_44_P624482 | 0.0496 | 1.1036 | up   |            |              |
| A_44_P179814 | 0.0389 | 1.2530 | down | Gas6       | NM_057100    |
| A_44_P929396 | 0.0210 | 1.3301 | up   |            |              |
| A_44_P490265 | 0.0088 | 1.2820 | up   | RGD1564730 | XM_001067793 |
| A_44_P991864 | 0.0125 | 1.4161 | up   | Ece1       | NM_053596    |
| A_43_P12011  | 0.0128 | 1.1114 | up   | Cltc       | NM_019299    |
| A_44_P413731 | 0.0296 | 1.5474 | up   |            | AW254506     |
| A_44_P386269 | 0.0425 | 1.3970 | up   |            | AI104291     |

|                   |        |        |      |                |                  |
|-------------------|--------|--------|------|----------------|------------------|
| A_44_P1376<br>81  | 0.0149 | 1.3957 | down | Khk            | NM_031855        |
| A_44_P2692<br>80  | 0.0262 | 1.4156 | down | Pou2f3         | NM_0011057<br>45 |
| A_44_P2013<br>89  | 0.0347 | 1.1045 | up   | Psmc6          | NM_0011005<br>09 |
| A_44_P1199<br>56  | 0.0073 | 1.4187 | up   |                | BF417776         |
| A_44_P3581<br>10  | 0.0001 | 1.5871 | up   | Tsg101         | NM_181628        |
| A_44_P2226<br>73  | 0.0081 | 1.2180 | down | Tysnd1         | NM_0011089<br>32 |
| A_44_P5339<br>43  | 0.0091 | 1.1206 | down | Rtn3           | NM_080909        |
| A_44_P1565<br>21  | 0.0023 | 1.2688 | up   | Krtap1-5       | NM_0010251<br>35 |
| A_44_P2607<br>25  | 0.0371 | 1.1726 | down | RGD130659<br>5 | NM_0010256<br>26 |
| A_44_P1302<br>17  | 0.0039 | 1.6624 | up   |                | BG670404         |
| A_44_P9783<br>98  | 0.0182 | 1.2744 | down |                | EV767235         |
| A_44_P1618<br>46  | 0.0422 | 1.6914 | down | Hist3h2ba      | NM_0011111<br>27 |
| A_44_P1024<br>529 | 0.0022 | 1.2139 | up   | Sfrs2          | NM_0010097<br>20 |
| A_42_P6218<br>82  | 0.0059 | 1.1055 | up   | Copa           | NM_0011345<br>40 |
| A_44_P3139<br>04  | 0.0370 | 1.1151 | down | Dars2          | NM_0010341<br>43 |
| A_44_P1887<br>96  | 0.0007 | 1.4220 | up   |                | AI059912         |
| A_44_P4794<br>72  | 0.0408 | 1.2173 | down |                | AI407002         |
| A_42_P6070<br>26  | 0.0364 | 1.1787 | up   | Lysmd2         | NM_0011068<br>39 |
| A_44_P3555<br>82  | 0.0182 | 1.2251 | up   |                | AA923973         |
| A_43_P1204<br>8   | 0.0168 | 1.1342 | up   | Atp5h          | NM_019383        |
| A_44_P1961<br>11  | 0.0158 | 1.2868 | up   |                | AA891789         |
| A_44_P2335<br>69  | 0.0108 | 1.1709 | down | Gnb5           | NM_031770        |



|                   |        |        |      |                |                  |
|-------------------|--------|--------|------|----------------|------------------|
| A_44_P3045<br>42  | 0.0265 | 1.0973 | down |                | XM_341251        |
| A_44_P8841<br>71  | 0.0455 | 1.3659 | down |                |                  |
| A_44_P7789<br>16  | 0.0160 | 1.3764 | down |                |                  |
| A_44_P8220<br>51  | 0.0009 | 1.8660 | up   |                |                  |
| A_44_P2249<br>91  | 0.0254 | 1.4132 | up   |                | XM_226023        |
| A_44_P1495<br>99  | 0.0168 | 1.1746 | down | RGD131155<br>8 | NM_0010797<br>05 |
| A_44_P4393<br>78  | 0.0304 | 1.2071 | up   |                | AW521344         |
| A_44_P5687<br>26  | 0.0321 | 1.3312 | up   |                |                  |
| A_44_P1965<br>32  | 0.0436 | 1.3239 | up   | Mk1            | NM_134399        |
| A_44_P1541<br>31  | 0.0401 | 1.2226 | down | Man2c1         | NM_139256        |
| A_43_P1585<br>0   | 0.0241 | 1.3851 | up   | Cyp2j3         | NM_175766        |
| A_44_P2714<br>16  | 0.0376 | 1.1986 | down | Rabggtb        | NM_138708        |
| A_44_P2774<br>94  | 0.0492 | 1.5539 | up   |                | AI058788         |
| A_44_P3288<br>29  | 0.0317 | 1.2865 | down |                | XM_220639        |
| A_44_P5756<br>87  | 0.0293 | 1.1719 | up   | LOC691254      | XM_0010774<br>02 |
| A_44_P4665<br>17  | 0.0024 | 2.2566 | up   |                | XM_345405        |
| A_44_P6213<br>66  | 0.0318 | 1.2775 | up   |                |                  |
| A_44_P2852<br>47  | 0.0266 | 1.1163 | up   | Ube3c          | XM_347039        |
| A_44_P8220<br>61  | 0.0404 | 1.6500 | down |                | XM_0010672<br>41 |
| A_44_P2788<br>81  | 0.0064 | 1.2751 | up   | RGD1562558     |                  |
| A_44_P5153<br>60  | 0.0257 | 1.1512 | up   | Scamp1         | NM_0011006<br>36 |
| A_44_P1037<br>526 | 0.0423 | 1.1469 | up   | Eif3a          | NM_0010470<br>87 |

|                   |        |        |      |                |                  |
|-------------------|--------|--------|------|----------------|------------------|
| A_44_P1977<br>83  | 0.0122 | 2.0330 | up   | Selk           | BQ205389         |
| A_44_P1547<br>69  | 0.0010 | 1.6667 | down |                | XM_0010811<br>66 |
| A_44_P9978<br>15  | 0.0387 | 1.1127 | down | Cxxc1          | NM_0010796<br>98 |
| A_44_P3110<br>96  | 0.0352 | 1.3192 | down | Abcb4          | NM_012690        |
| A_42_P4704<br>17  | 0.0028 | 1.4221 | down | RGD130810<br>6 | NM_0011345<br>75 |
| A_44_P1513<br>91  | 0.0399 | 1.2964 | up   |                | AI179025         |
| A_44_P1831<br>85  | 0.0390 | 1.2308 | down | Fxr2           | NM_0011006<br>47 |
| A_44_P3750<br>29  | 0.0160 | 1.8975 | down | Dact2          | NM_0011074<br>64 |
| A_44_P5733<br>04  | 0.0021 | 1.3269 | down |                | AW916728         |
| A_42_P5026<br>21  | 0.0214 | 1.4980 | down | Avil           | NM_024401        |
| A_44_P5497<br>53  | 0.0096 | 1.3519 | down |                | AA848758         |
| A_44_P2165<br>11  | 0.0310 | 1.1943 | down |                | AW918690         |
| A_44_P7621<br>98  | 0.0457 | 1.1096 | down | Reep3          | NM_0011063<br>86 |
| A_44_P8698<br>71  | 0.0451 | 1.1789 | up   |                |                  |
| A_44_P4453<br>59  | 0.0486 | 1.2567 | down | Pex7           | NM_0010341<br>47 |
| A_43_P1380<br>8   | 0.0048 | 1.2749 | up   | Gps2           | NM_0010174<br>77 |
| A_42_P4921<br>30  | 0.0150 | 1.1369 | down |                | XM_0027245<br>87 |
| A_44_P1042<br>668 | 0.0100 | 1.2488 | up   | Hint3          | AY040767         |
| A_44_P4082<br>22  | 0.0334 | 1.2816 | down |                | CA339340         |
| A_42_P5708<br>48  | 0.0293 | 1.4106 | down | Pcsk1          | NM_017091        |
| A_44_P2125<br>52  | 0.0388 | 1.4108 | up   | Tob1           | NM_133317        |
| A_44_P2646<br>59  | 0.0319 | 1.2236 | down | Dpysl3         | NM_012934        |

|                  |        |        |      |         |                  |
|------------------|--------|--------|------|---------|------------------|
| A_44_P3153<br>32 | 0.0349 | 1.5440 | up   |         | AA875068         |
| A_44_P3271<br>27 | 0.0073 | 1.4406 | up   |         | AA955905         |
| A_42_P6699<br>07 | 0.0413 | 1.2212 | down | Slc16a7 | NM_017302        |
| A_44_P7689<br>45 | 0.0299 | 1.1865 | down | Dtnbp1  | NM_0010376<br>64 |
| A_44_P2514<br>76 | 0.0161 | 1.5138 | up   |         | AI407309         |
| A_43_P1718<br>6  | 0.0205 | 1.3485 | down | Gatsl3  | NM_0010251<br>28 |
| A_44_P3110<br>28 | 0.0444 | 1.2296 | up   |         | BQ194449         |
| A_44_P8856<br>44 | 0.0461 | 1.4406 | down |         |                  |
| A_44_P3508<br>23 | 0.0042 | 1.1278 | up   | Cherp   | NM_0011060<br>64 |
| A_44_P1065<br>81 | 0.0343 | 1.2581 | down |         | AW143880         |
| A_44_P6871<br>09 | 0.0170 | 1.4300 | down |         | CA339191         |
| A_43_P2228<br>5  | 0.0015 | 1.2116 | down | Dnajc4  | NM_0010131<br>96 |
| A_44_P4440<br>39 | 0.0214 | 1.4608 | down | Acss1   | NM_0011065<br>24 |
| A_44_P4675<br>91 | 0.0018 | 1.7048 | down | Neu2    | NM_017130        |
| A_44_P1669<br>30 | 0.0372 | 1.4689 | down | Aldh7a1 | XM_214535        |
| A_44_P8266<br>05 | 0.0113 | 1.1997 | up   |         |                  |
| A_43_P1215<br>2  | 0.0212 | 1.4746 | down | Robo1   | NM_022188        |
| A_44_P3399<br>94 | 0.0095 | 1.7785 | up   |         |                  |
| A_44_P3303<br>32 | 0.0385 | 1.2711 | up   | Prkaca  | NM_0011009<br>22 |
| A_44_P8377<br>40 | 0.0129 | 1.0878 | down | Asb6    | NM_0010119<br>63 |
| A_42_P7173<br>08 | 0.0307 | 1.2457 | up   | Thap6   | NM_0011072<br>09 |
| A_42_P6547<br>39 | 0.0149 | 1.3214 | down | Rnf6    | NM_0011071<br>18 |

|                   |        |        |      |         |                  |
|-------------------|--------|--------|------|---------|------------------|
| A_44_P2508<br>39  | 0.0018 | 1.1802 | up   |         | XM_229366        |
| A_44_P4321<br>39  | 0.0215 | 1.0990 | down | Rpl5    | NM_031099        |
| A_44_P1471<br>56  | 0.0434 | 1.4242 | down | Rbm47   | NM_0010058<br>82 |
| A_44_P1756<br>54  | 0.0466 | 1.2637 | down |         |                  |
| A_44_P4268<br>06  | 0.0118 | 1.4762 | down |         | XM_342652        |
| A_44_P9039<br>77  | 0.0460 | 1.2070 | up   |         |                  |
| A_44_P5753<br>19  | 0.0355 | 1.2161 | down |         |                  |
| A_44_P1013<br>38  | 0.0228 | 1.3779 | down |         | DV727231         |
| A_43_P1353<br>3   | 0.0319 | 1.1489 | down |         | EV771450         |
| A_44_P3955<br>10  | 0.0001 | 1.7432 | down | Ly6g6d  | NM_0010019<br>70 |
| A_44_P4174<br>70  | 0.0360 | 1.1928 | up   |         | XR_007475        |
| A_44_P1214<br>77  | 0.0044 | 1.3103 | up   | Mrpl21  | NM_0011075<br>67 |
| A_44_P5076<br>50  | 0.0480 | 1.1616 | up   |         | AA848508         |
| A_44_P3656<br>53  | 0.0376 | 1.3674 | down | Idh2    | NM_0010141<br>61 |
| A_42_P5983<br>04  | 0.0478 | 1.6296 | up   | Klrb1a  | NM_0010109<br>64 |
| A_44_P9914<br>59  | 0.0020 | 1.5886 | up   | Nsmce2  | NM_0010248<br>76 |
| A_44_P1289<br>74  | 0.0499 | 1.1913 | down |         | BQ203441         |
| A_44_P7922<br>81  | 0.0050 | 1.9266 | up   | Cys1    | NM_0011095<br>97 |
| A_44_P1042<br>504 | 0.0020 | 1.2643 | up   | Rg9mtd2 | NM_0010442<br>32 |
| A_44_P3203<br>76  | 0.0241 | 1.1996 | up   |         | BM388420         |
| A_44_P8526<br>23  | 0.0082 | 1.3224 | up   |         |                  |
| A_44_P4290<br>06  | 0.0368 | 1.2102 | down | Lass1   | NM_0010442<br>30 |

|              |        |        |      |            |              |
|--------------|--------|--------|------|------------|--------------|
| A_43_P21209  | 0.0309 | 1.0641 | down | Ccdc130    | NM_001037644 |
| A_44_P541317 | 0.0035 | 1.1037 | down | Hs2st1     | NM_001100518 |
| A_43_P19155  | 0.0101 | 1.2670 | down | Inadl      | XM_233212    |
| A_44_P445854 | 0.0209 | 1.4373 | down | RGD1564722 | XM_343160    |
| A_44_P928761 | 0.0079 | 1.7987 | up   |            |              |
| A_43_P10591  | 0.0125 | 1.1104 | up   | Tcea1      | NM_001025735 |
| A_44_P292487 | 0.0299 | 1.1427 | up   | Scpep1     | NM_133383    |
| A_44_P416960 | 0.0248 | 1.7807 | down | Vil1       | NM_001108224 |
| A_44_P399580 | 0.0241 | 1.2460 | up   |            | AI556271     |
| A_44_P760225 | 0.0002 | 1.8014 | up   |            |              |
| A_44_P402220 | 0.0013 | 1.2293 | up   |            | AI104907     |
| A_44_P281595 | 0.0278 | 1.1751 | down | Nmnat1     | NM_001037556 |
| A_42_P827480 | 0.0027 | 1.2914 | up   | Aplp1      | NM_001100802 |
| A_44_P359957 | 0.0420 | 1.2956 | up   |            | AA819141     |
| A_43_P11098  | 0.0262 | 1.2165 | up   | Cdc42bpb   | NM_053620    |
| A_44_P918225 | 0.0030 | 1.7836 | up   |            |              |
| A_44_P788644 | 0.0137 | 1.1802 | down |            | AI030814     |
| A_43_P20363  | 0.0098 | 1.2079 | down | Sf4        | NM_001011920 |
| A_44_P101223 | 0.0347 | 1.1945 | down |            | CB546475     |
| A_44_P825558 | 0.0131 | 1.1568 | down | Ranbp10    | NM_001135875 |
| A_42_P830641 | 0.0238 | 1.1146 | down | Znf746     | NM_001100852 |
| A_44_P450967 | 0.0238 | 1.2270 | up   |            | CX570609     |

|                   |        |        |      |                |                  |
|-------------------|--------|--------|------|----------------|------------------|
| A_44_P1035<br>353 | 0.0017 | 1.5576 | up   |                |                  |
| A_44_P2907<br>06  | 0.0310 | 1.3383 | down |                | XM_226680        |
| A_44_P4769<br>36  | 0.0078 | 1.2186 | down |                | X62295           |
| A_44_P1581<br>69  | 0.0153 | 1.4647 | up   |                | BI295013         |
| A_44_P2025<br>73  | 0.0118 | 1.2789 | up   |                | AA848427         |
| A_44_P1023<br>611 | 0.0326 | 1.2481 | down | Ino80b         | NM_0010482<br>33 |
| A_43_P1599<br>8   | 0.0257 | 1.5323 | up   | Ntn3           | NM_053732        |
| A_44_P4148<br>38  | 0.0012 | 2.0452 | up   | RGD156184<br>1 | XM_0010552<br>35 |
| A_44_P2234<br>35  | 0.0488 | 1.3817 | down |                | DV718896         |
| A_44_P5558<br>08  | 0.0481 | 1.1056 | up   |                | BC085360         |
| A_44_P1052<br>324 | 0.0346 | 1.5027 | up   | Lamp3          | NM_0010120<br>15 |
| A_44_P3844<br>62  | 0.0171 | 1.1307 | up   | RGD156571<br>3 | XM_0010567<br>85 |
| A_44_P1848<br>96  | 0.0399 | 1.2242 | down | LOC683722      | NM_0011010<br>08 |
| A_44_P1038<br>54  | 0.0206 | 1.2181 | up   |                | AW918531         |
| A_44_P6385<br>54  | 0.0256 | 1.1183 | up   |                |                  |
| A_44_P1948<br>21  | 0.0054 | 1.5204 | up   | Topbp1         | XM_236578        |
| A_44_P3029<br>96  | 0.0077 | 1.2317 | down |                | XM_342171        |
| A_44_P7456<br>33  | 0.0144 | 1.4497 | down |                |                  |
| A_44_P1898<br>37  | 0.0126 | 1.3728 | down | Carkd          | NM_0011084<br>02 |
| A_44_P1070<br>826 | 0.0480 | 1.2377 | down | Gng10          | NM_053660        |
| A_44_P7083<br>81  | 0.0318 | 1.9540 | up   |                | CB315312         |
| A_44_P3449<br>37  | 0.0227 | 1.3178 | up   |                | XM_346150        |

|                   |        |        |      |               |                  |
|-------------------|--------|--------|------|---------------|------------------|
| A_42_P4578<br>95  | 0.0041 | 1.1716 | down | Supv311       | NM_0010124<br>62 |
| A_44_P1004<br>781 | 0.0477 | 1.4901 | down |               | XM_0010562<br>27 |
| A_44_P5161<br>44  | 0.0224 | 1.1737 | down | Mpdu1         | NM_0011070<br>11 |
| A_44_P2993<br>19  | 0.0089 | 2.1814 | up   | Olr1174       | NM_0010010<br>16 |
| A_43_P1668<br>5   | 0.0416 | 1.3414 | down | Abca3         | XM_220219        |
| A_44_P2679<br>68  | 0.0384 | 1.2007 | up   |               | AA945325         |
| A_44_P4174<br>29  | 0.0221 | 1.1664 | down | Coq6          | NM_0010119<br>83 |
| A_44_P2835<br>61  | 0.0212 | 1.1938 | down | Mgst1         | NM_134349        |
| A_44_P1020<br>105 | 0.0358 | 1.1224 | down | Aff4          | NM_0011070<br>01 |
| A_44_P3127<br>55  | 0.0060 | 1.2460 | down |               | BM388648         |
| A_44_P3448<br>58  | 0.0045 | 1.7761 | down | Pi16          | NM_0011704<br>81 |
| A_42_P7781<br>15  | 0.0090 | 1.3626 | down | Phlda2        | NM_0011704<br>80 |
| A_44_P2486<br>86  | 0.0362 | 1.3223 | down |               | XM_237468        |
| A_44_P4316<br>85  | 0.0398 | 1.8817 | down | MGC11619<br>7 | NM_0010257<br>55 |
| A_44_P9771<br>08  | 0.0085 | 1.2125 | down |               | BF554755         |
| A_44_P2504<br>46  | 0.0408 | 1.3007 | down | Znf580        | XM_218196        |
| A_44_P4407<br>09  | 0.0425 | 1.2047 | up   |               | XM_222799        |
| A_44_P6027<br>24  | 0.0140 | 1.1847 | up   |               | BF522056         |
| A_43_P2163<br>9   | 0.0369 | 1.1520 | down | Plekhg3       | XM_234320        |
| A_44_P1019<br>096 | 0.0373 | 1.1333 | up   | Tmem87b       | XM_342515        |
| A_44_P3512<br>09  | 0.0205 | 1.3931 | up   | Phlda1        | NM_017180        |
| A_44_P2881<br>56  | 0.0033 | 1.3723 | down | Cbr1          | NM_019170        |

|                   |        |        |      |                |                  |
|-------------------|--------|--------|------|----------------|------------------|
| A_44_P4313<br>58  | 0.0143 | 1.7692 | up   |                |                  |
| A_44_P3839<br>28  | 0.0136 | 1.2018 | down | Hacl1          | NM_053493        |
| A_44_P2693<br>16  | 0.0026 | 1.4914 | down | Rxrg           | NM_031765        |
| A_43_P2206<br>8   | 0.0033 | 1.5257 | down |                | XM_221392        |
| A_44_P3341<br>95  | 0.0320 | 1.3084 | down | Qars           | NM_0010076<br>24 |
| A_44_P5065<br>14  | 0.0432 | 1.5395 | down |                | BC079387         |
| A_44_P3823<br>49  | 0.0074 | 1.4201 | up   |                | XM_228774        |
| A_43_P2331<br>0   | 0.0272 | 1.3844 | down | Pitpnm2        | NM_0011071<br>39 |
| A_44_P9291<br>19  | 0.0026 | 1.4433 | up   |                |                  |
| A_44_P4244<br>40  | 0.0011 | 1.2857 | up   | LOC291480      | XM_225800        |
| A_44_P2814<br>57  | 0.0291 | 1.1510 | up   | RGD156272<br>5 | XM_575923        |
| A_44_P2727<br>73  | 0.0245 | 2.4261 | up   |                | AA956465         |
| A_44_P1020<br>640 | 0.0322 | 1.2871 | up   | Dus2l          | NM_0011061<br>81 |
| A_43_P1184<br>0   | 0.0478 | 1.9647 | up   | Xdh            | NM_017154        |
| A_44_P6389<br>01  | 0.0157 | 2.0147 | down |                |                  |
| A_44_P2898<br>28  | 0.0369 | 1.3134 | up   |                | AW915926         |
| A_44_P2391<br>71  | 0.0053 | 1.1997 | up   | Rpl35a         | NM_021264        |
| A_43_P1154<br>3   | 0.0294 | 1.5523 | up   | Klrd1          | NM_012745        |
| A_42_P6865<br>67  | 0.0086 | 1.1344 | up   |                |                  |
| A_43_P2322<br>5   | 0.0280 | 1.4424 | down | Scarf2         | NM_0011058<br>64 |
| A_42_P7044<br>29  | 0.0132 | 1.8368 | down | Fgf13          | NM_053428        |
| A_42_P5440<br>41  | 0.0397 | 1.2087 | down |                | AW914911         |



|                   |        |        |      |          |                  |
|-------------------|--------|--------|------|----------|------------------|
| A_43_P1805<br>1   | 0.0381 | 1.3010 | down |          | EV775563         |
| A_44_P5600<br>38  | 0.0037 | 1.2744 | up   |          |                  |
| A_44_P1014<br>379 | 0.0265 | 1.1066 | down | Cdv3     | NM_0010140<br>97 |
| A_43_P1146<br>0   | 0.0069 | 1.4714 | down | Cela1    | NM_012552        |
| A_44_P7155<br>24  | 0.0314 | 1.4841 | up   |          | AY724520         |
| A_44_P5110<br>79  | 0.0430 | 1.3128 | up   | Snrnp48  | NM_0011061<br>07 |
| A_44_P9745<br>53  | 0.0024 | 1.6375 | up   |          |                  |
| A_44_P9755<br>54  | 0.0249 | 1.1520 | down |          |                  |
| A_44_P3819<br>17  | 0.0110 | 1.9173 | down | Sphk1    | NM_133386        |
| A_44_P5880<br>37  | 0.0259 | 1.1419 | down |          | BG666601         |
| A_44_P2961<br>80  | 0.0223 | 1.4847 | down | Arg2     | NM_019168        |
| A_44_P1524<br>34  | 0.0055 | 1.6753 | up   |          |                  |
| A_43_P1683<br>1   | 0.0305 | 1.1039 | up   |          | XM_232055        |
| A_43_P1143<br>5   | 0.0149 | 1.6110 | down | Apoc3    | NM_012501        |
| A_44_P6967<br>74  | 0.0004 | 2.2756 | up   | Ptpn12   | NM_057115        |
| A_44_P1026<br>431 | 0.0226 | 1.1804 | up   | Xrn2     | NM_0011085<br>96 |
| A_44_P3520<br>55  | 0.0139 | 1.5167 | down |          | XM_234919        |
| A_42_P4627<br>11  | 0.0423 | 1.1583 | down | Use1     | NM_0011691<br>00 |
| A_44_P4801<br>83  | 0.0424 | 1.8307 | up   |          | L07406           |
| A_44_P3619<br>31  | 0.0072 | 1.2000 | up   |          | CA506982         |
| A_44_P1028<br>22  | 0.0378 | 1.3382 | up   | Marveld1 | NM_0011075<br>90 |
| A_44_P8990<br>21  | 0.0245 | 1.3553 | down |          |                  |

|                   |        |        |      |                |                  |
|-------------------|--------|--------|------|----------------|------------------|
| A_44_P4477<br>01  | 0.0467 | 1.2569 | up   |                |                  |
| A_44_P1298<br>40  | 0.0086 | 1.6910 | down |                | AW525988         |
| A_44_P7022<br>58  | 0.0030 | 1.3631 | up   | Eea1           | NM_0011080<br>86 |
| A_44_P2595<br>21  | 0.0230 | 1.3146 | up   |                | AA874885         |
| A_44_P7284<br>52  | 0.0028 | 1.9879 | up   |                | AY539877         |
| A_44_P2114<br>40  | 0.0335 | 1.2144 | down | Araf           | NM_022532        |
| A_44_P1285<br>23  | 0.0334 | 1.1735 | up   | RGD156580<br>6 | XM_0010768<br>46 |
| A_44_P4389<br>47  | 0.0431 | 1.1639 | up   |                | AW535184         |
| A_44_P8215<br>99  | 0.0320 | 1.3340 | up   | LOC679116      |                  |
| A_42_P7626<br>18  | 0.0287 | 1.1971 | down | Ccs            | NM_053425        |
| A_44_P3044<br>69  | 0.0060 | 1.3676 | down | Fv1            | NM_0010140<br>18 |
| A_44_P1125<br>31  | 0.0061 | 1.5433 | up   |                |                  |
| A_44_P9958<br>74  | 0.0372 | 1.1226 | down |                | XM_0027257<br>89 |
| A_44_P8828<br>56  | 0.0237 | 1.2944 | up   |                |                  |
| A_44_P5054<br>72  | 0.0125 | 1.4341 | up   |                | DV719576         |
| A_44_P1281<br>95  | 0.0066 | 1.8901 | down | Ppp1r1b        | NM_138521        |
| A_44_P1040<br>889 | 0.0402 | 1.2654 | up   | Cpsf6          | NM_0011067<br>85 |
| A_44_P1027<br>758 | 0.0008 | 1.4591 | up   |                | AW915041         |
| A_44_P9286<br>69  | 0.0401 | 1.2058 | up   |                | XM_0010558<br>64 |
| A_42_P7632<br>24  | 0.0456 | 1.2108 | down | Scgb1c1        | NM_0011075<br>61 |
| A_44_P5462<br>79  | 0.0305 | 1.2059 | down | Galm           | NM_0010077<br>04 |
| A_44_P8540<br>11  | 0.0214 | 1.3850 | down | Ppfia4         | NM_080409        |

|                   |        |        |      |                |                  |
|-------------------|--------|--------|------|----------------|------------------|
| A_44_P7733<br>50  | 0.0367 | 1.1870 | down |                | CO386862         |
| A_43_P1327<br>3   | 0.0466 | 1.3055 | down | Col5a1         | NM_134452        |
| A_43_P1684<br>7   | 0.0041 | 2.0023 | down | Spsb1          | NM_0011079<br>94 |
| A_44_P1986<br>69  | 0.0076 | 1.2330 | down | LOC500684      | NM_0010479<br>59 |
| A_42_P5438<br>77  | 0.0360 | 1.1040 | down | Tlcd1          | NM_0010138<br>58 |
| A_43_P1760<br>8   | 0.0028 | 1.3010 | up   | Smek2          | NM_0011083<br>67 |
| A_44_P7289<br>32  | 0.0344 | 1.1214 | up   |                |                  |
| A_44_P1014<br>700 | 0.0366 | 1.3743 | down | Cog2           | NM_0011104<br>94 |
| A_42_P6007<br>96  | 0.0346 | 1.2158 | down | Ccdc53         | NM_0011067<br>76 |
| A_44_P2321<br>13  | 0.0139 | 1.4889 | up   |                |                  |
| A_44_P4775<br>40  | 0.0459 | 1.4830 | up   |                | AI007905         |
| A_44_P4642<br>21  | 0.0019 | 1.9327 | up   | RGD156637<br>3 | XM_0010804<br>46 |
| A_43_P2313<br>5   | 0.0443 | 1.6003 | up   | Jph1           | NM_0011066<br>30 |
| A_42_P7079<br>70  | 0.0124 | 1.0884 | down | Mgat1          | NM_030861        |
| A_44_P1534<br>03  | 0.0347 | 1.2816 | up   |                | AI575277         |
| A_44_P5223<br>03  | 0.0115 | 1.1318 | down | Il11ra1        | NM_139116        |
| A_44_P3128<br>31  | 0.0005 | 1.9082 | up   |                | AI227667         |
| A_44_P3237<br>00  | 0.0152 | 1.8735 | down | Tll1           | NM_0011060<br>81 |
| A_44_P9301<br>92  | 0.0215 | 1.9975 | down |                |                  |
| A_44_P2988<br>46  | 0.0304 | 1.2667 | up   |                | CR466561         |
| A_44_P3428<br>21  | 0.0146 | 1.7335 | down | Cd300lf        | NM_0010251<br>11 |
| A_44_P1025<br>750 | 0.0019 | 1.6106 | up   | Rchy1          | NM_0010076<br>18 |

|                   |        |        |      |                |                  |
|-------------------|--------|--------|------|----------------|------------------|
| A_44_P1597<br>76  | 0.0181 | 1.3238 | up   |                | AI044664         |
| A_44_P8742<br>58  | 0.0234 | 1.1994 | down |                | CR466498         |
| A_44_P5751<br>32  | 0.0380 | 1.4765 | up   |                |                  |
| A_44_P4086<br>79  | 0.0299 | 1.1450 | down | Ssx2ip         | NM_175597        |
| A_44_P2675<br>29  | 0.0099 | 1.1682 | up   | Terf1          | NM_0010124<br>64 |
| A_44_P3427<br>56  | 0.0028 | 1.5994 | up   |                |                  |
| A_44_P8546<br>89  | 0.0382 | 1.2702 | up   | Ldlrap1        | NM_0011092<br>71 |
| A_43_P1651<br>5   | 0.0476 | 2.1068 | down |                | XM_215130        |
| A_44_P5171<br>80  | 0.0098 | 1.1029 | down |                | BC158826         |
| A_44_P8342<br>69  | 0.0367 | 1.6945 | up   |                | XR_085594        |
| A_44_P1849<br>09  | 0.0362 | 1.3345 | up   |                |                  |
| A_44_P9789<br>73  | 0.0164 | 1.6202 | up   |                |                  |
| A_44_P3561<br>61  | 0.0301 | 1.4036 | down | Ppy            | NM_012626        |
| A_44_P4747<br>55  | 0.0217 | 1.0802 | down | Ctsa           | NM_0010119<br>59 |
| A_43_P2146<br>4   | 0.0118 | 1.2382 | down | Atg4c          | NM_0011079<br>48 |
| A_44_P2769<br>90  | 0.0095 | 1.2946 | down | Eepd1          | NM_0010140<br>88 |
| A_44_P6948<br>72  | 0.0416 | 1.1655 | up   | Fubp1          | NM_0010376<br>53 |
| A_44_P4599<br>04  | 0.0493 | 1.3070 | down |                | BQ779840         |
| A_44_P6803<br>69  | 0.0174 | 1.3200 | up   |                | BF545930         |
| A_44_P2996<br>99  | 0.0494 | 1.2405 | down | Tmem135        | NM_0010138<br>96 |
| A_44_P1046<br>205 | 0.0012 | 1.7366 | up   |                | NM_0011066<br>63 |
| A_44_P4552<br>06  | 0.0246 | 1.4219 | up   | RGD156111<br>8 | XM_220759        |

|                   |        |        |      |           |                  |
|-------------------|--------|--------|------|-----------|------------------|
| A_43_P1294<br>0   | 0.0143 | 1.2443 | up   | Bak1      | NM_053812        |
| A_44_P5600<br>36  | 0.0013 | 1.5204 | up   |           |                  |
| A_44_P3679<br>52  | 0.0448 | 1.2644 | down |           | XM_223390        |
| A_44_P3082<br>82  | 0.0344 | 1.1868 | up   |           | AA817787         |
| A_44_P4548<br>82  | 0.0372 | 1.5079 | up   |           |                  |
| A_44_P1008<br>329 | 0.0031 | 1.1396 | up   | Fgfr1op2  | NM_201421        |
| A_44_P2342<br>57  | 0.0010 | 1.5703 | up   | LOC291686 | XM_0027253<br>24 |
| A_44_P1019<br>245 | 0.0077 | 1.2177 | up   | Zmat3     | NM_022548        |
| A_44_P2680<br>18  | 0.0386 | 1.2678 | up   |           | BF543500         |
| A_44_P4428<br>13  | 0.0208 | 1.7693 | down | Cxadr     | NM_053570        |
| A_44_P2748<br>15  | 0.0303 | 1.1361 | down | Wsb1      | NM_0010256<br>64 |
| A_44_P1028<br>45  | 0.0476 | 1.1490 | up   | Ube2v1    | NM_0011103<br>45 |
| A_44_P4998<br>51  | 0.0495 | 1.2487 | down | Safb      | NM_022394        |
| A_44_P2817<br>88  | 0.0216 | 1.4845 | up   |           | BQ196033         |
| A_44_P7759<br>10  | 0.0319 | 1.4180 | down | Dppa3     | NM_0010478<br>64 |
| A_44_P1356<br>41  | 0.0226 | 1.4244 | down | Rapsn     | NM_0011085<br>84 |
| A_44_P4658<br>95  | 0.0484 | 1.1776 | down | Atp6v1f   | NM_053884        |
| A_44_P5552<br>61  | 0.0281 | 1.3534 | down | Aldh6a1   | NM_031057        |
| A_44_P1120<br>43  | 0.0214 | 1.1274 | down | Iscu      | NM_0011059<br>36 |
| A_44_P7907<br>67  | 0.0173 | 1.2077 | up   |           |                  |
| A_44_P2818<br>33  | 0.0441 | 1.2654 | up   |           | AA924101         |
| A_43_P2345<br>9   | 0.0218 | 1.4846 | up   |           | XM_235679        |

|                  |        |        |      |                |                  |
|------------------|--------|--------|------|----------------|------------------|
| A_44_P5052<br>68 | 0.0047 | 1.4675 | up   |                | AI044343         |
| A_44_P4293<br>54 | 0.0023 | 1.7984 | up   |                |                  |
| A_44_P3188<br>83 | 0.0345 | 1.1732 | up   | RGD156064<br>8 | XM_344518        |
| A_43_P2112<br>2  | 0.0018 | 1.2860 | down | Syt12          | NM_0011084<br>92 |
| A_44_P2607<br>40 | 0.0167 | 1.3410 | down | Cbr3           | NM_0011071<br>10 |
| A_44_P9153<br>44 | 0.0163 | 2.6233 | down | Emx2           | NM_0011091<br>69 |
| A_43_P1837<br>4  | 0.0257 | 1.3071 | down | Plek2          | NM_0011141<br>80 |
| A_44_P8560<br>07 | 0.0153 | 1.1734 | up   | Iqgap1         | NM_0011084<br>89 |
| A_44_P2166<br>12 | 0.0172 | 1.5485 | up   |                | AW915235         |
| A_44_P2424<br>99 | 0.0466 | 1.3943 | up   |                | BE118080         |
| A_44_P2499<br>90 | 0.0236 | 1.3693 | down | Mal2           | NM_198786        |
| A_42_P6485<br>97 | 0.0299 | 1.1291 | down | Kat5           | NM_0010058<br>72 |
| A_44_P4411<br>95 | 0.0463 | 1.4127 | down | Acad11         | NM_0011081<br>81 |
| A_44_P1734<br>78 | 0.0022 | 1.3818 | up   |                | XM_343002        |
| A_44_P2530<br>87 | 0.0081 | 1.2172 | down | Sh3glb2        | NM_0010096<br>92 |
| A_44_P3432<br>67 | 0.0374 | 1.2814 | up   |                | XM_0027250<br>29 |
| A_44_P2350<br>28 | 0.0477 | 1.4445 | down |                | AI101484         |
| A_44_P2260<br>29 | 0.0194 | 1.1515 | up   | Rbmxrt1        | NM_0011074<br>20 |
| A_44_P3203<br>56 | 0.0199 | 1.1599 | down |                | AW921307         |
| A_44_P3873<br>08 | 0.0458 | 1.1978 | down | Adamtsl4       | NM_0010340<br>12 |
| A_44_P5065<br>68 | 0.0011 | 1.5507 | up   |                | XM_234253        |
| A_44_P2228<br>55 | 0.0057 | 1.4120 | up   |                |                  |

|                  |        |        |      |                |                  |
|------------------|--------|--------|------|----------------|------------------|
| A_44_P4160<br>87 | 0.0086 | 1.1201 | down |                | AY053517         |
| A_44_P9701<br>10 | 0.0196 | 1.3643 | up   |                | AW253396         |
| A_44_P4641<br>19 | 0.0038 | 1.6261 | up   |                |                  |
| A_44_P8860<br>03 | 0.0335 | 1.2668 | down |                |                  |
| A_44_P4564<br>79 | 0.0028 | 1.6707 | down | Col23a1        | NM_181636        |
| A_44_P1378<br>02 | 0.0104 | 1.0942 | down | Smpd1          | NM_0010069<br>97 |
| A_44_P9964<br>23 | 0.0373 | 1.1056 | up   | Zufsp          | NM_0010083<br>08 |
| A_44_P4872<br>69 | 0.0196 | 4.3012 | up   |                | BC092584         |
| A_42_P4985<br>06 | 0.0236 | 1.3449 | up   |                | BE103448         |
| A_44_P8456<br>25 | 0.0255 | 1.5294 | up   |                |                  |
| A_44_P6843<br>40 | 0.0390 | 1.3853 | down |                | AA875314         |
| A_44_P2853<br>28 | 0.0116 | 1.2211 | up   |                | AI177160         |
| A_44_P8253<br>11 | 0.0205 | 1.3365 | up   |                |                  |
| A_43_P2213<br>6  | 0.0262 | 1.1614 | down | RGD130680<br>9 | NM_0010442<br>52 |
| A_44_P7432<br>48 | 0.0076 | 1.5122 | up   |                | AI599340         |
| A_44_P3327<br>02 | 0.0474 | 1.3379 | up   | Inhbb          | NM_080771        |
| A_44_P8063<br>69 | 0.0104 | 1.5077 | up   |                |                  |
| A_44_P7759<br>82 | 0.0411 | 1.1489 | down | Armc9          | NM_0011096<br>63 |
| A_44_P2358<br>15 | 0.0250 | 1.2031 | up   | Clns1a         | NM_031719        |
| A_44_P4636<br>91 | 0.0146 | 1.6218 | up   | Gpr3           | NM_153727        |
| A_44_P2101<br>78 | 0.0161 | 1.2161 | up   | Carhsp1        | NM_152790        |
| A_44_P3746<br>18 | 0.0482 | 1.2394 | down | Cdkn1c         | NM_182735        |

|                  |        |        |      |                |                  |
|------------------|--------|--------|------|----------------|------------------|
| A_44_P2346<br>55 | 0.0016 | 1.5512 | up   |                | AA957960         |
| A_43_P1073<br>5  | 0.0496 | 1.2306 | down | Fbxo21         | NM_0011083<br>38 |
| A_44_P5789<br>99 | 0.0049 | 1.7997 | up   |                |                  |
| A_44_P2061<br>15 | 0.0056 | 1.7985 | up   | RGD155996<br>3 | XM_0010619<br>07 |
| A_44_P2379<br>38 | 0.0160 | 1.2229 | up   | Vps36          | NM_0011060<br>92 |
| A_44_P1474<br>70 | 0.0076 | 1.2075 | down |                |                  |
| A_42_P6732<br>12 | 0.0310 | 1.1249 | down | Cad            | NM_0011057<br>10 |
| A_44_P2377<br>39 | 0.0334 | 1.5042 | down | Lsr            | NM_032616        |
| A_44_P4611<br>87 | 0.0403 | 1.3008 | down | St3gal4        | NM_203337        |
| A_44_P2990<br>86 | 0.0468 | 1.2406 | up   |                | AI112947         |
| A_42_P6644<br>59 | 0.0181 | 1.2486 | up   |                | BQ202863         |
| A_44_P2881<br>53 | 0.0434 | 1.1891 | down | Cbr1           | NM_019170        |
| A_44_P2156<br>98 | 0.0360 | 1.1113 | up   |                |                  |
| A_44_P1383<br>75 | 0.0045 | 1.4552 | up   |                | AA858930         |
| A_44_P7003<br>90 | 0.0360 | 1.1870 | down |                |                  |
| A_44_P2926<br>34 | 0.0157 | 1.2691 | down | Fth1           | NM_012848        |
| A_44_P5557<br>03 | 0.0443 | 1.2371 | down |                | XM_347122        |
| A_44_P8683<br>35 | 0.0126 | 1.3104 | up   |                |                  |
| A_44_P4355<br>96 | 0.0259 | 1.5000 | up   | Zfp36          | NM_133290        |
| A_44_P5579<br>79 | 0.0176 | 1.5329 | down | Ubap1          | NM_0010121<br>90 |
| A_44_P3753<br>80 | 0.0480 | 1.1597 | down |                | XM_0010541<br>56 |
| A_43_P1905<br>9  | 0.0177 | 1.2364 | up   | Noc31          | NM_0011085<br>23 |



|                   |        |        |      |           |                  |
|-------------------|--------|--------|------|-----------|------------------|
| A_44_P1204<br>25  | 0.0385 | 1.7919 | up   |           | AI230862         |
| A_43_P1734<br>4   | 0.0421 | 1.2223 | down |           | XM_232252        |
| A_44_P2534<br>79  | 0.0480 | 1.3981 | down | Tmem98    | NM_0010076<br>72 |
| A_44_P1681<br>84  | 0.0307 | 1.3038 | up   | Rasl2-9   | NM_0011666<br>75 |
| A_42_P4593<br>49  | 0.0404 | 1.2674 | down | Sgk493    | NM_0011080<br>07 |
| A_43_P1224<br>3   | 0.0249 | 1.1504 | down | Prdx3     | NM_022540        |
| A_44_P4440<br>10  | 0.0159 | 1.2439 | down |           | BQ779937         |
| A_44_P8073<br>94  | 0.0297 | 1.1240 | up   |           |                  |
| A_44_P6962<br>27  | 0.0048 | 1.5942 | up   |           | AA997189         |
| A_43_P2097<br>0   | 0.0107 | 1.2562 | down |           | BC088292         |
| A_44_P8508<br>02  | 0.0409 | 3.6058 | down |           | AA945994         |
| A_44_P5394<br>44  | 0.0417 | 1.2673 | down |           | AA997385         |
| A_44_P1164<br>49  | 0.0140 | 1.1980 | up   | Rala      | NM_031093        |
| A_44_P7928<br>45  | 0.0393 | 1.4361 | up   |           |                  |
| A_44_P2345<br>00  | 0.0086 | 1.3883 | up   |           | XR_006077        |
| A_44_P5155<br>93  | 0.0038 | 1.6468 | up   |           | XM_344148        |
| A_44_P5909<br>06  | 0.0192 | 1.7634 | up   | Klri2     | NM_0010126<br>48 |
| A_44_P4809<br>54  | 0.0245 | 1.3042 | down | Abhd15    | NM_0011070<br>25 |
| A_44_P3265<br>23  | 0.0228 | 1.3721 | down | Smpd4     | NM_0011678<br>06 |
| A_44_P1036<br>339 | 0.0180 | 1.2026 | up   | LOC689842 | XR_006738        |
| A_44_P1461<br>23  | 0.0380 | 1.1134 | down |           | AA892855         |
| A_44_P5072<br>74  | 0.0224 | 1.1416 | up   | Dars      | BC072534         |

|                   |        |        |      |                |                  |
|-------------------|--------|--------|------|----------------|------------------|
| A_44_P4589<br>87  | 0.0004 | 1.7045 | up   |                | AY325145         |
| A_44_P5134<br>28  | 0.0415 | 1.2089 | down | Polr3c         | NM_0010120<br>81 |
| A_44_P1610<br>52  | 0.0227 | 1.4845 | down | RGD156237<br>3 | NM_0010400<br>19 |
| A_44_P5719<br>78  | 0.0069 | 1.6317 | up   |                | BE110761         |
| A_44_P3638<br>24  | 0.0339 | 1.2320 | down | Brd1           | NM_0011081<br>03 |
| A_44_P1048<br>967 | 0.0178 | 1.1655 | up   |                | AI112633         |
| A_44_P6026<br>63  | 0.0149 | 1.4671 | up   |                | BP478914         |
| A_44_P1056<br>80  | 0.0006 | 1.2190 | down | Znf496         | XM_220512        |
| A_44_P1005<br>65  | 0.0328 | 1.1467 | up   |                |                  |
| A_44_P4804<br>55  | 0.0139 | 1.3036 | down | Efs            | NM_0011060<br>33 |
| A_44_P1830<br>07  | 0.0012 | 1.5339 | up   |                |                  |
| A_44_P7601<br>24  | 0.0067 | 1.6157 | up   |                |                  |
| A_44_P5428<br>66  | 0.0275 | 1.3145 | up   |                | BQ198871         |
| A_44_P3542<br>29  | 0.0145 | 1.3903 | up   |                | XM_228535        |
| A_44_P3047<br>59  | 0.0037 | 2.0221 | up   |                |                  |
| A_44_P1014<br>955 | 0.0132 | 1.2478 | up   | Psph           | NM_0010096<br>79 |
| A_44_P4779<br>03  | 0.0075 | 1.2089 | down | Apbb3          | NM_053957        |
| A_42_P7085<br>69  | 0.0339 | 1.1271 | up   | Ube3a          | XM_341867        |
| A_44_P8143<br>86  | 0.0158 | 1.5290 | up   |                |                  |
| A_44_P1033<br>595 | 0.0236 | 1.3600 | down | Atl3           | NM_0010442<br>41 |
| A_44_P5144<br>58  | 0.0105 | 1.3990 | up   |                | AI178246         |
| A_44_P1465<br>52  | 0.0249 | 1.2302 | up   |                | AA964921         |

|                   |        |        |      |                |                  |
|-------------------|--------|--------|------|----------------|------------------|
| A_44_P3399<br>36  | 0.0356 | 1.2949 | down | Xpr1           | NM_0011059<br>92 |
| A_44_P1071<br>84  | 0.0228 | 1.1976 | down | Rbbp9          | NM_019219        |
| A_42_P6228<br>78  | 0.0217 | 1.1670 | down | Entpd4         | NM_0011083<br>84 |
| A_44_P3299<br>74  | 0.0361 | 1.1308 | up   |                | BF282674         |
| A_44_P3648<br>59  | 0.0131 | 1.7026 | down | Lypd2          | CB547501         |
| A_44_P5231<br>12  | 0.0359 | 1.1257 | down | RGD130614<br>8 | XM_232937        |
| A_44_P5399<br>17  | 0.0197 | 1.2892 | up   |                | AA925597         |
| A_44_P2197<br>80  | 0.0242 | 1.2270 | up   | Surf2          | NM_0010338<br>66 |
| A_42_P6680<br>42  | 0.0244 | 1.1145 | down | Zwint          | NM_147138        |
| A_44_P1595<br>86  | 0.0444 | 1.2977 | up   |                | BF565379         |
| A_44_P1159<br>05  | 0.0058 | 1.3643 | up   |                | DV719302         |
| A_44_P4225<br>38  | 0.0092 | 1.4622 | up   |                | AI574779         |
| A_42_P4937<br>85  | 0.0003 | 1.1829 | up   | Cdk2ap1        | NM_0011137<br>51 |
| A_44_P8976<br>20  | 0.0262 | 1.1983 | up   |                | BQ781487         |
| A_42_P7551<br>33  | 0.0162 | 1.3080 | down |                | XM_0010788<br>82 |
| A_44_P3601<br>26  | 0.0050 | 1.9086 | up   |                | BE096754         |
| A_44_P3609<br>46  | 0.0383 | 1.1022 | up   |                |                  |
| A_44_P5928<br>30  | 0.0067 | 1.4161 | up   |                |                  |
| A_44_P1054<br>967 | 0.0109 | 1.1462 | up   | Sirt7          | NM_0011070<br>73 |
| A_43_P1738<br>7   | 0.0059 | 1.2842 | down |                | BC158841         |
| A_44_P5081<br>62  | 0.0226 | 1.1714 | down | Adamts5        | NM_198761        |
| A_44_P1062<br>48  | 0.0093 | 1.2892 | up   |                | M95791           |

|                   |        |        |      |           |                  |
|-------------------|--------|--------|------|-----------|------------------|
| A_44_P2156<br>89  | 0.0109 | 2.2797 | down | LOC686934 | XM_343744        |
| A_43_P1498<br>5   | 0.0314 | 1.0551 | up   | Rpl19     | NM_031103        |
| A_44_P3287<br>58  | 0.0011 | 1.5959 | down | Acpl2     | NM_0010077<br>10 |
| A_44_P4512<br>25  | 0.0099 | 1.4645 | up   |           | BE115943         |
| A_44_P4341<br>09  | 0.0091 | 1.5941 | up   | Hes7      | NM_0011057<br>92 |
| A_43_P2311<br>6   | 0.0378 | 1.2535 | down | Pdss2     | NM_0010142<br>49 |
| A_44_P5755<br>59  | 0.0032 | 1.9658 | up   |           |                  |
| A_44_P7149<br>86  | 0.0472 | 1.2735 | down |           | CK478004         |
| A_44_P7757<br>47  | 0.0186 | 1.2430 | up   |           | XM_0010588<br>85 |
| A_44_P1035<br>872 | 0.0150 | 1.2310 | up   | Mtrf11    | NM_0010257<br>23 |
| A_43_P1659<br>1   | 0.0263 | 1.3443 | down | Oxct1     | NM_0011275<br>80 |
| A_44_P1577<br>21  | 0.0269 | 1.5813 | up   |           | Y00054           |
| A_44_P4144<br>69  | 0.0129 | 1.4050 | up   | Hadha     | NM_130826        |
| A_44_P6066<br>97  | 0.0371 | 1.1199 | up   | Coro1c    | NM_0011093<br>27 |
| A_43_P2011<br>8   | 0.0376 | 1.2390 | down | Suclg2    | NM_0011007<br>50 |
| A_44_P2602<br>85  | 0.0029 | 1.2976 | up   |           | XM_344449        |
| A_43_P1122<br>1   | 0.0307 | 1.0982 | down | Afg3l2    | NM_0011348<br>64 |
| A_44_P4875<br>32  | 0.0064 | 1.4399 | down | Tmem56    | NM_0011358<br>79 |
| A_43_P1566<br>5   | 0.0208 | 1.2452 | down | Bckdha    | NM_012782        |
| A_44_P9963<br>92  | 0.0396 | 1.1788 | up   | Trdmt1    | NM_0010316<br>43 |
| A_43_P1978<br>5   | 0.0487 | 1.1928 | down |           | CV080010         |
| A_44_P4290<br>92  | 0.0470 | 1.2101 | down | Sap130    | XM_226078        |

|                  |        |        |      |           |                  |
|------------------|--------|--------|------|-----------|------------------|
| A_44_P1758<br>37 | 0.0301 | 1.2377 | down |           | XM_229646        |
| A_44_P6893<br>95 | 0.0495 | 2.0240 | down | Cox8b     | AI103885         |
| A_44_P4820<br>88 | 0.0301 | 1.3417 | up   |           | AI599589         |
| A_44_P5620<br>01 | 0.0340 | 1.8360 | up   |           | XM_0027254<br>84 |
| A_44_P2518<br>97 | 0.0200 | 1.1898 | up   |           | AI010087         |
| A_44_P4010<br>83 | 0.0322 | 1.3282 | down | Abhd14b   | NM_0010076<br>64 |
| A_44_P7375<br>31 | 0.0112 | 1.5625 | up   |           |                  |
| A_44_P4850<br>98 | 0.0463 | 1.1807 | down |           | XM_342013        |
| A_44_P8886<br>44 | 0.0259 | 1.5939 | up   |           |                  |
| A_44_P5906<br>71 | 0.0143 | 1.4045 | up   |           |                  |
| A_44_P1495<br>63 | 0.0193 | 1.5802 | down | Znf646    | XM_219364        |
| A_44_P2110<br>28 | 0.0007 | 1.9733 | up   |           |                  |
| A_44_P6668<br>72 | 0.0347 | 1.2684 | down |           | AI044127         |
| A_44_P3239<br>51 | 0.0470 | 1.6469 | down |           | XM_346161        |
| A_44_P3475<br>67 | 0.0101 | 1.5196 | up   |           | AA819537         |
| A_44_P3424<br>16 | 0.0003 | 1.6206 | up   |           | XM_344565        |
| A_44_P1194<br>53 | 0.0436 | 1.1641 | down | LOC683719 | XM_0010671<br>87 |
| A_44_P4459<br>53 | 0.0489 | 1.6026 | up   | Fbl11     | NM_0011088<br>24 |
| A_44_P5417<br>30 | 0.0395 | 1.3571 | up   |           | BG371738         |
| A_44_P6231<br>49 | 0.0005 | 1.3450 | up   |           |                  |
| A_44_P3952<br>49 | 0.0409 | 1.3150 | down |           | AI236635         |
| A_44_P9289<br>69 | 0.0411 | 1.3207 | up   |           |                  |

|                   |        |        |      |          |                  |
|-------------------|--------|--------|------|----------|------------------|
| A_44_P4513<br>92  | 0.0406 | 1.1757 | up   | Fbxo33   | NM_0011080<br>23 |
| A_43_P1413<br>1   | 0.0244 | 1.3434 | up   | Rgs2     | AF279918         |
| A_44_P1004<br>840 | 0.0397 | 1.2755 | up   | Tnfsf9   | NM_181384        |
| A_44_P8101<br>90  | 0.0334 | 1.2299 | up   |          | XM_0010765<br>94 |
| A_44_P3084<br>79  | 0.0127 | 1.5125 | up   |          | AA997228         |
| A_44_P8526<br>03  | 0.0062 | 1.5226 | up   |          |                  |
| A_44_P3997<br>95  | 0.0171 | 1.4253 | up   |          | BF281201         |
| A_44_P1386<br>89  | 0.0015 | 1.6962 | up   |          | AA957167         |
| A_42_P7704<br>58  | 0.0006 | 1.1307 | down | Exoc2    | NM_134414        |
| A_43_P2255<br>6   | 0.0384 | 1.5270 | down | Cidea    | NM_0011704<br>67 |
| A_42_P4785<br>00  | 0.0115 | 1.1874 | down | Slc22a17 | NM_177421        |
| A_44_P4575<br>58  | 0.0091 | 2.0012 | down |          | AI144777         |
| A_43_P2132<br>9   | 0.0231 | 1.3137 | down | Fam117b  | NM_0011087<br>97 |
| A_44_P7447<br>65  | 0.0018 | 1.4098 | up   |          |                  |
| A_44_P3913<br>82  | 0.0233 | 1.5849 | up   |          |                  |
| A_44_P7930<br>08  | 0.0279 | 1.6453 | up   |          |                  |
| A_44_P3742<br>12  | 0.0029 | 1.2397 | up   |          | BF285164         |
| A_44_P5265<br>76  | 0.0390 | 1.4372 | up   |          | BF283652         |
| A_44_P8539<br>91  | 0.0049 | 1.5474 | up   |          |                  |
| A_44_P3495<br>53  | 0.0205 | 1.2208 | down | Col6a1   | XM_215375        |
| A_44_P1020<br>780 | 0.0199 | 1.2785 | down | Tmc4     | NM_0010341<br>04 |
| A_44_P2179<br>67  | 0.0113 | 1.5832 | up   |          |                  |

|                   |        |        |      |           |                  |
|-------------------|--------|--------|------|-----------|------------------|
| A_44_P4874<br>92  | 0.0084 | 1.2291 | down |           | XM_344494        |
| A_44_P3001<br>83  | 0.0206 | 1.2337 | down | Slc48a1   | NM_0011274<br>56 |
| A_44_P1767<br>98  | 0.0450 | 1.2656 | up   |           | AA892313         |
| A_44_P3671<br>43  | 0.0205 | 1.2048 | up   |           | AA818023         |
| A_44_P9189<br>39  | 0.0003 | 2.2062 | up   |           |                  |
| A_44_P1073<br>30  | 0.0428 | 1.2723 | down | LOC246295 | NM_145082        |
| A_43_P1796<br>4   | 0.0330 | 1.2155 | up   | Arcn1     | NM_0010076<br>62 |
| A_44_P4575<br>78  | 0.0211 | 1.3513 | up   |           | AA858732         |
| A_43_P1826<br>8   | 0.0260 | 1.1850 | down |           | CF110390         |
| A_44_P8984<br>12  | 0.0037 | 1.9414 | up   |           |                  |
| A_44_P1038<br>773 | 0.0384 | 1.3914 | up   | Gpx7      | NM_0011066<br>73 |
| A_44_P2708<br>12  | 0.0031 | 1.3803 | up   | Tmem189   | NM_0011137<br>52 |
| A_44_P3788<br>74  | 0.0318 | 1.4659 | up   |           | BQ205721         |
| A_44_P2081<br>57  | 0.0246 | 1.2729 | down | Dnajc5    | NM_024161        |
| A_44_P5587<br>84  | 0.0279 | 1.2465 | up   |           | AW918767         |
| A_42_P6716<br>01  | 0.0220 | 1.1239 | up   | Pigl      | D88364           |
| A_44_P2358<br>48  | 0.0171 | 1.3461 | up   |           | AI179535         |
| A_44_P2192<br>50  | 0.0312 | 1.2234 | up   |           | AI411280         |
| A_44_P1013<br>405 | 0.0222 | 1.2127 | down | Acy3      | NM_0010096<br>03 |
| A_44_P9749<br>94  | 0.0083 | 1.5358 | up   |           |                  |
| A_44_P5386<br>02  | 0.0231 | 1.0940 | up   | Copb2     | NM_021765        |
| A_44_P3891<br>56  | 0.0015 | 2.2068 | down | Ankrd56   | XM_0010706<br>24 |

|                   |        |        |      |                |                  |
|-------------------|--------|--------|------|----------------|------------------|
| A_44_P1058<br>31  | 0.0125 | 1.4664 | up   | Clic4          | NM_031818        |
| A_44_P7475<br>45  | 0.0150 | 1.2531 | down | Xpr1           | BC161992         |
| A_44_P8649<br>23  | 0.0222 | 1.3857 | down |                | AW916836         |
| A_44_P3414<br>56  | 0.0022 | 1.4935 | up   | Peli1          | NM_0011005<br>65 |
| A_44_P1003<br>372 | 0.0454 | 1.1527 | down | Smpdl3a        | NM_0010055<br>39 |
| A_44_P1079<br>96  | 0.0169 | 1.6495 | up   | LOC367050      | XM_0027270<br>20 |
| A_44_P9510<br>89  | 0.0443 | 1.2848 | up   |                |                  |
| A_44_P3446<br>64  | 0.0429 | 1.5021 | down | RGD130992<br>2 | NM_0011704<br>72 |
| A_44_P4141<br>12  | 0.0387 | 1.2774 | up   |                | AA900619         |
| A_44_P8358<br>67  | 0.0410 | 1.1919 | down |                | AW142828         |
| A_44_P3917<br>06  | 0.0408 | 1.1968 | down | Abcb8          | NM_0010077<br>96 |
| A_44_P4157<br>76  | 0.0282 | 1.5807 | up   |                | AA819759         |
| A_44_P2297<br>69  | 0.0282 | 1.1246 | down | Rps2           | NM_031838        |
| A_44_P1052<br>868 | 0.0330 | 1.2989 | up   | Syne1          | AF452647         |
| A_44_P3587<br>12  | 0.0078 | 1.4206 | up   |                |                  |
| A_44_P1007<br>449 | 0.0058 | 1.4711 | down | RGD131015<br>9 | NM_0011345<br>37 |
| A_44_P5066<br>73  | 0.0041 | 1.6714 | up   |                | XM_220196        |
| A_43_P1544<br>4   | 0.0064 | 1.3304 | down | Smo            | NM_012807        |
| A_44_P9953<br>73  | 0.0090 | 1.1302 | up   | LOC682888      | BP485722         |
| A_44_P1077<br>73  | 0.0224 | 1.2860 | up   | RGD156081<br>5 | XM_0010648<br>17 |
| A_44_P3447<br>77  | 0.0032 | 1.3668 | up   |                | XM_230014        |
| A_44_P8541<br>81  | 0.0059 | 1.4279 | up   |                |                  |



|               |        |        |      |            |              |
|---------------|--------|--------|------|------------|--------------|
| A_42_P814081  | 0.0318 | 1.2036 | up   |            | EV768991     |
| A_44_P426788  | 0.0105 | 1.3529 | down | Pmepa1     | NM_001107807 |
| A_44_P468902  | 0.0311 | 1.6499 | down |            | XM_226288    |
| A_44_P385014  | 0.0003 | 2.7930 | up   | Atad2      | NM_001134879 |
| A_44_P464656  | 0.0119 | 1.3006 | up   |            | BF282271     |
| A_44_P243153  | 0.0473 | 1.1389 | down | Ncoa6      | AF176351     |
| A_44_P120669  | 0.0176 | 1.1411 | up   |            | AI511097     |
| A_44_P197786  | 0.0389 | 1.3644 | up   |            | AA944397     |
| A_44_P530424  | 0.0462 | 1.2170 | down | N-pac      | BC085931     |
| A_44_P914096  | 0.0012 | 1.7171 | up   | RGD1560017 | XM_342480    |
| A_44_P556531  | 0.0026 | 1.4779 | down | Emilin1    | NM_001106710 |
| A_44_P562860  | 0.0406 | 1.3523 | down |            |              |
| A_44_P929051  | 0.0062 | 1.8113 | up   |            |              |
| A_44_P868863  | 0.0275 | 1.2106 | down |            |              |
| A_44_P354844  | 0.0158 | 1.1165 | down | Thap11     | NM_001107422 |
| A_44_P880152  | 0.0019 | 1.9929 | up   | Nfyb       | NM_031553    |
| A_44_P307952  | 0.0341 | 1.3807 | down |            | AI104089     |
| A_44_P1008094 | 0.0234 | 1.2425 | up   | Exosc7     | NM_001100725 |
| A_44_P683994  | 0.0045 | 1.2194 | up   |            |              |
| A_43_P16784   | 0.0052 | 1.1627 | down | Med25      | NM_001170426 |
| A_43_P10230   | 0.0275 | 1.3073 | down |            | XM_217630    |
| A_43_P17175   | 0.0486 | 1.2850 | down | Serpina1a  | NM_001031642 |

|                   |        |        |      |                |                  |
|-------------------|--------|--------|------|----------------|------------------|
| A_44_P1057<br>707 | 0.0290 | 1.1241 | up   | Pno1           | NM_199083        |
| A_44_P1470<br>55  | 0.0260 | 1.7313 | down | Gjb1           | NM_017251        |
| A_44_P4605<br>96  | 0.0404 | 1.2164 | up   |                | AI230748         |
| A_44_P8558<br>08  | 0.0112 | 1.4368 | up   |                |                  |
| A_44_P7605<br>99  | 0.0116 | 1.2560 | down | Tc2n           | NM_0010251<br>52 |
| A_42_P4954<br>28  | 0.0279 | 1.1888 | up   | Mlec           | NM_0010139<br>83 |
| A_44_P1015<br>839 | 0.0323 | 1.4643 | down | RGD156344<br>0 | NM_0011009<br>65 |
| A_44_P3978<br>75  | 0.0298 | 1.3168 | up   | Khsrp          | NM_133602        |
| A_44_P8803<br>38  | 0.0429 | 1.3173 | up   |                | BE111926         |
| A_44_P4279<br>96  | 0.0322 | 1.2579 | up   |                | AI408945         |
| A_44_P3601<br>95  | 0.0261 | 1.2329 | up   |                | AA901338         |
| A_44_P1050<br>728 | 0.0029 | 1.0963 | up   |                | AY724482         |
| A_44_P1020<br>219 | 0.0005 | 1.4736 | down | Rundc1         | XM_0010814<br>65 |
| A_44_P5387<br>89  | 0.0102 | 1.9328 | up   |                | XM_222813        |
| A_44_P2293<br>76  | 0.0052 | 1.2175 | up   | Sdad1          | NM_0010069<br>58 |
| A_44_P1071<br>497 | 0.0238 | 1.2335 | up   |                | AI232289         |
| A_43_P1954<br>6   | 0.0455 | 1.2016 | up   | Zc3h13         | NM_0011704<br>71 |
| A_44_P4505<br>00  | 0.0008 | 1.5736 | up   | LOC301231      |                  |
| A_44_P5579<br>34  | 0.0078 | 1.4835 | down | Thnsl2         | NM_0010096<br>58 |
| A_44_P1426<br>52  | 0.0433 | 1.1497 | down | Pcgf1          | NM_0010070<br>00 |
| A_44_P5205<br>35  | 0.0258 | 1.1926 | down | Pkp4           | NM_0011064<br>82 |
| A_44_P5688<br>05  | 0.0106 | 1.3845 | up   |                | CO556520         |

|                   |        |        |      |                |                  |
|-------------------|--------|--------|------|----------------|------------------|
| A_44_P1003<br>212 | 0.0345 | 1.1447 | down | Igf2r          | NM_012756        |
| A_44_P1401<br>64  | 0.0001 | 1.5425 | up   |                | XM_219771        |
| A_43_P2041<br>2   | 0.0451 | 1.2989 | down | Arsg           | NM_0010478<br>77 |
| A_44_P3169<br>59  | 0.0254 | 1.4123 | up   |                | AI112954         |
| A_42_P6641<br>21  | 0.0273 | 1.5749 | up   | Adora2a        | NM_053294        |
| A_44_P3745<br>86  | 0.0051 | 1.2222 | down | Cyb5a          | NM_022245        |
| A_44_P2575<br>28  | 0.0478 | 1.1825 | up   | LOC287010      | AF053093         |
| A_42_P5470<br>27  | 0.0341 | 1.1211 | down | Fuca2          | NM_0010042<br>18 |
| A_42_P4811<br>76  | 0.0086 | 1.1909 | down | Scamp4         | NM_031725        |
| A_44_P1987<br>46  | 0.0369 | 1.5310 | down | P2rx3          | NM_031075        |
| A_44_P2965<br>61  | 0.0289 | 1.2537 | up   |                | BG668164         |
| A_44_P1007<br>689 | 0.0007 | 1.9072 | up   | RGD156395<br>2 | NM_0011345<br>88 |
| A_44_P2447<br>04  | 0.0053 | 1.6317 | up   |                | AW920988         |
| A_44_P3876<br>80  | 0.0201 | 1.1475 | up   |                | BC098052         |
| A_44_P5437<br>33  | 0.0040 | 2.0544 | up   |                |                  |
| A_44_P2194<br>14  | 0.0093 | 1.5642 | up   |                | BI297513         |
| A_42_P8013<br>79  | 0.0433 | 1.1128 | down | Fgfr11         | NM_199114        |
| A_44_P2006<br>47  | 0.0479 | 1.3686 | up   | Hmgb2          | NM_017187        |
| A_44_P1239<br>54  | 0.0136 | 1.3839 | down |                | XM_226181        |
| A_44_P9996<br>30  | 0.0178 | 1.1109 | up   | Cdc16          | NM_0010247<br>44 |
| A_42_P6982<br>40  | 0.0405 | 1.1960 | down | Ptgr1          | NM_138863        |
| A_44_P9652<br>29  | 0.0397 | 1.2498 | down |                |                  |

|                   |        |        |      |          |                  |
|-------------------|--------|--------|------|----------|------------------|
| A_44_P1458<br>91  | 0.0067 | 1.7113 | up   | Armex1   | NM_0010243<br>67 |
| A_44_P1035<br>720 | 0.0121 | 1.3151 | up   | Kin      | NM_0011095<br>29 |
| A_44_P3235<br>91  | 0.0201 | 1.1489 | down | Ctr9     | NM_0011006<br>61 |
| A_44_P3282<br>83  | 0.0116 | 1.3813 | down | Mtmr15   | XM_219706        |
| A_44_P2536<br>74  | 0.0169 | 1.2499 | down |          | CB585046         |
| A_43_P1011<br>8   | 0.0302 | 1.2096 | down |          | FM074451         |
| A_42_P6182<br>74  | 0.0053 | 1.2431 | up   | Tm9sf1   | NM_0010121<br>55 |
| A_44_P1910<br>21  | 0.0426 | 1.4939 | down | Phyh     | NM_053674        |
| A_44_P1037<br>817 | 0.0190 | 1.1969 | up   | Lman2    | NM_0011150<br>24 |
| A_44_P8770<br>59  | 0.0249 | 1.2918 | down | Ttpal    | NM_0011065<br>37 |
| A_44_P2316<br>57  | 0.0084 | 1.1309 | down |          | XM_0027255<br>19 |
| A_44_P5571<br>99  | 0.0210 | 1.3041 | down | Mlycd    | NM_053477        |
| A_44_P4338<br>65  | 0.0237 | 1.1853 | down | Xpc      | NM_0011078<br>74 |
| A_44_P5106<br>75  | 0.0252 | 1.8219 | up   | Il12rb1  | NM_0011706<br>04 |
| A_44_P6802<br>63  | 0.0254 | 1.2545 | down |          | AW916515         |
| A_44_P4897<br>82  | 0.0008 | 1.3392 | up   |          | XM_212905        |
| A_44_P9599<br>60  | 0.0277 | 1.1786 | up   | Cdc42se2 | NM_0011260<br>89 |
| A_44_P4548<br>61  | 0.0093 | 2.1147 | up   |          |                  |
| A_44_P3045<br>21  | 0.0262 | 1.2361 | down | Pacrgl   | XM_341225        |
| A_43_P1276<br>1   | 0.0290 | 1.1936 | up   | Atp2b1   | NM_053311        |
| A_44_P9201<br>20  | 0.0285 | 1.2766 | down | Sorbs1   | XM_0010665<br>36 |
| A_44_P2125<br>51  | 0.0317 | 1.5635 | up   | Ccl4     | NM_053858        |

|                   |        |        |      |         |                  |
|-------------------|--------|--------|------|---------|------------------|
| A_43_P1381<br>2   | 0.0436 | 1.1422 | down | Snx18   | NM_0011076<br>52 |
| A_42_P6242<br>51  | 0.0393 | 1.3099 | up   | Edc4    | NM_0010330<br>68 |
| A_44_P8559<br>45  | 0.0380 | 1.2112 | up   |         |                  |
| A_44_P4386<br>13  | 0.0144 | 1.4067 | down | Aifm2   | NM_0011394<br>83 |
| A_44_P5061<br>86  | 0.0176 | 1.4553 | up   | N4bp2   | XM_223405        |
| A_44_P9271<br>61  | 0.0397 | 1.2822 | up   |         | AA946081         |
| A_44_P3141<br>22  | 0.0433 | 1.8132 | up   |         | XM_212821        |
| A_44_P1038<br>397 | 0.0176 | 1.2362 | up   |         | DV727624         |
| A_44_P1362<br>32  | 0.0411 | 1.5881 | up   |         | BC110055         |
| A_44_P2126<br>76  | 0.0376 | 1.5980 | down | Crat    | NM_0010040<br>85 |
| A_43_P1955<br>4   | 0.0016 | 1.5431 | down | Unk     | NM_0011083<br>06 |
| A_44_P2755<br>91  | 0.0011 | 1.2223 | up   |         | AW433647         |
| A_43_P1988<br>9   | 0.0427 | 1.2966 | down | Angptl6 | NM_0011067<br>02 |
| A_44_P1053<br>383 | 0.0011 | 1.2457 | up   | Rab7a   | NM_023950        |
| A_43_P1122<br>6   | 0.0303 | 1.2236 | up   | Map4k4  | NM_0011069<br>04 |
| A_44_P6788<br>14  | 0.0185 | 1.2977 | up   |         | AW142445         |
| A_44_P7203<br>54  | 0.0364 | 1.7686 | down |         | AI010615         |
| A_44_P1031<br>483 | 0.0350 | 1.1769 | up   |         | XM_0010773<br>82 |
| A_44_P2638<br>50  | 0.0428 | 1.3441 | up   |         | AI176621         |
| A_44_P1050<br>595 | 0.0120 | 1.3642 | down | Cela1   | V01234           |
| A_44_P5503<br>78  | 0.0307 | 1.3087 | down | Ppp4c   | NM_134359        |
| A_42_P4603<br>40  | 0.0383 | 1.1875 | down | Mal2    | NM_198786        |

|                  |        |        |      |          |                  |
|------------------|--------|--------|------|----------|------------------|
| A_42_P4733<br>89 | 0.0496 | 1.1368 | down | Bmyc     | NM_0010131<br>63 |
| A_44_P1440<br>01 | 0.0230 | 1.1607 | down | Pam      | NM_013000        |
| A_44_P3879<br>50 | 0.0059 | 1.4531 | up   |          | AA858950         |
| A_44_P4833<br>34 | 0.0021 | 1.0893 | down | Lrrc47   | NM_0011356<br>66 |
| A_43_P1140<br>5  | 0.0141 | 1.3588 | down |          | XR_085908        |
| A_44_P6091<br>10 | 0.0059 | 1.5605 | up   |          |                  |
| A_44_P2578<br>98 | 0.0386 | 1.4309 | up   | Rreb1    | NM_0011073<br>48 |
| A_44_P8391<br>76 | 0.0087 | 1.4629 | up   | Usp25    | NM_0011071<br>14 |
| A_43_P1769<br>9  | 0.0108 | 1.2577 | down | Fbx15    | NM_0011072<br>22 |
| A_44_P5576<br>34 | 0.0408 | 1.2069 | down | Znf710   | NM_0011345<br>63 |
| A_44_P3671<br>94 | 0.0318 | 1.1452 | up   |          | AI111877         |
| A_44_P5623<br>50 | 0.0476 | 1.5407 | up   |          |                  |
| A_44_P2036<br>40 | 0.0472 | 1.4631 | down | Klhl25   | NM_0010390<br>06 |
| A_44_P1952<br>67 | 0.0447 | 1.3790 | up   |          | BF391710         |
| A_44_P4690<br>69 | 0.0378 | 1.3225 | down | Mapk8ip3 | NM_0011006<br>73 |
| A_44_P3823<br>72 | 0.0432 | 1.2410 | up   |          |                  |
| A_44_P4104<br>55 | 0.0484 | 1.2414 | up   | Wdr48    | NM_0011358<br>95 |
| A_44_P6851<br>39 | 0.0403 | 1.2872 | down |          | XM_0010793<br>86 |
| A_42_P8372<br>14 | 0.0158 | 1.1894 | up   | Mgmt     | NM_012861        |
| A_43_P1999<br>9  | 0.0125 | 6.9728 | up   | Fcrls    | NM_0011077<br>02 |
| A_44_P4366<br>28 | 0.0009 | 1.3719 | up   |          | AI176323         |
| A_44_P6410<br>58 | 0.0263 | 1.3283 | up   | Rbpj     | NM_0011066<br>31 |

|                   |        |        |      |           |                  |
|-------------------|--------|--------|------|-----------|------------------|
| A_44_P5368<br>32  | 0.0304 | 1.2707 | up   | Dennd2a   | XM_231654        |
| A_44_P2626<br>25  | 0.0238 | 1.3731 | up   |           | XM_344424        |
| A_42_P6981<br>88  | 0.0072 | 1.2555 | down |           | U68726           |
| A_44_P3359<br>74  | 0.0426 | 2.0995 | down | Aldh1a7   | NM_017272        |
| A_44_P4526<br>00  | 0.0195 | 1.6037 | down | LOC691083 | NM_0011448<br>62 |
| A_44_P3326<br>74  | 0.0172 | 1.6608 | down | Myh13     | AF075250         |
| A_44_P2198<br>54  | 0.0260 | 1.2812 | up   | Ncoa3     | AF322224         |
| A_43_P2221<br>0   | 0.0341 | 1.2117 | down | Znf644    | NM_0011394<br>84 |
| A_44_P1467<br>03  | 0.0035 | 1.2510 | down | Pccb      | NM_017030        |
| A_44_P2400<br>88  | 0.0374 | 1.2786 | up   |           | AI175366         |
| A_44_P4432<br>28  | 0.0007 | 1.2384 | down | Fech      | NM_0011084<br>34 |
| A_44_P3100<br>48  | 0.0089 | 1.2055 | up   | LOC682097 | BC088309         |
| A_44_P2841<br>69  | 0.0117 | 1.7366 | up   |           |                  |
| A_44_P8217<br>88  | 0.0463 | 1.9061 | up   |           |                  |
| A_44_P2129<br>85  | 0.0003 | 1.3133 | down |           | EV770136         |
| A_44_P1037<br>796 | 0.0092 | 1.0934 | down | Arfgap1   | BC070895         |
| A_44_P5073<br>82  | 0.0442 | 1.1295 | up   |           | BI294894         |
| A_44_P5608<br>41  | 0.0381 | 1.2378 | up   |           |                  |
| A_44_P4131<br>64  | 0.0019 | 1.3728 | up   |           | CB548260         |
| A_44_P5271<br>85  | 0.0392 | 1.2333 | down | Gtf3c1    | NM_133541        |
| A_42_P5210<br>06  | 0.0226 | 1.1902 | down |           | AF329824         |
| A_43_P1580<br>3   | 0.0291 | 1.4492 | up   |           | Z27105           |

|              |        |        |      |           |              |
|--------------|--------|--------|------|-----------|--------------|
| A_43_P12519  | 0.0416 | 1.2060 | up   | S100a10   | NM_031114    |
| A_44_P425355 | 0.0268 | 1.3886 | up   |           | AA850598     |
| A_44_P704181 | 0.0171 | 1.5282 | up   | Pigg      | XM_223731    |
| A_44_P365663 | 0.0004 | 1.6440 | down |           |              |
| A_44_P267106 | 0.0347 | 1.0521 | up   | LOC499782 | NM_001109198 |
| A_44_P910739 | 0.0288 | 1.1610 | up   |           | DY472814     |
| A_44_P323955 | 0.0162 | 1.3962 | up   |           |              |
| A_44_P508264 | 0.0131 | 1.2162 | up   | Cdkn1b    | NM_031762    |
| A_44_P731013 | 0.0310 | 1.1169 | down |           |              |
| A_44_P669345 | 0.0447 | 1.3073 | down | Hdac8     | NM_001126373 |
| A_44_P548299 | 0.0281 | 1.3395 | down | Thumpd1   | NM_001009688 |
| A_44_P148708 | 0.0486 | 1.1017 | up   |           | XM_001058768 |
| A_44_P374247 | 0.0150 | 1.7293 | down |           | BF395647     |
| A_43_P17238  | 0.0214 | 1.2668 | down | Rnd2      | NM_001010953 |
| A_44_P147106 | 0.0023 | 1.2670 | up   |           | XM_218374    |
| A_42_P499767 | 0.0039 | 2.0343 | down | Padi2     | NM_017226    |
| A_44_P194803 | 0.0241 | 1.2532 | down | Baalc     | NM_144762    |
| A_43_P19496  | 0.0094 | 1.4568 | down | Tmem151a  | XM_219694    |
| A_44_P379903 | 0.0016 | 1.4712 | up   |           | XM_224509    |
| A_44_P336520 | 0.0300 | 1.2162 | down |           | AI235811     |
| A_44_P249092 | 0.0215 | 1.1965 | down | Ggex      | NM_031756    |
| A_44_P821839 | 0.0033 | 1.1112 | up   |           |              |



|               |        |        |      |           |              |
|---------------|--------|--------|------|-----------|--------------|
| A_44_P132184  | 0.0249 | 1.0756 | down |           | BF290460     |
| A_44_P492914  | 0.0237 | 1.1830 | down |           | BF550034     |
| A_43_P22590   | 0.0314 | 1.3579 | down |           | XM_215841    |
| A_44_P194637  | 0.0297 | 1.4824 | down |           | CB703999     |
| A_44_P890506  | 0.0040 | 1.4902 | up   |           |              |
| A_44_P760452  | 0.0450 | 1.4018 | down | Ccdc126   | NM_001109232 |
| A_44_P872615  | 0.0105 | 1.8975 | up   |           |              |
| A_44_P246947  | 0.0424 | 1.4085 | down | Slc25a4   | NM_053515    |
| A_44_P1033684 | 0.0075 | 1.5576 | up   | Prpf4b    | NM_001011923 |
| A_44_P113132  | 0.0198 | 1.1617 | up   |           | AA899907     |
| A_44_P365462  | 0.0265 | 1.2021 | down | Cacna1d   | NM_017298    |
| A_43_P15117   | 0.0286 | 1.3832 | up   |           | BF556558     |
| A_44_P547185  | 0.0246 | 2.0330 | down | Igfbp2    | NM_013122    |
| A_42_P456939  | 0.0321 | 1.1942 | up   | Slc35b4   | NM_001106590 |
| A_43_P17005   | 0.0277 | 1.3125 | down | Hsd12     | NM_001025697 |
| A_44_P189893  | 0.0061 | 1.6999 | down | LOC679262 | XR_007339    |
| A_44_P166046  | 0.0449 | 1.3864 | down | Dak       | NM_001039031 |
| A_44_P330847  | 0.0255 | 1.8756 | down |           | XM_001062130 |
| A_44_P140532  | 0.0243 | 1.4004 | up   |           |              |
| A_44_P476107  | 0.0426 | 1.2770 | down |           | XM_217278    |
| A_44_P294103  | 0.0088 | 1.5306 | up   |           | BI296804     |
| A_44_P153617  | 0.0305 | 1.2340 | up   |           | BI295291     |

|              |        |        |      |           |              |
|--------------|--------|--------|------|-----------|--------------|
| A_44_P602689 | 0.0018 | 1.2233 | down |           | AW917134     |
| A_43_P16992  | 0.0268 | 1.2890 | down | Auh       | NM_001108407 |
| A_44_P998060 | 0.0028 | 1.7600 | up   | Mobkl3    | NM_133528    |
| A_44_P340570 | 0.0114 | 1.1941 | up   |           | AA925833     |
| A_44_P296370 | 0.0051 | 2.6562 | up   |           | CO387735     |
| A_43_P12510  | 0.0040 | 1.3673 | down | Rab3b     | NM_031091    |
| A_44_P590268 | 0.0313 | 1.2420 | down | LOC497940 | NM_001017476 |
| A_44_P590999 | 0.0147 | 1.2694 | down | Tc2n      | NM_001025152 |
| A_44_P499759 | 0.0392 | 1.3021 | down | Mto1      | NM_001106841 |
| A_44_P480208 | 0.0411 | 1.0917 | down | Rps3      | NM_001009239 |
| A_44_P375125 | 0.0348 | 1.8193 | down | Trpm5     | XM_344979    |
| A_43_P14444  | 0.0490 | 1.1620 | down |           | BC091425     |
| A_44_P164120 | 0.0160 | 1.3205 | down | Gtf3c3    | NM_001108239 |
| A_42_P633709 | 0.0239 | 1.3712 | down | Plk5      | NM_001170557 |
| A_42_P566906 | 0.0076 | 1.1781 | down | Peci      | NM_001006966 |
| A_44_P294467 | 0.0163 | 1.2644 | down | Paxip1    | NM_001107844 |
| A_44_P266119 | 0.0310 | 2.1527 | up   |           | AI176265     |
| A_44_P444674 | 0.0424 | 1.3350 | up   |           | BF395964     |
| A_44_P841775 | 0.0328 | 1.6287 | up   |           |              |
| A_44_P176169 | 0.0125 | 1.1767 | up   |           | BI292019     |
| A_42_P612220 | 0.0264 | 1.0961 | down |           | AF220455     |
| A_44_P500431 | 0.0104 | 1.1333 | down | Lman1     | NM_053886    |

|                   |        |        |      |                |                  |
|-------------------|--------|--------|------|----------------|------------------|
| A_43_P1641<br>5   | 0.0297 | 1.3085 | down | Ndufv1         | NM_0010069<br>72 |
| A_44_P1057<br>211 | 0.0147 | 1.6507 | down |                | BC162059         |
| A_43_P1694<br>2   | 0.0016 | 1.5453 | up   |                | CB546044         |
| A_44_P1009<br>656 | 0.0037 | 1.3154 | down | RGD131190<br>6 | NM_0011646<br>56 |
| A_44_P1058<br>179 | 0.0426 | 1.4823 | up   |                |                  |
| A_44_P1958<br>16  | 0.0214 | 1.2480 | up   |                | BM986566         |
| A_44_P1862<br>25  | 0.0334 | 1.2793 | up   |                | AI228076         |
| A_44_P1082<br>17  | 0.0366 | 1.2577 | down |                | XM_0010592<br>15 |
| A_44_P3890<br>34  | 0.0143 | 1.4646 | down | Trp53inp2      | AJ297794         |
| A_43_P2094<br>3   | 0.0133 | 1.3355 | down |                | CB546260         |
| A_44_P4331<br>47  | 0.0118 | 1.7872 | down | Gnat3          | NM_173139        |
| A_44_P4825<br>43  | 0.0066 | 1.4681 | up   |                | L20996           |
| A_44_P1840<br>57  | 0.0092 | 1.2330 | up   |                | BE116843         |
| A_43_P2072<br>9   | 0.0092 | 1.2426 | down | Bat2           | NM_212462        |
| A_44_P2606<br>73  | 0.0146 | 1.4245 | down | Taf8           | NM_0011081<br>97 |
| A_44_P2120<br>33  | 0.0365 | 1.1966 | up   |                | BI300426         |
| A_44_P7110<br>01  | 0.0379 | 1.2578 | down |                | AW533360         |
| A_44_P3682<br>63  | 0.0177 | 1.0743 | up   |                |                  |
| A_44_P9976<br>08  | 0.0357 | 1.0985 | down | Ndufb10        | NM_0011094<br>43 |
| A_44_P2483<br>71  | 0.0017 | 1.6337 | up   |                |                  |
| A_43_P2005<br>7   | 0.0328 | 1.1786 | up   |                | CB545427         |
| A_44_P9872<br>86  | 0.0017 | 1.7119 | up   |                | BF545850         |

|                   |        |        |      |         |                  |
|-------------------|--------|--------|------|---------|------------------|
| A_44_P2722<br>66  | 0.0021 | 1.1974 | down | Fam3a   | NM_0011093<br>24 |
| A_44_P6236<br>45  | 0.0453 | 1.3043 | down |         |                  |
| A_44_P9181<br>28  | 0.0219 | 1.4733 | down |         |                  |
| A_44_P2284<br>03  | 0.0277 | 1.7583 | down |         | AA875092         |
| A_43_P1740<br>8   | 0.0096 | 1.3289 | up   |         | CB547962         |
| A_44_P1473<br>00  | 0.0019 | 1.4324 | down | Clca5   | NM_0011074<br>50 |
| A_44_P2836<br>46  | 0.0095 | 1.7036 | down | Plekhf1 | NM_0010131<br>48 |
| A_44_P4080<br>33  | 0.0024 | 2.0867 | up   |         |                  |
| A_44_P7808<br>05  | 0.0388 | 1.1910 | down | Ino80c  | NM_0010174<br>46 |
| A_44_P1970<br>86  | 0.0058 | 1.1214 | down | Rpusd4  | NM_0010252<br>84 |
| A_44_P1032<br>752 | 0.0415 | 1.2957 | down | Tcea3   | NM_0010150<br>08 |
| A_44_P9257<br>04  | 0.0002 | 1.5898 | up   |         | AA999167         |
| A_44_P1830<br>87  | 0.0060 | 1.1889 | down | Moap1   | NM_0010131<br>01 |
| A_44_P1354<br>34  | 0.0012 | 1.3464 | up   |         | XM_222925        |
| A_44_P3082<br>88  | 0.0382 | 1.2132 | up   |         | H31600           |
| A_44_P2153<br>93  | 0.0216 | 1.6561 | down | Fam107a | NM_0010251<br>29 |
| A_44_P1013<br>713 | 0.0102 | 1.3772 | up   |         |                  |
| A_44_P1047<br>933 | 0.0127 | 2.6124 | up   |         | BF549893         |
| A_42_P5507<br>02  | 0.0284 | 1.2742 | down | Znhit2  | NM_0011075<br>74 |
| A_44_P1058<br>158 | 0.0390 | 1.1358 | down | Plbd2   | NM_139255        |
| A_44_P4077<br>88  | 0.0389 | 2.3145 | up   |         |                  |
| A_44_P9445<br>50  | 0.0381 | 1.3277 | up   |         |                  |

|                  |        |        |      |                  |                  |
|------------------|--------|--------|------|------------------|------------------|
| A_43_P1677<br>1  | 0.0123 | 1.1339 | down | LOC680692        | XM_0010568<br>96 |
| A_43_P2078<br>2  | 0.0109 | 1.1553 | up   | RGD156484<br>6   | XR_009022        |
| A_44_P1119<br>21 | 0.0392 | 1.2185 | down |                  | AF352169         |
| A_44_P4472<br>22 | 0.0289 | 1.2663 | up   | LOC500757        | XR_007455        |
| A_43_P2184<br>8  | 0.0239 | 1.2311 | down | Nfxl1            | NM_0011704<br>38 |
| A_44_P2348<br>54 | 0.0418 | 1.2680 | up   |                  | BF550234         |
| A_44_P2182<br>47 | 0.0358 | 1.1275 | down | Atpaf2           | NM_0011070<br>06 |
| A_44_P3012<br>48 | 0.0027 | 1.3306 | up   | Smek2            | NM_0011083<br>67 |
| A_44_P7138<br>02 | 0.0020 | 1.5054 | up   | LOC100360<br>380 | XR_085747        |
| A_44_P3585<br>76 | 0.0363 | 1.2694 | down |                  |                  |
| A_44_P6655<br>97 | 0.0415 | 1.3655 | down |                  | AW143403         |
| A_44_P4283<br>26 | 0.0283 | 1.5284 | down | Hmgcs2           | NM_173094        |
| A_44_P3492<br>50 | 0.0320 | 1.2125 | down | Paf1             | NM_0010248<br>98 |
| A_44_P1523<br>73 | 0.0076 | 1.6900 | up   |                  |                  |
| A_44_P4216<br>50 | 0.0357 | 1.1858 | down | Lamp1            | NM_012857        |
| A_44_P8835<br>57 | 0.0469 | 1.3062 | down | Mpv171           | NM_0010982<br>40 |
| A_44_P4730<br>74 | 0.0387 | 1.3436 | down | Slc22a5          | NM_019269        |
| A_44_P2144<br>15 | 0.0492 | 1.1391 | down | Yeats4           | NM_0011275<br>27 |
| A_44_P3280<br>16 | 0.0005 | 1.7751 | down | Rxrg             | NM_031765        |
| A_44_P1218<br>87 | 0.0421 | 1.2520 | down | Sidt2            | NM_0011081<br>42 |
| A_44_P1367<br>07 | 0.0301 | 1.1529 | down |                  | BG664788         |
| A_44_P4640<br>27 | 0.0197 | 1.2261 | down |                  | XM_226645        |

|                   |        |        |      |         |                  |
|-------------------|--------|--------|------|---------|------------------|
| A_44_P1939<br>15  | 0.0409 | 1.1101 | down | Rbm45   | NM_153306        |
| A_44_P5186<br>24  | 0.0078 | 1.5067 | up   |         | AA924018         |
| A_43_P1689<br>5   | 0.0071 | 1.1068 | down | Gcap14  | XM_224672        |
| A_44_P1471<br>42  | 0.0268 | 1.3011 | down |         | CO395473         |
| A_44_P1044<br>830 | 0.0022 | 1.4652 | up   | Lactb   | NM_0011068<br>33 |
| A_43_P1040<br>3   | 0.0068 | 1.2120 | down | Abhd12  | NM_0010243<br>14 |
| A_44_P1047<br>158 | 0.0437 | 1.1566 | up   | Tnip2   | NM_0010247<br>71 |
| A_44_P3822<br>79  | 0.0041 | 1.2060 | down | Socs6   | XM_0010635<br>12 |
| A_44_P1018<br>997 | 0.0376 | 1.1391 | up   | Tmco1   | NM_0010096<br>31 |
| A_43_P1712<br>7   | 0.0013 | 1.6207 | down |         | XM_221100        |
| A_44_P3436<br>94  | 0.0218 | 1.0737 | down | Hp1bp3  | NM_199108        |
| A_44_P7739<br>51  | 0.0198 | 1.1283 | down |         | XR_008964        |
| A_44_P3797<br>91  | 0.0146 | 1.2771 | down | Pih1d1  | NM_0010248<br>68 |
| A_44_P1854<br>11  | 0.0314 | 1.3928 | down | Trappe9 | NM_0010341<br>56 |
| A_43_P1303<br>5   | 0.0099 | 1.1319 | up   | Sfrs10  | NM_057119        |
| A_44_P9116<br>89  | 0.0029 | 1.2643 | up   |         | BM986549         |
| A_44_P8189<br>56  | 0.0387 | 1.1615 | down |         | XM_0027264<br>38 |
| A_44_P4482<br>45  | 0.0482 | 1.3002 | down | Ppp2r3a | NM_0010122<br>02 |
| A_44_P1058<br>570 | 0.0135 | 1.1289 | up   | Sigirr  | NM_0010248<br>87 |
| A_44_P4803<br>53  | 0.0015 | 1.6485 | up   |         | XM_341846        |
| A_42_P5198<br>68  | 0.0432 | 1.2121 | down | Gsr     | U73174           |
| A_43_P1032<br>6   | 0.0231 | 1.1133 | down |         | CF110545         |

|                  |        |        |      |                |                  |
|------------------|--------|--------|------|----------------|------------------|
| A_43_P2174<br>9  | 0.0469 | 1.2942 | down | Lnx2           | NM_0011083<br>29 |
| A_44_P1040<br>87 | 0.0288 | 1.3333 | down |                | BF396482         |
| A_44_P9059<br>80 | 0.0438 | 1.2437 | up   |                | AI178326         |
| A_44_P2322<br>85 | 0.0001 | 1.3774 | up   |                |                  |
| A_42_P6946<br>79 | 0.0246 | 1.6471 | up   | Hdac4          | XM_343629        |
| A_44_P5938<br>98 | 0.0371 | 1.4046 | up   |                |                  |
| A_44_P6451<br>08 | 0.0233 | 1.2658 | down |                | DY471256         |
| A_44_P8349<br>80 | 0.0039 | 1.0989 | down | Tollip         | NM_0011096<br>68 |
| A_44_P9293<br>13 | 0.0002 | 2.5716 | up   |                |                  |
| A_44_P7291<br>83 | 0.0033 | 1.3281 | up   |                |                  |
| A_42_P6185<br>38 | 0.0064 | 1.2978 | up   | Lta4h          | NM_0010300<br>31 |
| A_44_P2052<br>75 | 0.0266 | 1.4989 | up   |                | AA819474         |
| A_44_P9521<br>29 | 0.0281 | 1.1443 | down |                | CA509994         |
| A_44_P4360<br>40 | 0.0093 | 1.6531 | down | Rassf6         | NM_0010256<br>71 |
| A_44_P8025<br>11 | 0.0093 | 1.4725 | down | RGD156631<br>9 | NM_0011093<br>58 |
| A_44_P3833<br>10 | 0.0106 | 1.4851 | up   | Gata3          | NM_133293        |
| A_44_P7156<br>67 | 0.0330 | 1.3132 | down |                |                  |
| A_44_P2949<br>61 | 0.0407 | 1.2668 | down | Exoc8          | NM_139043        |
| A_44_P9000<br>01 | 0.0390 | 1.3422 | up   | Arhgef15       | NM_0011057<br>89 |
| A_44_P3493<br>36 | 0.0057 | 1.5414 | down |                | XM_223768        |
| A_44_P9316<br>25 | 0.0097 | 1.1944 | down |                | DV725773         |
| A_44_P8068<br>09 | 0.0462 | 1.2536 | down | Sh3bgr1        | NM_0011733<br>39 |

|                  |        |        |      |        |                  |
|------------------|--------|--------|------|--------|------------------|
| A_44_P1158<br>00 | 0.0182 | 1.2166 | up   |        | AA818085         |
| A_44_P1760<br>63 | 0.0021 | 1.6938 | up   |        | XM_221479        |
| A_44_P8367<br>23 | 0.0113 | 1.2500 | down |        | XM_218819        |
| A_42_P5393<br>52 | 0.0012 | 1.3540 | up   | Adrm1  | NM_031708        |
| A_44_P2157<br>20 | 0.0013 | 2.5968 | up   |        | XM_232746        |
| A_44_P4151<br>49 | 0.0267 | 1.2556 | down |        | CB783186         |
| A_44_P7659<br>23 | 0.0329 | 1.5321 | down |        |                  |
| A_44_P3168<br>39 | 0.0241 | 1.3157 | down | Aars2  | NM_0011068<br>91 |
| A_44_P4188<br>01 | 0.0145 | 1.3243 | up   |        | AI412376         |
| A_44_P5083<br>48 | 0.0246 | 1.3500 | up   | Ahnak  | AF454372         |
| A_44_P7905<br>53 | 0.0006 | 1.2242 | up   |        |                  |
| A_44_P3541<br>24 | 0.0404 | 1.2826 | down | Chmp1b | NM_0011095<br>33 |
| A_44_P3365<br>83 | 0.0139 | 1.7977 | up   |        | AA875598         |
| A_44_P2905<br>59 | 0.0040 | 1.1922 | down | Pabpc4 | NM_0011005<br>38 |
| A_44_P5400<br>82 | 0.0290 | 1.4888 | up   |        | BG664561         |
| A_44_P4685<br>04 | 0.0014 | 1.7264 | up   |        |                  |
| A_44_P8338<br>92 | 0.0049 | 1.3474 | up   |        | AI235737         |
| A_43_P1243<br>8  | 0.0344 | 1.1587 | down | Hmox2  | NM_024387        |
| A_44_P4774<br>84 | 0.0078 | 1.3219 | up   |        | AA859931         |
| A_44_P5179<br>44 | 0.0088 | 1.4784 | up   |        | XM_217706        |
| A_44_P5723<br>20 | 0.0072 | 1.3631 | up   |        | BE101099         |
| A_44_P4967<br>21 | 0.0105 | 1.2941 | down |        | CO572773         |



|                  |        |        |      |        |                  |
|------------------|--------|--------|------|--------|------------------|
| A_43_P1814<br>5  | 0.0395 | 1.1522 | down |        | XR_007342        |
| A_44_P2272<br>43 | 0.0420 | 2.0241 | down | Dapl1  | NM_0011085<br>82 |
| A_44_P2440<br>63 | 0.0360 | 1.4697 | down |        | XR_085956        |
| A_44_P4428<br>67 | 0.0291 | 1.1043 | down | Becn1  | NM_053739        |
| A_44_P2227<br>65 | 0.0255 | 1.1663 | up   |        | XM_342901        |
| A_44_P5326<br>86 | 0.0141 | 1.4551 | up   | Efnb1  | NM_017089        |
| A_44_P7635<br>17 | 0.0055 | 1.2288 | up   |        |                  |
| A_44_P3055<br>72 | 0.0239 | 1.2645 | up   |        | BP489994         |
| A_44_P4210<br>57 | 0.0052 | 1.4630 | up   |        | AI177452         |
| A_44_P4386<br>75 | 0.0322 | 1.3455 | down | Pappa  | NM_0011079<br>39 |
| A_44_P2683<br>25 | 0.0169 | 1.1978 | up   | Ccni   | NM_0011059<br>98 |
| A_44_P8836<br>59 | 0.0024 | 1.1764 | up   |        |                  |
| A_44_P5556<br>64 | 0.0021 | 1.6783 | up   |        | XM_228987        |
| A_44_P5611<br>02 | 0.0029 | 1.7480 | down | Camk2b | NM_0010423<br>54 |
| A_44_P1191<br>53 | 0.0042 | 1.7293 | up   |        |                  |
| A_44_P7389<br>56 | 0.0058 | 1.3544 | up   |        |                  |
| A_42_P7575<br>00 | 0.0155 | 1.2763 | down | Itpr2  | NM_031046        |
| A_43_P1187<br>1  | 0.0036 | 1.3804 | down | Padi3  | NM_017230        |
| A_44_P1347<br>39 | 0.0046 | 1.1475 | down | Csde1  | NM_054006        |
| A_44_P1148<br>43 | 0.0015 | 1.7152 | up   |        | XM_346028        |
| A_44_P3015<br>74 | 0.0140 | 1.1892 | down | Pcnx   | NM_0011703<br>47 |
| A_44_P2143<br>40 | 0.0039 | 1.2641 | up   |        | BG374235         |

|               |        |        |      |           |              |
|---------------|--------|--------|------|-----------|--------------|
| A_44_P898105  | 0.0443 | 1.2794 | up   |           |              |
| A_44_P597706  | 0.0014 | 1.8398 | up   |           | AA875152     |
| A_43_P16086   | 0.0208 | 1.5405 | up   | Cish      | NM_031804    |
| A_44_P917381  | 0.0269 | 1.6037 | down |           | DY471188     |
| A_44_P234309  | 0.0095 | 1.1262 | up   | Smarca5   | NM_001107419 |
| A_44_P375900  | 0.0289 | 1.3689 | down |           | AA866262     |
| A_44_P996410  | 0.0356 | 1.3299 | down | Hspb6     | NM_138887    |
| A_44_P483259  | 0.0003 | 1.6665 | up   | LOC367276 | XM_346049    |
| A_44_P504374  | 0.0165 | 1.0897 | down | Mettl13   | NM_001134501 |
| A_44_P649558  | 0.0434 | 1.6287 | up   |           | BF283594     |
| A_44_P1051631 | 0.0013 | 1.1996 | down | Ilvbl     | NM_001108738 |
| A_44_P982240  | 0.0083 | 2.7002 | up   |           |              |
| A_44_P225860  | 0.0097 | 1.5831 | up   |           | AI598417     |
| A_44_P879099  | 0.0378 | 1.3708 | up   |           | AW915435     |
| A_43_P20024   | 0.0423 | 1.2684 | down | Gpd11     | XM_343498    |
| A_44_P148742  | 0.0447 | 1.2723 | up   |           | AA858676     |
| A_44_P1030594 | 0.0357 | 1.2931 | up   | Cebpg     | NM_012831    |
| A_44_P536365  | 0.0088 | 1.3011 | up   | Nbr1      | NM_001024765 |
| A_44_P182099  | 0.0198 | 1.3461 | down |           | AI030774     |
| A_44_P944832  | 0.0384 | 1.0860 | up   |           | BG671311     |
| A_44_P364447  | 0.0401 | 1.4348 | up   | Spats21   | NM_001014102 |
| A_44_P604422  | 0.0433 | 1.2501 | down |           | AW142685     |

|                  |        |        |      |                |                  |
|------------------|--------|--------|------|----------------|------------------|
| A_44_P9860<br>18 | 0.0348 | 1.3966 | down |                | BF420742         |
| A_43_P1706<br>5  | 0.0340 | 1.1996 | up   | Helz           | NM_0011058<br>48 |
| A_44_P4854<br>09 | 0.0053 | 1.7151 | up   |                |                  |
| A_44_P1968<br>05 | 0.0277 | 1.2801 | down | Golga7         | NM_0010077<br>31 |
| A_43_P1004<br>0  | 0.0256 | 1.2523 | down |                | AW921534         |
| A_44_P4978<br>63 | 0.0005 | 1.4532 | down | Dpfl           | NM_0011057<br>29 |
| A_44_P4080<br>11 | 0.0047 | 1.1511 | up   | Fusip1         | NM_0010257<br>38 |
| A_44_P4988<br>90 | 0.0341 | 1.1653 | down | Acadvl         | NM_012891        |
| A_44_P5390<br>19 | 0.0111 | 1.2624 | up   | Qser1          | NM_0011394<br>93 |
| A_44_P5497<br>06 | 0.0267 | 1.2589 | up   |                | AI547541         |
| A_44_P3332<br>81 | 0.0132 | 1.8335 | up   | LOC680967      | XM_0027301<br>37 |
| A_44_P4849<br>09 | 0.0403 | 1.7358 | down | P2rx4          | NM_031594        |
| A_44_P4563<br>42 | 0.0007 | 1.8983 | up   | Dyrk2          | NM_0011081<br>00 |
| A_44_P2313<br>99 | 0.0149 | 1.1574 | down | Samm50         | NM_0010042<br>41 |
| A_44_P3186<br>04 | 0.0266 | 1.4394 | down | Vps33a         | NM_022961        |
| A_44_P2124<br>24 | 0.0411 | 1.2115 | down | RGD156021<br>2 | NM_0010776<br>76 |
| A_44_P6380<br>87 | 0.0286 | 1.1347 | down |                | DY471385         |
| A_44_P3347<br>17 | 0.0312 | 1.4467 | down | Klc3           | NM_138520        |
| A_44_P1909<br>99 | 0.0333 | 1.2268 | up   |                | BF281299         |
| A_44_P5524<br>26 | 0.0007 | 1.4453 | up   |                | AA997760         |
| A_44_P2180<br>23 | 0.0080 | 1.2792 | up   |                | XM_215586        |
| A_44_P3980<br>14 | 0.0050 | 1.2115 | down | Hdac3          | NM_053448        |

|                  |        |        |      |                |                  |
|------------------|--------|--------|------|----------------|------------------|
| A_44_P7310<br>07 | 0.0260 | 1.2583 | up   |                | CK479210         |
| A_44_P1782<br>13 | 0.0047 | 1.2786 | down | Sobpl          | NM_0011046<br>40 |
| A_42_P5619<br>30 | 0.0261 | 1.1892 | up   |                | BC104705         |
| A_44_P7913<br>22 | 0.0010 | 1.8168 | up   |                |                  |
| A_44_P4321<br>83 | 0.0009 | 1.7817 | up   |                | BG153306         |
| A_44_P2551<br>09 | 0.0409 | 1.1326 | down | Snn            | NM_0010340<br>83 |
| A_44_P3142<br>60 | 0.0230 | 2.1014 | up   |                |                  |
| A_42_P5378<br>81 | 0.0436 | 1.1663 | up   | Itpa           | NM_0011077<br>74 |
| A_44_P1805<br>96 | 0.0244 | 1.2759 | up   |                | XM_228527        |
| A_44_P5347<br>81 | 0.0206 | 1.5675 | up   | RGD156455<br>0 | XM_220862        |
| A_44_P2208<br>68 | 0.0128 | 1.1882 | up   | Rpn2           | NM_031698        |
| A_44_P4399<br>56 | 0.0467 | 1.2561 | down | Itp2           | NM_031046        |
| A_44_P4633<br>02 | 0.0136 | 1.1006 | down | Mrps28         | NM_0010479<br>09 |
| A_44_P1064<br>33 | 0.0067 | 1.5392 | up   |                | AI410419         |
| A_44_P3001<br>00 | 0.0013 | 1.2592 | down | Pex10          | NM_0011094<br>05 |
| A_44_P2366<br>70 | 0.0463 | 1.6322 | down | LOC691410      | XM_0010781<br>25 |
| A_43_P1273<br>7  | 0.0310 | 1.1653 | down | Hagh           | NM_033349        |
| A_44_P2880<br>91 | 0.0046 | 7.0691 | up   | P2rx2          | NM_053656        |
| A_44_P2788<br>43 | 0.0015 | 1.5433 | up   |                | XM_217505        |
| A_44_P6685<br>82 | 0.0010 | 1.8610 | up   | Arhgap25       | NM_0011092<br>47 |
| A_44_P5415<br>05 | 0.0296 | 1.6845 | down |                | XM_0010672<br>41 |
| A_44_P1935<br>93 | 0.0145 | 1.4083 | up   |                | BP471069         |

|                  |        |        |      |                |                  |
|------------------|--------|--------|------|----------------|------------------|
| A_44_P3833<br>60 | 0.0060 | 1.3151 | down | Trim2          | NM_0011085<br>52 |
| A_44_P9143<br>46 | 0.0352 | 1.1477 | down |                | XM_0010628<br>05 |
| A_44_P8213<br>86 | 0.0273 | 2.2267 | down |                |                  |
| A_44_P6522<br>43 | 0.0213 | 1.4375 | up   |                |                  |
| A_44_P7907<br>50 | 0.0155 | 1.3860 | up   |                |                  |
| A_44_P3895<br>06 | 0.0461 | 1.2601 | down | RGD130810<br>1 | NM_0011144<br>02 |
| A_44_P2920<br>82 | 0.0034 | 1.2596 | up   |                | AI071579         |
| A_44_P8219<br>72 | 0.0168 | 1.5544 | up   |                |                  |
| A_44_P5167<br>45 | 0.0043 | 1.2529 | down | Acaa1          | NM_012489        |
| A_43_P2215<br>5  | 0.0409 | 1.4463 | down | Optc           | NM_0011071<br>76 |
| A_44_P4909<br>54 | 0.0219 | 1.0990 | up   |                | XR_005671        |
| A_44_P3907<br>34 | 0.0073 | 1.3925 | down |                | AW143618         |
| A_44_P3843<br>89 | 0.0014 | 2.0956 | up   | LOC691211      |                  |
| A_42_P5150<br>28 | 0.0211 | 2.1427 | down | Alpk2          | XM_574162        |
| A_44_P4865<br>59 | 0.0320 | 1.3112 | up   |                | AW532049         |
| A_44_P4736<br>48 | 0.0296 | 1.5125 | up   |                | XM_213132        |
| A_44_P3429<br>66 | 0.0485 | 1.3227 | down | Rwdd3          | NM_0011281<br>52 |
| A_44_P1228<br>97 | 0.0355 | 1.3713 | up   |                | CA506280         |
| A_42_P5333<br>12 | 0.0037 | 1.3163 | down | Pc             | NM_012744        |
| A_44_P7173<br>49 | 0.0031 | 1.2266 | up   |                |                  |
| A_42_P5019<br>72 | 0.0458 | 1.1283 | down | Ppp2r1b        | NM_0010254<br>18 |
| A_44_P5255<br>57 | 0.0004 | 1.2352 | down | Fam108a1       | NM_0010069<br>83 |

|                   |        |        |      |           |                  |
|-------------------|--------|--------|------|-----------|------------------|
| A_44_P8718<br>82  | 0.0498 | 1.3310 | up   |           |                  |
| A_44_P2387<br>33  | 0.0000 | 1.7384 | up   | Tmed5     | NM_0010076<br>19 |
| A_44_P8958<br>29  | 0.0458 | 1.3523 | up   |           | AI043705         |
| A_44_P8457<br>05  | 0.0344 | 1.1745 | up   |           | CB728414         |
| A_44_P7265<br>68  | 0.0284 | 1.2754 | down | Ptpn3     | BC103629         |
| A_44_P1051<br>799 | 0.0459 | 1.1689 | down |           | XM_0027257<br>83 |
| A_44_P3139<br>18  | 0.0367 | 1.2513 | down | Wdr42a    | NM_0010142<br>31 |
| A_44_P3873<br>85  | 0.0347 | 1.2675 | up   |           | BM389833         |
| A_44_P5617<br>60  | 0.0153 | 1.2585 | down |           |                  |
| A_44_P5484<br>40  | 0.0218 | 2.9019 | down | Fndc7     | NM_0011077<br>17 |
| A_44_P3672<br>43  | 0.0359 | 1.1582 | up   | Ypel5     | NM_0010352<br>21 |
| A_44_P3144<br>31  | 0.0160 | 1.4824 | down | Ccdc64b   | NM_0011069<br>82 |
| A_44_P1923<br>36  | 0.0147 | 1.4792 | up   | Tspan9    | NM_0011078<br>90 |
| A_44_P1461<br>92  | 0.0344 | 1.2605 | up   |           | AI176752         |
| A_44_P1055<br>774 | 0.0343 | 1.7817 | up   |           | AA923925         |
| A_44_P1758<br>46  | 0.0363 | 1.4601 | up   | LOC307671 | XM_226278        |
| A_43_P1030<br>2   | 0.0121 | 1.6419 | down |           | CB548020         |
| A_44_P9762<br>96  | 0.0046 | 1.3306 | up   |           |                  |
| A_44_P2719<br>23  | 0.0454 | 1.4587 | down | Rom1      | NM_0010096<br>90 |
| A_42_P5357<br>43  | 0.0131 | 1.1276 | down | Galnt11   | NM_199393        |
| A_44_P4443<br>39  | 0.0408 | 1.2557 | up   | Larp1     | XM_220446        |
| A_44_P6298<br>97  | 0.0207 | 1.2940 | up   |           | BF552300         |

|                   |        |        |      |                |                  |
|-------------------|--------|--------|------|----------------|------------------|
| A_44_P6675<br>09  | 0.0267 | 1.2244 | up   |                |                  |
| A_44_P1112<br>55  | 0.0494 | 1.3627 | up   |                | AI029306         |
| A_42_P5633<br>76  | 0.0229 | 1.2512 | down | Pcyox1         | AF332142         |
| A_44_P4967<br>88  | 0.0187 | 1.2451 | up   | Fip111         | NM_0010082<br>95 |
| A_44_P2788<br>10  | 0.0493 | 1.1574 | up   |                | XM_0027256<br>29 |
| A_44_P4266<br>72  | 0.0473 | 1.1385 | down | Bcas2          | NM_0011064<br>58 |
| A_44_P2366<br>36  | 0.0077 | 1.4836 | up   |                |                  |
| A_44_P8191<br>69  | 0.0089 | 1.5244 | up   |                | AA997848         |
| A_44_P1045<br>526 | 0.0219 | 1.3663 | up   | Piga           | NM_0011088<br>16 |
| A_44_P3448<br>16  | 0.0271 | 1.2852 | down | Smox           | NM_0011348<br>54 |
| A_44_P3836<br>79  | 0.0429 | 1.2782 | down |                | AA998008         |
| A_44_P1656<br>43  | 0.0397 | 1.9872 | down | Sptb           | AY238343         |
| A_44_P4448<br>97  | 0.0060 | 1.2721 | up   | Ranbp2         | XM_215401        |
| A_44_P1346<br>85  | 0.0488 | 1.1227 | up   | Tpm3           | NM_173111        |
| A_44_P6525<br>50  | 0.0002 | 1.8238 | up   |                |                  |
| A_44_P1039<br>18  | 0.0407 | 1.3084 | up   |                | AA944422         |
| A_43_P1163<br>6   | 0.0453 | 1.1668 | up   | Hspe1          | NM_012966        |
| A_44_P6231<br>15  | 0.0484 | 1.3684 | up   | Slc43a2        | NM_0011058<br>12 |
| A_44_P3469<br>38  | 0.0385 | 1.3609 | down | RGD130931<br>3 | NM_0010140<br>30 |
| A_44_P5445<br>52  | 0.0203 | 1.1427 | down | Usp3           | NM_0010254<br>24 |
| A_44_P2314<br>39  | 0.0385 | 1.8399 | down | Slc39a11       | NM_0010130<br>42 |
| A_44_P2596<br>54  | 0.0094 | 2.0835 | up   |                | BF401583         |

|                   |        |        |      |        |                  |
|-------------------|--------|--------|------|--------|------------------|
| A_44_P5935<br>25  | 0.0403 | 1.1601 | up   |        | XR_007360        |
| A_44_P5565<br>79  | 0.0208 | 1.3109 | down | H1fx   | XM_575600        |
| A_44_P1654<br>04  | 0.0315 | 1.4314 | up   |        | BE111651         |
| A_44_P4674<br>23  | 0.0100 | 1.2011 | up   |        | AA923914         |
| A_43_P1086<br>7   | 0.0160 | 1.6546 | down |        | CB547678         |
| A_43_P1013<br>9   | 0.0494 | 1.1381 | up   |        | CB547604         |
| A_44_P7909<br>28  | 0.0046 | 1.4205 | up   |        |                  |
| A_44_P6382<br>64  | 0.0327 | 1.0998 | down |        |                  |
| A_44_P4102<br>32  | 0.0248 | 1.2741 | up   | Dmtf1  | NM_053693        |
| A_44_P1046<br>697 | 0.0380 | 1.1929 | down | Ctdsp1 | NM_0011280<br>79 |
| A_44_P1089<br>82  | 0.0444 | 1.1687 | down | Sucla2 | NM_0011083<br>87 |
| A_44_P5010<br>51  | 0.0494 | 1.2343 | down |        | AY383698         |
| A_44_P8251<br>42  | 0.0455 | 1.3297 | down |        |                  |
| A_44_P1929<br>88  | 0.0303 | 1.2654 | down | Csnk1e | NM_031617        |
| A_44_P5700<br>46  | 0.0292 | 1.1376 | up   |        | CB586512         |
| A_44_P2932<br>64  | 0.0210 | 1.5025 | up   |        | XR_006781        |
| A_44_P2145<br>95  | 0.0208 | 1.2568 | up   |        | AI059015         |
| A_44_P2502<br>13  | 0.0215 | 1.2264 | down | Rab4a  | NM_013019        |
| A_43_P2331<br>9   | 0.0243 | 1.5609 | down | Usp13  | NM_0011076<br>65 |
| A_44_P9962<br>04  | 0.0064 | 1.2355 | up   |        | XM_233944        |
| A_44_P9742<br>03  | 0.0004 | 1.7404 | up   |        |                  |
| A_44_P1958<br>17  | 0.0087 | 1.2302 | up   |        | AA850940         |



|                  |        |        |      |                |                  |
|------------------|--------|--------|------|----------------|------------------|
| A_43_P1970<br>6  | 0.0383 | 3.0346 | down | Actn2          | NM_0011703<br>25 |
| A_44_P4827<br>85 | 0.0186 | 1.1959 | down | Znf511         | NM_0011063<br>09 |
| A_44_P5382<br>07 | 0.0287 | 1.4309 | up   |                | BF397290         |
| A_44_P2431<br>11 | 0.0224 | 1.2450 | down | Rab3d          | NM_080580        |
| A_44_P6511<br>51 | 0.0026 | 1.6032 | up   |                | AA800851         |
| A_44_P3583<br>84 | 0.0135 | 1.2152 | up   | Dlat           | NM_031025        |
| A_44_P8679<br>00 | 0.0286 | 1.4909 | up   |                |                  |
| A_44_P2454<br>27 | 0.0232 | 1.2718 | up   | Trim39         | NM_213562        |
| A_44_P2317<br>37 | 0.0013 | 1.3596 | up   | RGD156275<br>5 | XM_0010554<br>03 |
| A_42_P6036<br>70 | 0.0342 | 1.1624 | down |                | XR_008618        |
| A_44_P4764<br>91 | 0.0050 | 1.7042 | up   |                | XM_0010566<br>42 |
| A_44_P3482<br>44 | 0.0127 | 1.5982 | up   | Nadsyn1        | BC101923         |
| A_44_P3892<br>12 | 0.0118 | 1.8699 | down | Morn4          | NM_0010249<br>75 |
| A_44_P3397<br>22 | 0.0444 | 1.3605 | down | Cdh11          | NM_053392        |
| A_44_P2869<br>11 | 0.0444 | 1.0797 | up   | Mapk14         | NM_031020        |
| A_43_P1862<br>6  | 0.0159 | 1.3008 | up   | Atm            | NM_0011068<br>21 |
| A_44_P6213<br>38 | 0.0036 | 1.3505 | up   | Zfp458         | NM_0010242<br>99 |
| A_43_P2336<br>1  | 0.0373 | 1.2979 | down | Aen            | NM_0011084<br>87 |
| A_43_P1853<br>7  | 0.0090 | 1.3227 | down | Eml6           | XM_573680        |
| A_44_P5989<br>44 | 0.0442 | 1.4412 | down |                | AW143747         |
| A_44_P5457<br>17 | 0.0103 | 1.7468 | down | Cacna1e        | NM_019294        |
| A_44_P3703<br>45 | 0.0055 | 1.2635 | up   | Aftph          | XM_223651        |

|                   |        |        |      |        |                  |
|-------------------|--------|--------|------|--------|------------------|
| A_43_P1286<br>4   | 0.0241 | 1.3118 | down | Pgf    | NM_053595        |
| A_43_P1890<br>7   | 0.0246 | 1.3447 | down | Lrig1  | XM_232237        |
| A_43_P1577<br>5   | 0.0035 | 1.1544 | up   | Ddx21  | NM_0010372<br>01 |
| A_44_P2369<br>30  | 0.0319 | 1.0909 | up   |        | CB606450         |
| A_44_P3563<br>44  | 0.0010 | 1.8172 | up   | Ndufc2 | NM_0010092<br>90 |
| A_44_P9426<br>09  | 0.0496 | 1.2688 | up   |        | BF289902         |
| A_44_P3326<br>75  | 0.0039 | 1.5274 | down | Myh13  | AF075250         |
| A_42_P5929<br>81  | 0.0367 | 1.4258 | down | Mfap2  | NM_0011079<br>89 |
| A_44_P3307<br>26  | 0.0326 | 1.1550 | down | Sfrs14 | NM_0011083<br>97 |
| A_44_P3999<br>63  | 0.0149 | 1.1887 | up   |        | BM392140         |
| A_43_P1797<br>6   | 0.0256 | 1.3347 | down | Krba1  | BC103730         |
| A_44_P1291<br>40  | 0.0084 | 1.2585 | up   |        | BQ199204         |
| A_44_P1114<br>53  | 0.0342 | 1.3926 | up   | Armc1  | NM_0011064<br>25 |
| A_42_P4988<br>68  | 0.0105 | 1.4744 | down | Fsd1   | BC160924         |
| A_44_P2295<br>37  | 0.0270 | 1.2498 | down | Epc2   | NM_0011085<br>81 |
| A_44_P1045<br>612 | 0.0045 | 1.2500 | down | Fxyd3  | NM_172317        |
| A_44_P1608<br>72  | 0.0378 | 1.4788 | down | Rap2a  | NM_053741        |
| A_44_P3060<br>80  | 0.0183 | 1.3163 | up   |        | AI102825         |
| A_44_P4132<br>65  | 0.0200 | 1.1223 | down |        | AA875527         |
| A_44_P2813<br>93  | 0.0447 | 1.1914 | up   |        | XM_344684        |
| A_44_P4569<br>23  | 0.0072 | 1.3700 | down | Cblc   | NM_0010349<br>20 |
| A_44_P1463<br>35  | 0.0194 | 1.2411 | up   |        | CA505434         |

|                  |        |        |      |           |                  |
|------------------|--------|--------|------|-----------|------------------|
| A_44_P1469<br>22 | 0.0194 | 7.5350 | up   |           | L07408           |
| A_43_P1274<br>0  | 0.0454 | 1.2788 | down | Eef1a1    | NM_175838        |
| A_44_P2532<br>68 | 0.0213 | 1.2762 | up   |           | XM_221603        |
| A_44_P4612<br>01 | 0.0067 | 1.4343 | up   | Pcsk7     | NM_019246        |
| A_44_P2409<br>30 | 0.0098 | 1.2438 | down | Scamp2    | NM_023955        |
| A_44_P6048<br>60 | 0.0258 | 1.1517 | down |           | BC098774         |
| A_44_P3404<br>34 | 0.0063 | 1.4473 | down | Ttc38     | NM_0011304<br>99 |
| A_44_P8407<br>78 | 0.0278 | 1.1696 | down | Dnajb6    | NM_0010132<br>09 |
| A_44_P1282<br>02 | 0.0222 | 3.9650 | up   |           | M87788           |
| A_42_P7517<br>20 | 0.0171 | 1.4356 | down | LOC683720 | XR_009563        |
| A_42_P5866<br>81 | 0.0153 | 1.1701 | down | Upf2      | NM_0011084<br>21 |
| A_44_P5104<br>70 | 0.0068 | 1.6633 | down | Pex11a    | NM_053487        |
| A_44_P1451<br>91 | 0.0064 | 1.8528 | down |           |                  |
| A_43_P1253<br>4  | 0.0484 | 1.1816 | down | Thra      | NM_0010179<br>60 |
| A_44_P2282<br>11 | 0.0428 | 1.3149 | up   |           | AI177092         |
| A_43_P1659<br>9  | 0.0363 | 1.1654 | down | Rdh14     | NM_0011092<br>76 |
| A_44_P6670<br>69 | 0.0372 | 1.1640 | up   | Qsox2     | NM_0011094<br>34 |
| A_44_P9778<br>65 | 0.0012 | 1.1816 | down |           |                  |
| A_44_P4545<br>91 | 0.0190 | 1.2145 | up   | Fam120b   | NM_0011074<br>66 |
| A_44_P1173<br>35 | 0.0197 | 1.3899 | up   |           | XR_008794        |
| A_44_P6713<br>40 | 0.0387 | 1.2141 | down |           | XR_006448        |
| A_44_P2849<br>54 | 0.0235 | 1.2106 | up   |           | NM_0011087<br>04 |

|                  |        |        |      |        |                  |
|------------------|--------|--------|------|--------|------------------|
| A_44_P5725<br>04 | 0.0157 | 1.4760 | up   |        | AA850577         |
| A_44_P4828<br>59 | 0.0298 | 1.4360 | down | Sema5a | NM_0011076<br>59 |
| A_44_P1711<br>43 | 0.0044 | 1.3291 | up   |        | XM_229366        |
| A_44_P1094<br>55 | 0.0303 | 1.2759 | down | Gstm2  | NM_177426        |
| A_44_P4597<br>41 | 0.0134 | 1.1744 | down | Hexa   | NM_0010044<br>43 |
| A_44_P3776<br>45 | 0.0266 | 1.2930 | down |        | XM_342774        |
| A_43_P1302<br>5  | 0.0306 | 1.3881 | down | Gas6   | NM_057100        |
| A_44_P2458<br>25 | 0.0030 | 1.6006 | up   |        | XM_345039        |
| A_44_P1087<br>59 | 0.0079 | 1.7716 | up   |        | BM388124         |
| A_44_P8555<br>00 | 0.0023 | 1.5480 | up   |        |                  |
| A_44_P1510<br>37 | 0.0338 | 1.6313 | up   |        | AI044707         |
| A_44_P1619<br>05 | 0.0440 | 1.7139 | up   |        | BQ193155         |
| A_44_P1709<br>71 | 0.0365 | 1.2234 | up   |        |                  |
| A_44_P9143<br>57 | 0.0283 | 2.3276 | down |        |                  |
| A_44_P8990<br>02 | 0.0068 | 1.2004 | up   |        |                  |
| A_44_P6389<br>87 | 0.0211 | 1.2606 | up   |        | DV717005         |
| A_44_P1568<br>95 | 0.0025 | 1.6025 | down | Sall3  | NM_0011088<br>92 |
| A_43_P1098<br>8  | 0.0054 | 1.3095 | down | Nek7   | NM_0011083<br>46 |
| A_44_P4419<br>66 | 0.0190 | 1.4535 | up   |        | H31108           |
| A_44_P4875<br>30 | 0.0026 | 1.4676 | down | Tmem56 | NM_0011358<br>79 |
| A_44_P8066<br>41 | 0.0410 | 1.4382 | up   |        | XM_236024        |
| A_44_P9593<br>99 | 0.0416 | 1.1600 | up   | Sar1a  | NM_0010077<br>39 |

|                   |        |        |      |                |                  |
|-------------------|--------|--------|------|----------------|------------------|
| A_44_P1996<br>24  | 0.0440 | 1.2532 | down | Bad            | NM_022698        |
| A_44_P4501<br>49  | 0.0044 | 1.1415 | up   | RGD156192<br>8 | XM_0010673<br>10 |
| A_44_P4446<br>19  | 0.0215 | 1.2436 | up   |                | BQ781880         |
| A_44_P1099<br>93  | 0.0331 | 1.3022 | down |                | XM_224713        |
| A_44_P4406<br>33  | 0.0237 | 1.3295 | down | Dlg3           | NM_031639        |
| A_44_P9866<br>36  | 0.0118 | 1.1470 | down |                | DY472436         |
| A_44_P1815<br>18  | 0.0473 | 1.1964 | down | Ctnnbip1       | NM_0011733<br>88 |
| A_44_P3720<br>61  | 0.0142 | 1.2583 | down | Cyp2d4         | NM_138515        |
| A_44_P1443<br>93  | 0.0130 | 1.2517 | down | Ip6k2          | NM_021660        |
| A_44_P7461<br>89  | 0.0145 | 1.4115 | down |                |                  |
| A_44_P1672<br>34  | 0.0012 | 2.0227 | up   |                | AI230614         |
| A_43_P1493<br>1   | 0.0079 | 1.1226 | up   | Nfe2l2         | NM_031789        |
| A_44_P2642<br>30  | 0.0444 | 1.1429 | down | Ankrd13c       | XM_0010621<br>65 |
| A_44_P1040<br>055 | 0.0085 | 1.2725 | up   | Azi2           | NM_0010257<br>05 |
| A_43_P1222<br>2   | 0.0284 | 1.0833 | down | Pmpcb          | NM_022395        |
| A_44_P3803<br>29  | 0.0023 | 2.0505 | up   |                |                  |
| A_44_P5267<br>95  | 0.0001 | 2.8993 | up   | Tshz1          | XM_225688        |
| A_44_P9952<br>18  | 0.0149 | 1.1851 | up   |                | XM_0010547<br>97 |
| A_44_P3357<br>52  | 0.0222 | 1.3001 | down | RGD130600<br>0 | NM_0011088<br>27 |
| A_43_P1957<br>8   | 0.0240 | 1.2382 | up   | Noc3l          | NM_0011085<br>23 |
| A_44_P9911<br>14  | 0.0312 | 1.1153 | up   | Pds5b          | NM_0011023<br>83 |
| A_44_P4377<br>21  | 0.0495 | 1.2195 | down |                | CO566833         |

|                   |        |        |      |                |                  |
|-------------------|--------|--------|------|----------------|------------------|
| A_42_P4953<br>97  | 0.0446 | 1.0803 | up   | Rpl21          | NM_053330        |
| A_44_P6301<br>22  | 0.0217 | 1.2658 | up   |                |                  |
| A_44_P5270<br>18  | 0.0374 | 1.4382 | up   | Olr386         | NM_0010008<br>56 |
| A_44_P4135<br>40  | 0.0164 | 1.2120 | down |                | EX488580         |
| A_44_P1030<br>501 | 0.0418 | 1.1277 | down | Ccdc124        | NM_0011060<br>71 |
| A_44_P8556<br>72  | 0.0494 | 1.8077 | up   |                |                  |
| A_44_P7674<br>45  | 0.0147 | 1.3051 | up   |                |                  |
| A_44_P5751<br>73  | 0.0253 | 1.2757 | up   |                |                  |
| A_44_P3884<br>37  | 0.0439 | 1.8251 | up   |                | BG378180         |
| A_44_P7420<br>86  | 0.0278 | 1.3992 | up   |                | AI639039         |
| A_44_P7945<br>08  | 0.0034 | 1.3368 | down |                |                  |
| A_44_P5076<br>73  | 0.0433 | 1.3676 | down |                | AA891542         |
| A_44_P2771<br>67  | 0.0267 | 1.3133 | up   |                | BE109711         |
| A_44_P3340<br>03  | 0.0251 | 1.4115 | up   |                | BI302750         |
| A_43_P1789<br>0   | 0.0261 | 1.1982 | down | Fam198a        | CB606389         |
| A_44_P3611<br>44  | 0.0064 | 1.5822 | down | Nacc2          | NM_0011005<br>33 |
| A_44_P3117<br>97  | 0.0344 | 1.8563 | down | Cpxml          | NM_0011065<br>11 |
| A_43_P1866<br>4   | 0.0083 | 1.2562 | down | RGD131109<br>5 | NM_0011345<br>32 |
| A_44_P1350<br>82  | 0.0389 | 1.4590 | down | P2rx1          | NM_012997        |
| A_44_P4622<br>18  | 0.0416 | 1.3573 | up   |                | BQ195521         |
| A_44_P3746<br>20  | 0.0158 | 1.3446 | down | Cdkn1c         | NM_182735        |
| A_44_P9655<br>38  | 0.0396 | 1.9134 | up   |                | AI029706         |

|                   |        |        |      |           |                  |
|-------------------|--------|--------|------|-----------|------------------|
| A_44_P1890<br>43  | 0.0044 | 1.2581 | down | Gphn      | NM_022865        |
| A_44_P3387<br>03  | 0.0406 | 1.1674 | down |           | AW918458         |
| A_44_P3109<br>60  | 0.0130 | 1.1901 | up   |           | M59859           |
| A_44_P2668<br>79  | 0.0145 | 1.1493 | down | Rdbp      | NM_212548        |
| A_44_P2720<br>48  | 0.0076 | 1.1663 | up   |           | XM_0027284<br>48 |
| A_44_P1165<br>97  | 0.0344 | 1.2920 | down | Cx3cl1    | NM_134455        |
| A_44_P2108<br>83  | 0.0266 | 1.1782 | down | Btbd3     | NM_0011077<br>82 |
| A_44_P7517<br>48  | 0.0040 | 1.6389 | up   |           |                  |
| A_44_P6061<br>12  | 0.0160 | 1.1039 | up   |           | BC107915         |
| A_44_P1014<br>005 | 0.0090 | 1.2678 | up   | Cdc42se1  | NM_0010390<br>44 |
| A_44_P2417<br>05  | 0.0001 | 2.1313 | up   |           | BG668296         |
| A_44_P4389<br>04  | 0.0386 | 1.2502 | down | Cldn8     | NM_0010377<br>74 |
| A_44_P9735<br>51  | 0.0401 | 1.1781 | up   |           | AI101150         |
| A_44_P2932<br>83  | 0.0156 | 1.2633 | up   |           | XM_234433        |
| A_42_P5169<br>41  | 0.0196 | 1.2033 | up   | Ube4b     | XM_233679        |
| A_44_P1816<br>40  | 0.0126 | 1.2957 | up   |           | AI136692         |
| A_44_P1937<br>72  | 0.0408 | 1.1832 | up   |           | AA818945         |
| A_43_P1324<br>4   | 0.0003 | 1.4065 | up   | Rap1b     | U07795           |
| A_44_P2307<br>80  | 0.0371 | 1.2208 | up   |           | AI010145         |
| A_44_P2250<br>97  | 0.0136 | 1.0814 | down | LOC689226 | NM_0011275<br>73 |
| A_43_P1922<br>4   | 0.0290 | 1.4320 | down | Zhx3      | NM_0010470<br>97 |
| A_43_P1318<br>3   | 0.0076 | 1.1144 | down | Syf2      | NM_133417        |

|                  |        |        |      |                |                  |
|------------------|--------|--------|------|----------------|------------------|
| A_44_P7625<br>96 | 0.0447 | 1.6344 | up   | Mars2          | XM_237156        |
| A_44_P4521<br>86 | 0.0232 | 3.0635 | up   |                | AF347030         |
| A_44_P2012<br>95 | 0.0477 | 1.2563 | down | Mybpc2         | NM_0011062<br>57 |
| A_44_P2219<br>80 | 0.0139 | 1.4364 | up   | Cdc21l         | NM_145766        |
| A_43_P2051<br>5  | 0.0103 | 1.2683 | down | Zfand1         | XM_342213        |
| A_44_P4607<br>02 | 0.0172 | 1.1897 | up   |                | BQ207841         |
| A_44_P3722<br>51 | 0.0223 | 1.4266 | down | Bcan           | NM_012916        |
| A_44_P5290<br>82 | 0.0372 | 1.2796 | up   |                | AI411809         |
| A_44_P9295<br>74 | 0.0276 | 1.7849 | down |                |                  |
| A_44_P7921<br>43 | 0.0117 | 1.1768 | down |                | AW920896         |
| A_44_P2476<br>15 | 0.0002 | 1.4523 | up   | Trio           | NM_0011076<br>58 |
| A_44_P4043<br>36 | 0.0232 | 1.4585 | up   |                | AA925866         |
| A_44_P3402<br>61 | 0.0282 | 1.5362 | down | RGD130580<br>7 | NM_0010252<br>76 |
| A_44_P1934<br>05 | 0.0155 | 1.2688 | up   |                | AW528582         |
| A_44_P5436<br>11 | 0.0078 | 1.3825 | down |                | XM_344411        |
| A_44_P5586<br>36 | 0.0063 | 1.2616 | up   | Ppp1r9b        | NM_053474        |
| A_43_P1926<br>7  | 0.0490 | 1.0720 | down | Riok2          | NM_0010096<br>87 |
| A_44_P8376<br>69 | 0.0010 | 1.2079 | up   | Abce1          | NM_0011084<br>46 |
| A_44_P6995<br>23 | 0.0353 | 1.2239 | up   |                |                  |
| A_44_P2274<br>21 | 0.0110 | 1.3159 | up   |                |                  |
| A_44_P3458<br>41 | 0.0021 | 1.3878 | up   |                | BI275582         |
| A_44_P7408<br>45 | 0.0079 | 1.2321 | up   |                | E00898           |



|                   |        |        |      |        |                  |
|-------------------|--------|--------|------|--------|------------------|
| A_44_P2402<br>92  | 0.0073 | 1.3733 | up   |        | AI556244         |
| A_43_P1231<br>1   | 0.0341 | 1.3847 | up   | Srd5a2 | NM_022711        |
| A_44_P3823<br>18  | 0.0286 | 1.2648 | up   | Pftk1  | NM_0011086<br>17 |
| A_44_P2777<br>75  | 0.0002 | 2.8287 | up   |        | AI105643         |
| A_44_P2042<br>71  | 0.0174 | 1.2557 | up   |        | EV775538         |
| A_43_P1967<br>3   | 0.0431 | 1.4084 | down | Lrba   | NM_0011085<br>55 |
| A_44_P5228<br>27  | 0.0397 | 1.5658 | down | Htra3  | XM_341237        |
| A_44_P5970<br>13  | 0.0221 | 1.1605 | up   |        |                  |
| A_44_P4112<br>80  | 0.0343 | 1.1969 | up   |        | AI012428         |
| A_44_P1059<br>322 | 0.0023 | 1.5634 | up   | Whdc1  | NM_0011307<br>28 |
| A_43_P1296<br>7   | 0.0413 | 1.3545 | down | Cap2   | NM_053874        |
| A_44_P1218<br>39  | 0.0094 | 1.6863 | up   |        | XM_345657        |
| A_44_P2883<br>59  | 0.0080 | 1.6881 | up   |        | XM_223826        |
| A_44_P7935<br>91  | 0.0177 | 1.2668 | down |        | XM_0027254<br>40 |
| A_44_P1612<br>08  | 0.0110 | 1.2553 | down |        | XM_230955        |
| A_44_P1080<br>17  | 0.0219 | 1.6212 | down | Nphp3  | XM_343461        |
| A_44_P1016<br>84  | 0.0023 | 1.2315 | up   |        | AW916490         |
| A_44_P2828<br>43  | 0.0168 | 1.8290 | up   | Dhx32  | NM_0011300<br>39 |
| A_42_P7631<br>57  | 0.0243 | 1.2716 | down | Cyp2t1 | NM_134369        |
| A_44_P9580<br>51  | 0.0472 | 1.0924 | down |        | AW919166         |
| A_44_P1580<br>59  | 0.0439 | 1.1535 | up   |        | AI171503         |
| A_42_P6877<br>67  | 0.0353 | 1.1206 | down | Dnlz   | NM_0011309<br>90 |

|                  |        |        |      |           |                  |
|------------------|--------|--------|------|-----------|------------------|
| A_44_P9962<br>68 | 0.0121 | 1.4547 | up   | Rasd2     | NM_133568        |
| A_42_P7002<br>09 | 0.0279 | 2.2008 | up   | Slc7a3    | NM_017217        |
| A_44_P5360<br>89 | 0.0470 | 1.7284 | up   | Klre1     | NM_181372        |
| A_44_P2435<br>56 | 0.0309 | 1.1281 | up   |           | XM_225514        |
| A_43_P1010<br>1  | 0.0305 | 1.2471 | down |           |                  |
| A_44_P2271<br>21 | 0.0251 | 1.3652 | down | Txndc16   | XM_341301        |
| A_44_P2504<br>14 | 0.0267 | 1.1125 | down |           | CV117922         |
| A_44_P3358<br>16 | 0.0035 | 1.2922 | up   |           | AA924717         |
| A_44_P3909<br>10 | 0.0065 | 1.4739 | up   |           | AA946072         |
| A_42_P4577<br>73 | 0.0241 | 1.1950 | down | Txndc15   | NM_0010249<br>98 |
| A_44_P1486<br>03 | 0.0084 | 1.6598 | up   |           | AI043899         |
| A_44_P4993<br>18 | 0.0209 | 1.5133 | up   | LOC294154 | NM_0010396<br>07 |
| A_44_P7762<br>09 | 0.0090 | 1.3343 | up   |           | XM_0010531<br>32 |
| A_44_P8685<br>73 | 0.0430 | 1.1604 | up   | Chmp7     | NM_0011088<br>72 |
| A_44_P5559<br>85 | 0.0031 | 1.4762 | up   |           | BI284716         |
| A_44_P3615<br>82 | 0.0195 | 1.4840 | up   |           | AA925871         |
| A_44_P4827<br>53 | 0.0289 | 1.3395 | down |           | XM_218993        |
| A_44_P2368<br>47 | 0.0258 | 1.2756 | up   | Efnb3     | NM_0011009<br>80 |
| A_44_P6839<br>03 | 0.0169 | 1.4143 | up   | Rps6ka2   | NM_057128        |
| A_44_P1613<br>32 | 0.0472 | 1.7507 | up   |           | XM_573515        |
| A_44_P3091<br>60 | 0.0167 | 1.3024 | down | Npl       | NM_0010139<br>84 |
| A_44_P2349<br>47 | 0.0118 | 1.3435 | down |           | AA925064         |

|                   |        |        |      |                |                  |
|-------------------|--------|--------|------|----------------|------------------|
| A_44_P3346<br>92  | 0.0426 | 1.3842 | up   |                | AI549079         |
| A_44_P8039<br>58  | 0.0013 | 1.2432 | up   |                | DV717280         |
| A_44_P4505<br>18  | 0.0455 | 1.2005 | down | Rangrf         | NM_0011057<br>90 |
| A_44_P3216<br>22  | 0.0394 | 1.4841 | down | Itfg3          | NM_0010097<br>01 |
| A_44_P3062<br>73  | 0.0090 | 1.2788 | up   |                | AI105154         |
| A_44_P4479<br>07  | 0.0145 | 1.4624 | down | Cgn            | XM_227472        |
| A_44_P2766<br>98  | 0.0462 | 1.1203 | down | RGD131126<br>5 | NM_0010141<br>73 |
| A_43_P1671<br>8   | 0.0350 | 1.2533 | down | Cdc23          | NM_0011006<br>59 |
| A_44_P4712<br>70  | 0.0050 | 1.7866 | up   |                | XM_232762        |
| A_44_P5551<br>07  | 0.0464 | 1.3227 | up   | Pcbd1          | M83740           |
| A_44_P2618<br>96  | 0.0418 | 1.3276 | up   |                | BM383777         |
| A_44_P2954<br>08  | 0.0445 | 1.6636 | down |                | XM_0010759<br>37 |
| A_44_P3438<br>88  | 0.0144 | 1.3255 | up   |                | BU759225         |
| A_44_P2950<br>08  | 0.0468 | 1.3629 | up   |                |                  |
| A_44_P9764<br>21  | 0.0086 | 1.4605 | down |                |                  |
| A_44_P1034<br>375 | 0.0315 | 1.1621 | up   | Ptgfrn         | NM_019243        |
| A_44_P5581<br>33  | 0.0090 | 1.4036 | down |                | XM_343295        |
| A_44_P4796<br>64  | 0.0076 | 1.2625 | up   |                | AI011156         |
| A_44_P9586<br>50  | 0.0470 | 1.1762 | up   | Isyl           | NM_0010141<br>88 |
| A_44_P6046<br>35  | 0.0182 | 1.1636 | up   |                | AW144037         |
| A_44_P3410<br>54  | 0.0306 | 1.5232 | up   |                | AA891725         |
| A_42_P6044<br>25  | 0.0297 | 1.1798 | down | Hebp1          | BC168221         |

|                  |        |        |      |         |                  |
|------------------|--------|--------|------|---------|------------------|
| A_44_P9769<br>18 | 0.0407 | 4.6704 | down |         |                  |
| A_44_P8071<br>46 | 0.0329 | 1.1709 | up   |         |                  |
| A_44_P6650<br>65 | 0.0184 | 1.5791 | up   |         | AW918432         |
| A_44_P9311<br>86 | 0.0057 | 1.3398 | up   |         | XR_009414        |
| A_44_P3126<br>06 | 0.0286 | 1.5119 | up   |         | BG153336         |
| A_44_P4034<br>57 | 0.0205 | 1.0755 | up   | Fam119a | XM_237209        |
| A_44_P8841<br>88 | 0.0096 | 1.1756 | up   |         |                  |
| A_44_P3079<br>07 | 0.0052 | 1.4387 | up   |         | AI177510         |
| A_43_P1963<br>4  | 0.0149 | 1.5236 | down | Chst1   | NM_0010119<br>55 |
| A_44_P2285<br>99 | 0.0290 | 1.1637 | up   | Sec22b  | NM_0010256<br>86 |
| A_42_P8375<br>68 | 0.0323 | 1.1920 | down | L1cam   | NM_017345        |
| A_44_P1185<br>31 | 0.0186 | 1.3878 | down |         | AW919008         |
| A_44_P7314<br>87 | 0.0229 | 1.2620 | down | Fbxo44  | XM_575958        |
| A_43_P1104<br>0  | 0.0416 | 1.1832 | down | Tppp3   | NM_0010096<br>39 |
| A_43_P1173<br>4  | 0.0242 | 1.3674 | up   | Gnai1   | NM_013145        |
| A_44_P1348<br>25 | 0.0100 | 1.2304 | up   | Tbce    | NM_0010121<br>61 |
| A_44_P4220<br>06 | 0.0179 | 1.1864 | up   |         | XM_344715        |
| A_44_P2696<br>52 | 0.0448 | 1.2229 | up   |         |                  |
| A_44_P9662<br>20 | 0.0189 | 1.3275 | down |         |                  |
| A_44_P2605<br>42 | 0.0117 | 1.6300 | up   |         | XM_346356        |
| A_43_P1040<br>5  | 0.0040 | 1.4141 | up   | Klhdc5  | NM_0011092<br>57 |
| A_43_P1954<br>5  | 0.0308 | 1.3675 | down | Meis3   | NM_0011084<br>72 |

|                   |        |        |      |                |                  |
|-------------------|--------|--------|------|----------------|------------------|
| A_44_P3045<br>60  | 0.0063 | 1.3134 | up   | RGD156509<br>3 | XM_342164        |
| A_44_P1028<br>765 | 0.0164 | 1.1864 | down | R3hdm2         | NM_0011305<br>57 |
| A_44_P4620<br>58  | 0.0413 | 1.1202 | up   | RGD156254<br>7 | XM_0010803<br>93 |
| A_44_P9449<br>35  | 0.0455 | 1.4032 | up   |                |                  |
| A_44_P7472<br>51  | 0.0055 | 1.3198 | up   |                |                  |
| A_44_P9334<br>59  | 0.0126 | 1.1337 | down | RGD130887<br>4 | NM_0010340<br>03 |
| A_44_P1864<br>54  | 0.0031 | 1.9988 | up   | Hivep1         | NM_0011057<br>51 |
| A_44_P1482<br>52  | 0.0477 | 2.5493 | up   |                | AI231547         |
| A_43_P1660<br>9   | 0.0028 | 1.1876 | down | Mkrm1          | NM_0010042<br>33 |
| A_44_P3562<br>42  | 0.0008 | 1.0922 | down | Zcchc8         | NM_0011059<br>29 |
| A_44_P1402<br>14  | 0.0047 | 1.3831 | up   | RGD156006<br>9 | XM_0010756<br>37 |
| A_44_P2908<br>67  | 0.0452 | 1.1643 | up   |                |                  |
| A_44_P3533<br>54  | 0.0103 | 1.5023 | up   |                | AW533421         |
| A_43_P1845<br>5   | 0.0243 | 1.2164 | up   | Med1           | NM_0011343<br>61 |
| A_44_P4385<br>29  | 0.0064 | 1.4314 | up   |                |                  |
| A_44_P4019<br>39  | 0.0363 | 1.1729 | down |                | XM_0010613<br>91 |
| A_44_P1395<br>00  | 0.0306 | 1.6857 | down |                | AI233983         |
| A_44_P1003<br>794 | 0.0083 | 1.3878 | up   | Nr3c1          | NM_012576        |
| A_44_P1517<br>08  | 0.0414 | 1.9263 | up   |                | S82585           |
| A_44_P4505<br>16  | 0.0093 | 1.4431 | up   |                | XM_237116        |
| A_44_P6176<br>30  | 0.0380 | 2.3822 | up   |                | AW914552         |
| A_44_P8237<br>11  | 0.0453 | 1.3291 | down | LOC685326      | XM_0010633<br>53 |

|                   |        |        |      |                  |                  |
|-------------------|--------|--------|------|------------------|------------------|
| A_44_P6024<br>19  | 0.0322 | 1.5669 | up   |                  | BE110143         |
| A_44_P8256<br>44  | 0.0117 | 1.2801 | down |                  |                  |
| A_42_P7744<br>39  | 0.0292 | 1.1671 | up   |                  | BG663067         |
| A_44_P4937<br>68  | 0.0191 | 1.6057 | up   |                  | CA509937         |
| A_44_P1047<br>364 | 0.0040 | 1.6757 | up   | RGD156626<br>5   | NM_0011345<br>89 |
| A_44_P3541<br>18  | 0.0392 | 1.2116 | down | Chmp1b           | NM_0011095<br>33 |
| A_43_P1094<br>8   | 0.0153 | 1.3590 | down |                  | BM388975         |
| A_44_P8986<br>58  | 0.0091 | 1.4320 | up   |                  |                  |
| A_44_P5920<br>86  | 0.0491 | 1.2131 | down |                  |                  |
| A_43_P1315<br>5   | 0.0288 | 1.2250 | down | Slc6a20          | NM_133296        |
| A_44_P3966<br>79  | 0.0005 | 1.2593 | up   |                  | FM117181         |
| A_44_P4432<br>71  | 0.0075 | 1.3133 | down | Rbpjl            | NM_0011086<br>04 |
| A_44_P2567<br>74  | 0.0191 | 1.2456 | up   |                  | CA506767         |
| A_44_P4761<br>80  | 0.0107 | 1.5555 | up   |                  |                  |
| A_43_P2060<br>2   | 0.0451 | 1.1305 | down |                  | BC158782         |
| A_44_P5437<br>11  | 0.0221 | 1.1584 | up   | RGD156356<br>4   | XM_0027285<br>05 |
| A_44_P2238<br>40  | 0.0184 | 1.4140 | up   |                  | AA859845         |
| A_44_P4358<br>67  | 0.0038 | 1.5884 | up   | Atp5hl1          | XM_0010575<br>86 |
| A_44_P3794<br>61  | 0.0005 | 2.2861 | up   | Dhx16            | NM_212496        |
| A_44_P1426<br>70  | 0.0018 | 1.8296 | up   | LOC100364<br>757 | XM_0027275<br>84 |
| A_44_P4314<br>88  | 0.0122 | 1.2209 | up   | RGD156296<br>2   | XM_235716        |
| A_44_P6213<br>78  | 0.0402 | 1.2288 | up   |                  |                  |

|                   |        |        |      |          |                  |
|-------------------|--------|--------|------|----------|------------------|
| A_44_P5504<br>54  | 0.0314 | 1.4569 | down |          | XM_0010789<br>04 |
| A_42_P6588<br>15  | 0.0169 | 1.2193 | up   | Atp6v1e1 | NM_198745        |
| A_42_P5615<br>80  | 0.0118 | 1.1031 | up   | Rps27a   | NM_031113        |
| A_44_P9796<br>59  | 0.0131 | 1.2739 | up   |          |                  |
| A_44_P4172<br>39  | 0.0252 | 1.6144 | down |          |                  |
| A_44_P5011<br>62  | 0.0191 | 2.2374 | up   |          | L17080           |
| A_44_P1026<br>984 | 0.0204 | 2.0756 | down | Asb12    | NM_0010373<br>67 |
| A_44_P2789<br>23  | 0.0335 | 1.2315 | down | Oxnad1   | NM_0011072<br>95 |
| A_44_P1402<br>33  | 0.0003 | 1.7115 | up   |          |                  |
| A_44_P1721<br>87  | 0.0071 | 1.2662 | up   |          | BI303604         |
| A_44_P3935<br>21  | 0.0191 | 1.3161 | down | Col23a1  | NM_181636        |
| A_44_P1310<br>84  | 0.0444 | 1.2563 | up   | Rbmx2    | NM_0011137<br>86 |
| A_44_P6677<br>48  | 0.0451 | 1.6695 | up   |          |                  |
| A_44_P7113<br>21  | 0.0468 | 1.3473 | up   |          | AI406667         |
| A_44_P2800<br>26  | 0.0120 | 1.6357 | up   |          | BE349669         |
| A_44_P3938<br>35  | 0.0149 | 1.1606 | up   |          | XM_227733        |
| A_44_P9743<br>13  | 0.0024 | 1.4285 | up   |          | XM_577103        |
| A_44_P2140<br>94  | 0.0227 | 1.2435 | up   |          | AA924354         |
| A_43_P1000<br>6   | 0.0089 | 1.1267 | up   | Map2k3   | NM_0011006<br>74 |
| A_44_P5743<br>68  | 0.0044 | 1.4239 | up   |          | AA963828         |
| A_44_P5061<br>24  | 0.0307 | 1.3202 | up   |          | XM_222590        |
| A_44_P3578<br>35  | 0.0429 | 1.4186 | up   |          | BF282088         |

|                   |        |        |      |           |                  |
|-------------------|--------|--------|------|-----------|------------------|
| A_44_P2793<br>31  | 0.0190 | 1.4687 | down |           | XM_343561        |
| A_44_P8883<br>03  | 0.0442 | 1.1553 | up   | LOC685031 | XM_0010620<br>12 |
| A_44_P8370<br>70  | 0.0066 | 1.3731 | up   |           |                  |
| A_44_P2599<br>31  | 0.0121 | 1.3352 | down | Arsb      | NM_033443        |
| A_44_P5624<br>19  | 0.0222 | 1.2700 | up   |           |                  |
| A_44_P4232<br>63  | 0.0241 | 1.4539 | up   |           | AI234620         |
| A_44_P1037<br>275 | 0.0303 | 1.4036 | up   | Vkorc111  | NM_203338        |
| A_44_P6833<br>92  | 0.0411 | 1.2285 | up   |           |                  |
| A_44_P5626<br>44  | 0.0015 | 1.8545 | up   |           | BE113195         |
| A_44_P4656<br>84  | 0.0446 | 1.4327 | up   |           | BE120816         |
| A_44_P3919<br>15  | 0.0012 | 1.7286 | up   |           |                  |
| A_44_P7458<br>27  | 0.0151 | 1.1813 | down |           |                  |
| A_44_P4781<br>44  | 0.0320 | 1.8054 | up   | LOC290595 | NM_0011060<br>63 |
| A_44_P3906<br>69  | 0.0350 | 1.1728 | down |           | AW921499         |
| A_44_P3486<br>62  | 0.0478 | 1.2848 | up   |           | AI237711         |
| A_44_P3471<br>05  | 0.0235 | 1.1247 | up   |           | XM_345436        |
| A_44_P4142<br>73  | 0.0431 | 2.4583 | down | Cox8b     | NM_012786        |
| A_44_P3625<br>15  | 0.0169 | 1.5182 | down |           | BF283269         |
| A_43_P1522<br>0   | 0.0233 | 1.1648 | down | Celsr2    | AB011529         |
| A_44_P1025<br>454 | 0.0332 | 1.1119 | up   | Foxp1     | NM_0010341<br>31 |
| A_44_P7411<br>99  | 0.0034 | 1.3447 | up   |           | AW534447         |
| A_44_P1637<br>83  | 0.0038 | 1.6702 | up   |           |                  |



|                  |        |        |      |                  |                  |
|------------------|--------|--------|------|------------------|------------------|
| A_42_P5337<br>92 | 0.0492 | 1.1179 | down | Srpk2            | NM_0011065<br>75 |
| A_44_P9476<br>70 | 0.0109 | 1.1525 | up   |                  |                  |
| A_43_P1047<br>0  | 0.0184 | 1.2064 | up   | Ext1             | NM_0011305<br>40 |
| A_44_P1157<br>98 | 0.0424 | 1.2024 | up   |                  | BI277793         |
| A_42_P7265<br>73 | 0.0092 | 1.2538 | down | Npr2             | NM_053838        |
| A_44_P3470<br>23 | 0.0078 | 2.3736 | up   |                  | XM_227709        |
| A_44_P1135<br>88 | 0.0351 | 1.2182 | up   |                  | AA893307         |
| A_44_P4020<br>91 | 0.0112 | 1.3077 | up   |                  | AI059903         |
| A_44_P8204<br>21 | 0.0445 | 1.3169 | up   |                  | BF522212         |
| A_44_P9301<br>60 | 0.0168 | 1.1551 | up   | Pdcd6ip          | NM_0010299<br>10 |
| A_44_P5544<br>15 | 0.0303 | 1.1652 | down |                  | BI281796         |
| A_44_P3697<br>60 | 0.0498 | 1.1869 | down | Igbp1            | NM_031624        |
| A_44_P2147<br>97 | 0.0133 | 1.2734 | up   |                  | BQ206248         |
| A_44_P8525<br>73 | 0.0137 | 1.1758 | up   |                  |                  |
| A_44_P7070<br>95 | 0.0079 | 1.3200 | up   |                  | BF564078         |
| A_44_P8083<br>10 | 0.0304 | 1.4336 | down | Asb3             | NM_0011088<br>64 |
| A_44_P9808<br>30 | 0.0184 | 1.6578 | up   |                  |                  |
| A_44_P6064<br>64 | 0.0003 | 2.0015 | up   |                  | EV763276         |
| A_44_P3214<br>88 | 0.0192 | 1.1761 | down | LOC100294<br>508 | NM_0011596<br>55 |
| A_44_P1424<br>54 | 0.0005 | 1.8606 | up   |                  | XM_0010692<br>57 |
| A_43_P1837<br>0  | 0.0209 | 1.1831 | down |                  |                  |
| A_44_P5054<br>62 | 0.0156 | 1.3149 | up   |                  | AI711598         |

|                  |        |        |      |                  |                  |
|------------------|--------|--------|------|------------------|------------------|
| A_44_P2907<br>03 | 0.0244 | 1.2504 | down | LOC100363<br>748 | XR_085745        |
| A_44_P2386<br>42 | 0.0155 | 1.1966 | up   | Tbpl1            | NM_0011272<br>01 |
| A_44_P9912<br>39 | 0.0132 | 1.1806 | up   | Sh3glb1          | NM_0010119<br>29 |
| A_44_P5187<br>64 | 0.0326 | 1.6730 | down | LOC363060        | NM_0010142<br>09 |
| A_44_P2163<br>95 | 0.0181 | 1.2964 | down | Gadd45a          | NM_024127        |
| A_44_P2751<br>89 | 0.0217 | 1.2466 | up   |                  | XM_0010604<br>19 |
| A_44_P5565<br>28 | 0.0390 | 1.3717 | down | Emilin1          | NM_0011067<br>10 |
| A_44_P9142<br>61 | 0.0374 | 1.1289 | up   |                  |                  |
| A_43_P1669<br>6  | 0.0152 | 1.2375 | down | Rnf19a           | NM_0011305<br>60 |
| A_43_P1022<br>7  | 0.0229 | 1.1324 | up   | Abi1             | NM_024397        |
| A_44_P3114<br>55 | 0.0258 | 1.2199 | down | Nrg2             | NM_0011361<br>51 |
| A_44_P3707<br>15 | 0.0226 | 1.6700 | down |                  |                  |
| A_44_P3241<br>40 | 0.0220 | 1.4302 | up   |                  | XM_0010604<br>56 |
| A_44_P4450<br>90 | 0.0096 | 1.1808 | down | Gaa              | NM_199118        |
| A_44_P8834<br>45 | 0.0428 | 2.6671 | up   |                  |                  |
| A_43_P1024<br>8  | 0.0273 | 1.1087 | down | Ublcp1           | NM_0010141<br>17 |
| A_44_P1941<br>67 | 0.0499 | 8.1612 | up   | RT1-Ba           | X14879           |
| A_44_P1324<br>11 | 0.0226 | 1.1086 | up   | RGD131023<br>0   | NM_0010390<br>15 |
| A_44_P6522<br>13 | 0.0087 | 1.4278 | up   |                  |                  |
| A_44_P2556<br>52 | 0.0392 | 1.1931 | down | Akap9            | NM_0010370<br>93 |
| A_44_P3604<br>86 | 0.0104 | 1.4614 | down | Cyp4b1           | NM_016999        |
| A_44_P3664<br>29 | 0.0190 | 1.2408 | up   |                  | AA955240         |

|                   |        |        |      |        |                  |
|-------------------|--------|--------|------|--------|------------------|
| A_44_P8369<br>50  | 0.0102 | 1.1150 | up   |        |                  |
| A_44_P2951<br>25  | 0.0203 | 1.3060 | up   |        |                  |
| A_44_P3677<br>26  | 0.0035 | 1.2451 | down | Isca1  | NM_181626        |
| A_44_P7601<br>60  | 0.0308 | 1.6147 | up   |        |                  |
| A_44_P1015<br>606 | 0.0494 | 1.2053 | up   | Sfrs8  | NM_0010349<br>24 |
| A_43_P1458<br>1   | 0.0160 | 1.2462 | up   | Cbll1  | NM_0011080<br>18 |
| A_44_P3008<br>18  | 0.0469 | 1.1445 | up   |        | AF030087         |
| A_44_P1060<br>234 | 0.0439 | 1.1828 | down | Pdcl3  | NM_0010257<br>09 |
| A_43_P1818<br>6   | 0.0214 | 1.1257 | down |        | XM_232226        |
| A_44_P6674<br>69  | 0.0212 | 1.2465 | up   |        |                  |
| A_44_P6389<br>52  | 0.0288 | 1.4373 | down |        |                  |
| A_44_P2364<br>07  | 0.0076 | 1.5242 | down | Lnx1   | NM_0011083<br>58 |
| A_44_P5232<br>08  | 0.0309 | 1.6209 | down |        | XM_217114        |
| A_43_P1907<br>2   | 0.0096 | 1.3682 | down | Fam83h | NM_0011305<br>65 |
| A_44_P9278<br>40  | 0.0035 | 1.2452 | down | Agpat3 | NM_0011063<br>78 |
| A_44_P4792<br>39  | 0.0309 | 1.4164 | up   |        | BE117476         |
| A_44_P4939<br>24  | 0.0428 | 1.2730 | down | Man2b1 | NM_199404        |
| A_44_P7603<br>60  | 0.0326 | 1.5979 | up   |        |                  |
| A_44_P2443<br>88  | 0.0018 | 1.2925 | up   |        | AABR030579<br>77 |
| A_44_P4561<br>91  | 0.0102 | 1.3289 | up   |        | DV714691         |
| A_44_P9668<br>88  | 0.0002 | 3.7755 | up   |        |                  |
| A_44_P4956<br>11  | 0.0022 | 1.2154 | up   | Wdfy3  | NM_0011705<br>51 |

|                  |        |        |      |         |                  |
|------------------|--------|--------|------|---------|------------------|
| A_44_P5269<br>33 | 0.0268 | 1.2899 | down | Ctnnb1  | NM_053357        |
| A_44_P6557<br>53 | 0.0262 | 1.7367 | up   |         |                  |
| A_44_P3735<br>16 | 0.0173 | 1.2786 | up   | Pitpnc1 | XM_573213        |
| A_44_P8686<br>11 | 0.0200 | 1.2666 | down |         |                  |
| A_44_P5392<br>31 | 0.0134 | 1.4111 | up   |         |                  |
| A_44_P3885<br>72 | 0.0227 | 1.1551 | down | Ubxn1   | NM_0010348<br>29 |
| A_44_P7363<br>97 | 0.0230 | 1.1544 | down |         |                  |
| A_44_P1161<br>87 | 0.0211 | 1.3615 | up   |         | BG669136         |
| A_44_P4967<br>06 | 0.0478 | 1.2464 | down | Ikbke   | NM_0011088<br>54 |
| A_44_P3588<br>07 | 0.0036 | 1.3994 | down | Surf6   | NM_0010150<br>14 |
| A_44_P2268<br>58 | 0.0496 | 1.3845 | down | Mrfap1  | NM_0010092<br>64 |
| A_44_P2534<br>68 | 0.0412 | 1.3419 | up   |         | XM_343922        |
| A_44_P1565<br>89 | 0.0316 | 1.2871 | down | Ngef    | NM_0011362<br>41 |
| A_44_P2486<br>34 | 0.0355 | 1.2778 | down | Selo    | NM_0010854<br>85 |
| A_44_P2747<br>56 | 0.0316 | 1.4835 | down | Cdcp1   | NM_0011068<br>69 |
| A_44_P1147<br>20 | 0.0475 | 1.4312 | down | Adprhl2 | NM_0011086<br>80 |
| A_43_P1091<br>9  | 0.0100 | 1.1765 | up   | Exosc8  | NM_0011064<br>32 |
| A_44_P4875<br>62 | 0.0392 | 1.3347 | down | Net1    | NM_0010390<br>23 |
| A_44_P2052<br>89 | 0.0439 | 1.7158 | up   |         | AA858990         |
| A_44_P3981<br>67 | 0.0420 | 1.2628 | down | Prdx1   | NM_057114        |
| A_44_P4126<br>72 | 0.0336 | 1.1545 | down | Rufy2   | NM_0011685<br>86 |
| A_44_P4347<br>66 | 0.0281 | 1.1384 | up   |         | BX883047         |

|                   |        |        |      |                  |                  |
|-------------------|--------|--------|------|------------------|------------------|
| A_44_P6989<br>89  | 0.0123 | 1.7670 | up   |                  |                  |
| A_44_P5435<br>76  | 0.0420 | 1.3370 | up   |                  |                  |
| A_43_P2171<br>9   | 0.0451 | 1.3152 | down | Mpzl2            | NM_0011068<br>18 |
| A_44_P2781<br>40  | 0.0383 | 1.1303 | down |                  | AW143234         |
| A_44_P3775<br>93  | 0.0012 | 1.6926 | up   | LOC100361<br>838 | XM_0027253<br>90 |
| A_44_P7265<br>01  | 0.0271 | 1.3589 | down |                  | AW919920         |
| A_44_P1553<br>21  | 0.0416 | 2.7468 | up   |                  | M67496           |
| A_44_P1122<br>37  | 0.0066 | 1.3690 | up   |                  |                  |
| A_44_P8026<br>72  | 0.0441 | 3.0718 | up   |                  | AW914691         |
| A_44_P4326<br>31  | 0.0341 | 1.1331 | up   |                  | BF388440         |
| A_44_P1000<br>383 | 0.0003 | 1.5072 | up   | Eprs             | BC088324         |
| A_44_P6993<br>98  | 0.0098 | 1.1588 | down | Zfp445           | XM_236726        |
| A_44_P3830<br>88  | 0.0067 | 2.0606 | down |                  | AF366899         |
| A_42_P8139<br>75  | 0.0303 | 1.0951 | up   | Kdm3a            | NM_175764        |
| A_44_P7611<br>79  | 0.0232 | 1.1522 | up   |                  |                  |
| A_44_P5256<br>81  | 0.0150 | 1.6176 | up   | RGD156618<br>6   | XM_0010701<br>55 |
| A_44_P5074<br>19  | 0.0119 | 1.2062 | up   | Trak2            | NM_133560        |
| A_44_P4734<br>49  | 0.0041 | 1.4301 | up   |                  | XM_227913        |
| A_44_P1712<br>61  | 0.0439 | 1.8372 | down | Sh2d7            | XM_0010724<br>62 |
| A_44_P4333<br>83  | 0.0131 | 1.3409 | up   |                  | S58644           |
| A_44_P1628<br>92  | 0.0478 | 1.7254 | up   |                  | U68562           |
| A_44_P4690<br>57  | 0.0002 | 1.5175 | up   | RGD156152<br>7   | XM_236973        |

|                   |        |        |      |                |                  |
|-------------------|--------|--------|------|----------------|------------------|
| A_44_P9744<br>25  | 0.0150 | 1.6526 | up   |                |                  |
| A_44_P4620<br>10  | 0.0002 | 1.1969 | down | Zbtb17         | NM_0010121<br>05 |
| A_44_P1022<br>978 | 0.0067 | 1.5870 | up   |                | AA801048         |
| A_44_P3380<br>59  | 0.0312 | 1.4437 | down | RGD131118<br>8 | NM_0011358<br>97 |
| A_43_P1716<br>4   | 0.0264 | 1.3581 | up   | Pcaf           | XM_217321        |
| A_43_P1205<br>9   | 0.0378 | 1.2807 | down | Rnase4         | NM_020082        |
| A_42_P5260<br>30  | 0.0087 | 1.2553 | down | Decr1          | NM_057197        |
| A_44_P3103<br>36  | 0.0004 | 1.5061 | up   |                | AW521171         |
| A_44_P5917<br>29  | 0.0455 | 1.3030 | down | Gnal           | XM_341626        |
| A_44_P5451<br>14  | 0.0321 | 1.3214 | up   |                | AA899814         |
| A_44_P7618<br>86  | 0.0295 | 1.1287 | up   | Zswim1         | XM_230846        |
| A_44_P3859<br>88  | 0.0105 | 1.1196 | down | Ahcy11         | NM_0011085<br>61 |
| A_44_P6529<br>41  | 0.0243 | 1.3138 | down |                |                  |
| A_44_P8227<br>89  | 0.0435 | 1.0964 | up   |                |                  |
| A_44_P4115<br>05  | 0.0109 | 1.3893 | up   | Ccnd1          | NM_171992        |
| A_44_P2027<br>26  | 0.0255 | 1.2770 | down |                | BF406960         |
| A_44_P2676<br>10  | 0.0040 | 1.4158 | up   | Trib2          | NM_0011080<br>15 |
| A_44_P9146<br>32  | 0.0108 | 1.4266 | up   |                |                  |
| A_44_P4265<br>24  | 0.0333 | 1.4842 | down | Creg1          | NM_0011059<br>66 |
| A_44_P2559<br>05  | 0.0063 | 1.4903 | down | Tnk1           | NM_0011070<br>12 |
| A_44_P3599<br>39  | 0.0344 | 1.2754 | up   |                | AA859649         |
| A_44_P2298<br>87  | 0.0125 | 1.7340 | down | Acbd4          | NM_0010120<br>13 |

|               |        |        |      |           |              |
|---------------|--------|--------|------|-----------|--------------|
| A_43_P21280   | 0.0461 | 1.2565 | down | Agap1     | NM_001108230 |
| A_44_P574914  | 0.0129 | 1.4684 | down |           | EV773002     |
| A_44_P358782  | 0.0276 | 1.4270 | down | Wdr47     | NM_001100702 |
| A_44_P548790  | 0.0089 | 1.4347 | up   | LOC299915 | XM_235301    |
| A_44_P200624  | 0.0041 | 1.5344 | up   |           | AA998294     |
| A_44_P1011253 | 0.0305 | 1.1419 | up   | Nars      | NM_001025635 |
| A_44_P170524  | 0.0132 | 1.4039 | down | Tpcn1     | NM_139332    |
| A_44_P235591  | 0.0446 | 1.3277 | up   |           | CA504421     |
| A_44_P247139  | 0.0096 | 1.1117 | up   | MGC112830 | NM_001025718 |
| A_44_P683608  | 0.0125 | 1.2818 | up   |           | CK599356     |
| A_44_P1049252 | 0.0159 | 1.2106 | down | Naprt1    | NM_207609    |
| A_44_P515048  | 0.0293 | 1.2123 | up   |           | AW140632     |
| A_44_P560458  | 0.0400 | 1.1537 | down |           | XM_001062165 |
| A_44_P623479  | 0.0383 | 1.4914 | up   |           |              |
| A_44_P242206  | 0.0182 | 1.2036 | up   |           | AW918133     |
| A_43_P23188   | 0.0079 | 1.2917 | down |           | BC107473     |
| A_44_P314169  | 0.0335 | 1.2344 | down |           | DY561793     |
| A_44_P125409  | 0.0159 | 1.0821 | up   |           | XM_216889    |
| A_44_P181783  | 0.0225 | 1.6029 | up   |           | BE118901     |
| A_44_P526046  | 0.0356 | 1.3898 | up   |           | BQ196010     |
| A_44_P318444  | 0.0001 | 1.7915 | down | Bco2      | NM_001127712 |
| A_44_P322677  | 0.0062 | 1.7871 | up   |           | AW434781     |

|                  |        |        |      |                |                  |
|------------------|--------|--------|------|----------------|------------------|
| A_43_P2182<br>1  | 0.0499 | 1.2842 | down |                | CB547114         |
| A_44_P8368<br>06 | 0.0176 | 1.5190 | up   |                | XR_006817        |
| A_43_P1710<br>8  | 0.0318 | 1.1591 | up   | Srrm1          | NM_0011079<br>86 |
| A_44_P3236<br>64 | 0.0440 | 1.0839 | up   | RGD155968<br>2 | XM_341363        |
| A_42_P8332<br>12 | 0.0089 | 1.1218 | up   | Eif4h          | NM_0010069<br>57 |
| A_43_P1695<br>4  | 0.0497 | 1.2301 | down | LOC686323      | NM_0011275<br>70 |
| A_44_P3779<br>10 | 0.0244 | 1.2462 | down | Iqcb1          | NM_0011070<br>92 |
| A_44_P1216<br>82 | 0.0024 | 1.4758 | up   |                | XM_230870        |
| A_44_P8084<br>72 | 0.0238 | 1.3397 | up   |                |                  |
| A_44_P4406<br>63 | 0.0006 | 1.2196 | down | Prdm9          | NM_0011089<br>03 |
| A_44_P8832<br>54 | 0.0160 | 1.1306 | up   |                | XM_0010604<br>99 |
| A_44_P3331<br>09 | 0.0474 | 1.2917 | down | Pcdhb20        | NM_0011093<br>95 |
| A_44_P1113<br>68 | 0.0318 | 1.2332 | up   | Pak1ip1        | NM_0010373<br>56 |
| A_44_P1748<br>81 | 0.0010 | 2.6210 | up   |                | AI577346         |
| A_44_P3850<br>30 | 0.0491 | 1.2641 | up   |                | AI170067         |
| A_44_P5102<br>06 | 0.0069 | 1.4448 | up   |                | BE119829         |
| A_44_P3836<br>76 | 0.0417 | 1.2690 | down |                | AA964750         |
| A_44_P5601<br>95 | 0.0293 | 1.2260 | up   |                |                  |
| A_44_P4901<br>88 | 0.0175 | 1.3462 | down |                | XR_085884        |
| A_44_P5291<br>14 | 0.0049 | 1.4493 | up   |                | AA818669         |
| A_43_P1429<br>0  | 0.0476 | 1.1361 | down | Slc35a5        | XM_573283        |
| A_44_P2169<br>20 | 0.0373 | 1.6014 | up   |                | AA924413         |



|                  |        |        |      |         |                  |
|------------------|--------|--------|------|---------|------------------|
| A_44_P9413<br>42 | 0.0438 | 1.2860 | up   | Reep5   | NM_0011088<br>88 |
| A_44_P7296<br>21 | 0.0200 | 1.2437 | up   | Maml1   | NM_0011069<br>97 |
| A_44_P8215<br>28 | 0.0085 | 1.7548 | up   |         |                  |
| A_44_P2899<br>51 | 0.0142 | 1.2410 | up   |         | AW914233         |
| A_44_P4501<br>40 | 0.0289 | 1.2839 | up   |         | XM_224783        |
| A_44_P1499<br>25 | 0.0140 | 1.5997 | down |         | XM_0027265<br>85 |
| A_44_P4024<br>25 | 0.0442 | 1.1164 | up   | Bwk1    | NM_198743        |
| A_44_P1937<br>36 | 0.0196 | 1.4050 | up   |         | AI011505         |
| A_43_P1192<br>6  | 0.0218 | 1.1088 | down |         | J02752           |
| A_44_P8217<br>92 | 0.0122 | 1.2275 | down |         |                  |
| A_44_P8656<br>20 | 0.0411 | 1.3273 | down |         | AW914057         |
| A_44_P1949<br>09 | 0.0206 | 1.3292 | down | Ripk4   | NM_0011071<br>03 |
| A_43_P1234<br>6  | 0.0203 | 1.4590 | down | Mertk   | NM_022943        |
| A_43_P1146<br>2  | 0.0157 | 1.2621 | up   | Ets1    | L20681           |
| A_44_P3062<br>38 | 0.0054 | 1.6260 | up   |         | BF287427         |
| A_42_P8176<br>68 | 0.0080 | 1.2098 | down |         | BC086427         |
| A_44_P7626<br>70 | 0.0122 | 1.3547 | down |         | FM074540         |
| A_44_P2408<br>28 | 0.0372 | 1.1063 | down | Giyd2   | NM_0010092<br>92 |
| A_44_P3872<br>90 | 0.0317 | 1.2462 | down | Twf1    | NM_0010085<br>21 |
| A_44_P5741<br>34 | 0.0153 | 1.2116 | down | Slc35f5 | NM_0011059<br>50 |
| A_44_P1042<br>50 | 0.0433 | 1.2166 | up   | Mrps14  | NM_0011059<br>63 |
| A_42_P5099<br>67 | 0.0317 | 1.8271 | down | Slc7a9  | NM_053929        |

|                   |        |        |      |          |                  |
|-------------------|--------|--------|------|----------|------------------|
| A_44_P9185<br>16  | 0.0467 | 1.3641 | up   |          |                  |
| A_43_P1350<br>9   | 0.0070 | 1.5156 | down | Slc39a13 | NM_0010391<br>96 |
| A_44_P4875<br>94  | 0.0006 | 1.3056 | down |          | XM_0027262<br>33 |
| A_44_P1071<br>355 | 0.0355 | 1.1493 | down | Usp10    | NM_0010341<br>46 |
| A_44_P2275<br>71  | 0.0307 | 1.4411 | down |          |                  |
| A_44_P2774<br>23  | 0.0396 | 1.3472 | up   |          | AI177752         |
| A_44_P9023<br>75  | 0.0160 | 1.4613 | up   |          |                  |
| A_44_P5685<br>60  | 0.0097 | 1.3058 | up   |          | CD371170         |
| A_43_P2043<br>0   | 0.0203 | 1.3683 | down | Lats2    | NM_0011072<br>67 |
| A_44_P1522<br>05  | 0.0196 | 1.6489 | down |          | XM_575674        |
| A_44_P1605<br>45  | 0.0207 | 1.1880 | up   |          | DV725496         |
| A_44_P2004<br>31  | 0.0062 | 1.6641 | up   |          | AA965274         |
| A_44_P7285<br>24  | 0.0468 | 1.2404 | down |          |                  |
| A_42_P6488<br>00  | 0.0296 | 1.3891 | down |          | AA998304         |
| A_44_P7707<br>24  | 0.0018 | 1.2352 | up   |          |                  |
| A_44_P4700<br>43  | 0.0298 | 1.2288 | up   | Brd1     | NM_0011081<br>03 |
| A_44_P1750<br>78  | 0.0242 | 1.2565 | down | Col27a1  | NM_198747        |
| A_44_P4616<br>57  | 0.0214 | 1.2402 | up   |          | XM_219533        |
| A_43_P1305<br>4   | 0.0320 | 1.1682 | down | Hadh     | NM_057186        |
| A_44_P9252<br>39  | 0.0453 | 1.2344 | up   |          | AA998060         |
| A_44_P1050<br>333 | 0.0301 | 1.2305 | up   |          | XR_009210        |
| A_44_P4956<br>48  | 0.0388 | 1.2990 | down | Sec24b   | NM_0011064<br>74 |

|                   |        |        |      |         |                  |
|-------------------|--------|--------|------|---------|------------------|
| A_44_P8966<br>98  | 0.0029 | 1.1666 | down |         | AW914836         |
| A_44_P2090<br>58  | 0.0240 | 1.1769 | up   | Satb1   | NM_0010121<br>29 |
| A_44_P1817<br>18  | 0.0421 | 1.4224 | down |         | BI285476         |
| A_44_P1019<br>772 | 0.0468 | 1.1656 | up   |         | BF523849         |
| A_44_P5034<br>71  | 0.0161 | 1.7885 | down | Itga7   | NM_030842        |
| A_44_P8532<br>68  | 0.0480 | 1.1888 | down |         | EV777007         |
| A_44_P1133<br>60  | 0.0012 | 1.4313 | up   |         | AI102738         |
| A_44_P1112<br>74  | 0.0449 | 1.2185 | up   |         | CA508891         |
| A_42_P7888<br>10  | 0.0198 | 1.6074 | down |         | AW918709         |
| A_43_P1734<br>5   | 0.0388 | 1.3398 | down | Ubp1    | XM_238562        |
| A_44_P3604<br>78  | 0.0390 | 1.4042 | up   |         | AF151373         |
| A_43_P2071<br>7   | 0.0211 | 1.8893 | down | Lars2   | NM_0011087<br>87 |
| A_44_P5409<br>44  | 0.0233 | 1.2413 | down | Plekha5 | AF468695         |
| A_44_P2046<br>48  | 0.0270 | 1.5455 | up   |         | AB040488         |
| A_44_P5087<br>24  | 0.0140 | 1.1483 | up   |         |                  |
| A_44_P2765<br>30  | 0.0128 | 1.4801 | down | Ogfod2  | NM_0011059<br>27 |
| A_44_P3826<br>11  | 0.0448 | 1.2769 | down | Tmub2   | NM_0010316<br>51 |
| A_44_P4062<br>48  | 0.0361 | 1.2046 | down |         | BM392313         |
| A_44_P3433<br>93  | 0.0006 | 1.4981 | down |         | AI009597         |
| A_44_P5276<br>22  | 0.0396 | 1.3183 | up   |         |                  |
| A_44_P1008<br>607 | 0.0151 | 1.2536 | up   |         | XM_341112        |
| A_44_P4638<br>31  | 0.0337 | 1.3568 | down | Zfp423  | NM_053583        |

|                   |        |        |      |                |                  |
|-------------------|--------|--------|------|----------------|------------------|
| A_44_P4621<br>69  | 0.0306 | 1.4651 | up   |                | XM_344035        |
| A_44_P6510<br>53  | 0.0025 | 1.5753 | up   | Supt16h        | NM_0011072<br>61 |
| A_44_P2723<br>53  | 0.0250 | 1.2255 | up   | LOC367117      | NM_0010479<br>19 |
| A_44_P1797<br>87  | 0.0129 | 1.2442 | down | Panx2          | NM_199409        |
| A_44_P6089<br>72  | 0.0051 | 1.3820 | down |                |                  |
| A_44_P1145<br>00  | 0.0278 | 1.4490 | up   | Gipc2          | NM_0010372<br>10 |
| A_44_P7005<br>37  | 0.0317 | 1.2571 | up   | Prdm15         | NM_0011071<br>04 |
| A_44_P5289<br>39  | 0.0003 | 1.8665 | down |                | AA859805         |
| A_43_P1071<br>2   | 0.0017 | 1.1883 | down |                | CO385963         |
| A_43_P1305<br>9   | 0.0498 | 1.1349 | up   | Uba3           | AF336829         |
| A_44_P7769<br>37  | 0.0339 | 1.1081 | down | RGD156019<br>1 | CR754170         |
| A_44_P7421<br>38  | 0.0144 | 1.2272 | up   |                | AW918487         |
| A_44_P5014<br>10  | 0.0090 | 1.6517 | up   |                |                  |
| A_44_P1023<br>480 | 0.0067 | 1.5774 | up   | Snrnp48        | NM_0011061<br>07 |
| A_44_P2776<br>69  | 0.0088 | 1.3593 | up   | RGD155996<br>1 | NM_0011637<br>36 |
| A_44_P6537<br>76  | 0.0103 | 1.3221 | down |                |                  |
| A_44_P1589<br>73  | 0.0034 | 1.2131 | down | Rab35          | NM_0010130<br>46 |
| A_44_P6891<br>18  | 0.0371 | 1.2039 | down |                | CO402250         |
| A_44_P2073<br>69  | 0.0427 | 1.2038 | down |                | BE113217         |
| A_44_P9610<br>09  | 0.0063 | 1.1649 | down |                | FM069449         |
| A_44_P6235<br>37  | 0.0054 | 1.5035 | up   |                |                  |
| A_44_P2966<br>31  | 0.0146 | 1.2495 | up   | Krccl          | NM_0010094<br>13 |

|                   |        |        |      |         |                  |
|-------------------|--------|--------|------|---------|------------------|
| A_42_P5616<br>28  | 0.0053 | 1.5269 | down |         | AW917665         |
| A_44_P5074<br>69  | 0.0014 | 1.5905 | up   | Myof    | XM_220031        |
| A_44_P4127<br>10  | 0.0370 | 1.4121 | down | Adhfe1  | NM_0010254<br>23 |
| A_44_P3287<br>67  | 0.0114 | 1.4911 | down | Smcr7l  | NM_0010077<br>09 |
| A_44_P1017<br>415 | 0.0059 | 1.2183 | up   | Wdr43   | NM_0010377<br>91 |
| A_42_P5277<br>38  | 0.0184 | 1.2310 | down | Nlr1    | NM_0010250<br>10 |
| A_44_P1454<br>08  | 0.0010 | 1.2772 | down |         | CB791980         |
| A_44_P2987<br>09  | 0.0296 | 1.4697 | up   |         | BM986655         |
| A_42_P4713<br>35  | 0.0468 | 1.1780 | down | Znf76   | NM_0011347<br>55 |
| A_43_P1198<br>1   | 0.0491 | 1.1131 | down | Aes     | NM_019220        |
| A_44_P5296<br>72  | 0.0205 | 1.1798 | up   |         |                  |
| A_44_P9628<br>90  | 0.0067 | 1.2312 | up   |         |                  |
| A_44_P1494<br>06  | 0.0132 | 1.4792 | down | Cbr4    | NM_182672        |
| A_44_P1851<br>74  | 0.0087 | 1.3981 | down |         | EX493555         |
| A_44_P1425<br>94  | 0.0191 | 1.1162 | down |         | XM_230719        |
| A_43_P1035<br>3   | 0.0033 | 1.3204 | up   |         | XM_213569        |
| A_44_P7218<br>23  | 0.0006 | 2.5666 | up   | Zbtb20  | NM_0011058<br>80 |
| A_42_P7438<br>25  | 0.0204 | 1.1883 | up   | Psme3   | NM_0010118<br>94 |
| A_44_P2013<br>79  | 0.0102 | 1.3162 | down | Ldb1    | NM_0011076<br>01 |
| A_44_P1990<br>38  | 0.0176 | 1.5501 | down | Zfp385d | NM_0010139<br>92 |
| A_42_P4722<br>74  | 0.0035 | 1.3422 | down | Slurp1  | NM_0011305<br>44 |
| A_44_P5218<br>93  | 0.0037 | 1.3758 | down |         | BG669130         |

|                   |        |        |      |                |                  |
|-------------------|--------|--------|------|----------------|------------------|
| A_44_P1799<br>99  | 0.0303 | 1.1975 | down |                | AJ224680         |
| A_44_P2106<br>63  | 0.0416 | 1.6681 | up   |                | XM_341899        |
| A_44_P5296<br>91  | 0.0208 | 1.2162 | up   | Rbbp8          | NM_0011344<br>17 |
| A_44_P5403<br>04  | 0.0389 | 1.2055 | up   |                | BG671895         |
| A_44_P1003<br>517 | 0.0093 | 1.1505 | up   | Psm6           | NM_198730        |
| A_44_P1201<br>67  | 0.0080 | 1.2490 | up   |                | AW914891         |
| A_44_P3769<br>79  | 0.0172 | 1.1659 | down | Yrdc           | NM_175604        |
| A_44_P1827<br>92  | 0.0455 | 1.1810 | down | Fkbp8          | NM_0010371<br>80 |
| A_44_P4902<br>53  | 0.0045 | 1.3740 | up   | RGD156248<br>9 | XM_0010714<br>19 |
| A_44_P4360<br>63  | 0.0006 | 1.5887 | up   |                |                  |
| A_44_P4736<br>87  | 0.0355 | 1.0907 | up   | Zcrb1          | NM_0010349<br>40 |
| A_44_P7920<br>63  | 0.0014 | 1.2643 | down |                |                  |
| A_44_P9930<br>27  | 0.0129 | 1.2378 | up   | Pla2g16        | NM_017060        |
| A_44_P4005<br>27  | 0.0226 | 1.1587 | up   | Zfp347         | NM_133390        |
| A_44_P3234<br>96  | 0.0334 | 1.3317 | down | Inpp5d         | NM_019311        |
| A_44_P1791<br>65  | 0.0005 | 2.2150 | up   | Fgl2           | NM_053455        |
| A_44_P5849<br>26  | 0.0457 | 2.5636 | up   |                |                  |
| A_44_P7248<br>20  | 0.0003 | 2.1651 | up   |                | BI395747         |
| A_44_P4593<br>22  | 0.0011 | 1.4113 | up   |                | XR_009585        |
| A_44_P6313<br>61  | 0.0454 | 1.2883 | up   |                |                  |
| A_44_P1983<br>15  | 0.0364 | 1.1895 | up   |                | BF523839         |
| A_44_P6933<br>79  | 0.0188 | 1.1241 | down |                |                  |

|                   |        |        |      |                |                  |
|-------------------|--------|--------|------|----------------|------------------|
| A_44_P1567<br>05  | 0.0009 | 1.6048 | up   |                | XM_223490        |
| A_44_P3221<br>18  | 0.0204 | 1.1294 | up   | Rps7           | X56846           |
| A_44_P1038<br>946 | 0.0364 | 1.1455 | up   | Csde1          | NM_054006        |
| A_44_P2501<br>94  | 0.0301 | 1.0987 | up   | G3bp1          | NM_133565        |
| A_44_P5900<br>86  | 0.0471 | 1.5687 | down |                | FM100783         |
| A_42_P5478<br>47  | 0.0499 | 1.2299 | down | Fbp2           | NM_053716        |
| A_44_P9307<br>23  | 0.0233 | 1.4984 | up   |                | XR_009205        |
| A_44_P1970<br>41  | 0.0280 | 1.1837 | down | Ypel5          | NM_0010352<br>21 |
| A_44_P1021<br>01  | 0.0173 | 1.3843 | up   |                | AI073261         |
| A_44_P3764<br>23  | 0.0035 | 1.3702 | up   |                | AI599243         |
| A_44_P7710<br>52  | 0.0278 | 1.4683 | down | Slc41a3        | NM_0010374<br>92 |
| A_44_P4147<br>75  | 0.0293 | 1.1231 | down | Cno            | NM_0011007<br>66 |
| A_44_P4944<br>39  | 0.0243 | 1.1605 | down | Cnnm2          | NM_0010119<br>42 |
| A_44_P3042<br>38  | 0.0475 | 1.5902 | up   | LOC316717      | M58436           |
| A_44_P1005<br>540 | 0.0111 | 1.1953 | up   | Brd7           | NM_0011084<br>40 |
| A_44_P4712<br>17  | 0.0178 | 1.9794 | up   |                |                  |
| A_44_P1848<br>74  | 0.0017 | 1.8139 | up   | RGD156363<br>6 | XM_0010685<br>93 |
| A_44_P8211<br>04  | 0.0196 | 1.5019 | up   |                | AA963229         |
| A_44_P4946<br>96  | 0.0020 | 1.3461 | up   |                |                  |
| A_44_P1942<br>56  | 0.0146 | 1.4661 | down | Gstt2          | NM_012796        |
| A_44_P9328<br>28  | 0.0037 | 1.4381 | up   |                |                  |
| A_44_P1618<br>23  | 0.0020 | 1.7161 | up   | RGD130904<br>9 | NM_0010139<br>56 |

|                  |        |        |      |         |                  |
|------------------|--------|--------|------|---------|------------------|
| A_44_P2212<br>87 | 0.0194 | 1.2505 | down | Cc2d1b  | BC089922         |
| A_44_P2033<br>55 | 0.0204 | 1.5472 | down | Hapln2  | NM_022285        |
| A_44_P7502<br>50 | 0.0339 | 1.2568 | down |         |                  |
| A_44_P6077<br>52 | 0.0287 | 1.6176 | down |         |                  |
| A_44_P3974<br>23 | 0.0341 | 1.2660 | up   | Tmcc3   | NM_0011080<br>84 |
| A_44_P3206<br>55 | 0.0039 | 1.9331 | up   | F2r     | NM_012950        |
| A_43_P1502<br>3  | 0.0302 | 1.3469 | up   | Thbd    | NM_031771        |
| A_43_P1823<br>8  | 0.0322 | 1.3467 | down | Arfip2  | NM_0010042<br>22 |
| A_44_P7512<br>64 | 0.0260 | 1.5318 | up   |         |                  |
| A_44_P2270<br>83 | 0.0369 | 1.1467 | down | Klhl5   | NM_0010470<br>93 |
| A_44_P4685<br>44 | 0.0454 | 1.3969 | down | Cyb5r1  | NM_0010131<br>26 |
| A_44_P1630<br>53 | 0.0371 | 1.4699 | up   |         | AI230440         |
| A_44_P2158<br>17 | 0.0221 | 1.1312 | down | Arih2   | NM_0010122<br>75 |
| A_42_P6273<br>94 | 0.0447 | 1.2121 | down |         | BC089998         |
| A_42_P4707<br>57 | 0.0130 | 1.0891 | down | Rnf34   | NM_0010040<br>75 |
| A_44_P9021<br>99 | 0.0091 | 1.2044 | up   |         |                  |
| A_44_P6050<br>02 | 0.0386 | 1.7775 | up   | Slc45a4 | XM_235397        |
| A_44_P5418<br>30 | 0.0135 | 1.6483 | up   |         | AI233305         |
| A_44_P5247<br>79 | 0.0105 | 1.4132 | down | Slc4a5  | NM_212512        |
| A_44_P4504<br>96 | 0.0018 | 1.3661 | down |         | XM_0010647<br>79 |
| A_43_P1319<br>9  | 0.0467 | 1.3195 | down | Folr1   | NM_133527        |
| A_44_P5632<br>81 | 0.0200 | 1.5047 | up   |         |                  |



|                   |        |        |      |                |                  |
|-------------------|--------|--------|------|----------------|------------------|
| A_44_P1059<br>623 | 0.0111 | 1.1917 | up   |                | XM_231361        |
| A_44_P4206<br>46  | 0.0002 | 1.7558 | up   | Ergic2         | NM_0010249<br>84 |
| A_44_P7005<br>88  | 0.0102 | 1.1838 | up   |                | FM068923         |
| A_44_P9678<br>24  | 0.0389 | 1.4076 | down |                | AW142574         |
| A_44_P2706<br>69  | 0.0119 | 1.1177 | up   |                | DV727326         |
| A_44_P8840<br>37  | 0.0052 | 1.1890 | up   |                |                  |
| A_44_P4388<br>49  | 0.0417 | 1.1450 | up   | Mrpl22         | NM_0011057<br>81 |
| A_42_P6842<br>64  | 0.0047 | 1.4112 | down | RGD156181<br>7 | NM_0011064<br>22 |
| A_44_P6397<br>05  | 0.0151 | 1.2966 | up   |                |                  |
| A_44_P6076<br>32  | 0.0028 | 1.3625 | down | Tmem121        | XM_0010792<br>43 |
| A_44_P3915<br>99  | 0.0389 | 1.2452 | down | Tbc1d7         | NM_0011084<br>11 |
| A_44_P1005<br>199 | 0.0027 | 1.6604 | up   | Lrig3          | BC168689         |
| A_44_P2121<br>02  | 0.0292 | 1.4986 | up   |                | AI044349         |
| A_44_P9781<br>50  | 0.0495 | 1.1894 | up   |                |                  |
| A_44_P1121<br>92  | 0.0479 | 1.1704 | down | Ankrd28        | XM_224620        |
| A_44_P5185<br>23  | 0.0193 | 1.2862 | down | Ankrd39        | NM_0011350<br>14 |
| A_43_P2319<br>7   | 0.0230 | 1.2135 | up   | MGC95208       | NM_0010055<br>52 |
| A_42_P5721<br>23  | 0.0470 | 1.2842 | down | Fxyd1          | NM_031648        |
| A_44_P6818<br>36  | 0.0279 | 1.2898 | up   |                | CO572285         |
| A_44_P1023<br>264 | 0.0422 | 1.1162 | up   | Slc37a4        | NM_031589        |
| A_44_P7882<br>69  | 0.0064 | 1.3022 | up   |                | DV720777         |
| A_44_P1376<br>99  | 0.0316 | 1.3716 | down | Mpst           | NM_138843        |

|                  |        |        |      |          |                  |
|------------------|--------|--------|------|----------|------------------|
| A_43_P1199<br>7  | 0.0072 | 1.6311 | up   | Klrc2    | NM_019261        |
| A_44_P7295<br>72 | 0.0160 | 1.1257 | up   | Nfatc3   | NM_0011084<br>47 |
| A_44_P2878<br>03 | 0.0165 | 1.3604 | up   |          | AA996470         |
| A_44_P2064<br>39 | 0.0092 | 1.3355 | up   |          | XM_222435        |
| A_42_P5619<br>46 | 0.0393 | 1.1098 | up   | Pex12    | NM_053921        |
| A_44_P8806<br>18 | 0.0378 | 1.1683 | down | Slc25a36 | XM_576451        |
| A_44_P4030<br>65 | 0.0075 | 1.3036 | up   |          |                  |
| A_44_P1807<br>31 | 0.0226 | 1.4733 | down | Zfpm2    | NM_0011305<br>01 |
| A_44_P2626<br>08 | 0.0397 | 1.2744 | up   | Bdp1     | NM_0011064<br>03 |
| A_44_P1621<br>15 | 0.0499 | 1.3476 | up   |          | CV079281         |
| A_44_P2427<br>04 | 0.0182 | 1.1959 | down |          | BE329450         |
| A_43_P1065<br>6  | 0.0116 | 1.7103 | down | Casc4    | XM_342506        |
| A_44_P5186<br>73 | 0.0020 | 1.4014 | down | Epb4.9   | NM_0011083<br>85 |
| A_44_P7021<br>92 | 0.0046 | 1.7397 | up   |          |                  |
| A_44_P8503<br>36 | 0.0004 | 1.8108 | up   |          | BG673380         |
| A_44_P2047<br>89 | 0.0175 | 1.1720 | down | Pex11b   | NM_0010256<br>84 |
| A_44_P7573<br>72 | 0.0138 | 1.3989 | down |          | XM_0010579<br>87 |
| A_44_P8065<br>60 | 0.0081 | 1.5261 | up   |          |                  |
| A_44_P6516<br>72 | 0.0064 | 1.3937 | up   |          |                  |
| A_44_P5060<br>39 | 0.0223 | 1.3767 | down | Tsc1     | NM_021854        |
| A_44_P9963<br>38 | 0.0204 | 1.2002 | up   | Arid4a   | NM_0011080<br>29 |
| A_44_P3138<br>15 | 0.0052 | 1.3267 | down | Tesk2    | NM_133396        |

|                   |        |        |      |                |                  |
|-------------------|--------|--------|------|----------------|------------------|
| A_44_P2864<br>71  | 0.0348 | 1.1668 | up   | Sec24a         | NM_0011057<br>80 |
| A_44_P7275<br>04  | 0.0333 | 1.4401 | down |                | BF289421         |
| A_44_P3107<br>71  | 0.0466 | 1.1626 | up   |                | DY471696         |
| A_44_P4797<br>77  | 0.0284 | 1.2547 | up   |                | AI105455         |
| A_42_P6226<br>23  | 0.0362 | 1.3223 | down | Tbc1d10a       | BC093603         |
| A_44_P4842<br>28  | 0.0447 | 1.5513 | down |                | AI104132         |
| A_43_P1269<br>8   | 0.0413 | 1.1298 | down | Lgals3         | NM_031832        |
| A_44_P5080<br>19  | 0.0199 | 1.0761 | down | Mapkapk5       | NM_0010257<br>61 |
| A_44_P1055<br>06  | 0.0153 | 1.3748 | up   |                |                  |
| A_43_P1570<br>9   | 0.0377 | 1.1149 | down | Sra1           | NM_183329        |
| A_44_P1581<br>07  | 0.0345 | 1.4650 | down | Sorbs2         | NM_053770        |
| A_44_P1747<br>49  | 0.0434 | 1.7014 | down |                | BF396509         |
| A_44_P6681<br>37  | 0.0114 | 1.4085 | down | Sf3a1          | NM_0011072<br>35 |
| A_44_P4056<br>55  | 0.0123 | 1.0987 | up   | LOC499339      | NM_0010250<br>36 |
| A_43_P1786<br>8   | 0.0487 | 1.7231 | down | Gdpd2          | NM_0011069<br>44 |
| A_43_P1876<br>8   | 0.0203 | 1.4393 | down | Ace2           | NM_0010120<br>06 |
| A_43_P1525<br>9   | 0.0117 | 1.1662 | up   | Tnfrsf1a       | NM_013091        |
| A_44_P6085<br>19  | 0.0005 | 1.8899 | up   | RGD156466<br>4 | NM_0011100<br>55 |
| A_44_P1016<br>309 | 0.0015 | 1.2101 | down | Dis3l2         | NM_0011090<br>07 |
| A_44_P4123<br>49  | 0.0103 | 1.4589 | up   |                |                  |
| A_44_P6228<br>41  | 0.0083 | 1.4625 | up   |                |                  |
| A_43_P1047<br>4   | 0.0365 | 1.1786 | up   |                |                  |

|                   |        |        |      |                  |                  |
|-------------------|--------|--------|------|------------------|------------------|
| A_44_P1016<br>829 | 0.0243 | 1.2849 | up   | Trib1            | NM_023985        |
| A_44_P2369<br>55  | 0.0080 | 1.5281 | down |                  | BF555796         |
| A_44_P3297<br>84  | 0.0249 | 1.1930 | up   | RGD156558<br>4   | NM_0011062<br>79 |
| A_44_P1447<br>96  | 0.0005 | 1.5076 | up   |                  | XM_341403        |
| A_44_P1697<br>37  | 0.0408 | 1.1272 | up   |                  | BQ782032         |
| A_44_P7825<br>53  | 0.0320 | 1.6492 | down |                  |                  |
| A_44_P5559<br>76  | 0.0242 | 1.2974 | up   |                  | BM388581         |
| A_44_P1251<br>60  | 0.0087 | 1.3611 | up   |                  | AA849965         |
| A_44_P4145<br>09  | 0.0406 | 1.1592 | up   |                  | U08214           |
| A_44_P3191<br>80  | 0.0045 | 1.4507 | down |                  | BC098809         |
| A_44_P3779<br>65  | 0.0226 | 1.2054 | up   |                  | AI102620         |
| A_44_P5112<br>54  | 0.0106 | 1.3129 | up   |                  | XM_229109        |
| A_44_P1006<br>60  | 0.0012 | 1.6190 | up   | LOC100362<br>391 | XM_0027284<br>89 |
| A_44_P1001<br>914 | 0.0154 | 1.2848 | up   | Ccdc93           | NM_0010249<br>97 |
| A_44_P4710<br>53  | 0.0285 | 1.0861 | up   | Rg9mtd2          | NM_0010442<br>32 |
| A_44_P1609<br>43  | 0.0443 | 1.0581 | down | Zfyve27          | NM_199104        |
| A_44_P5405<br>70  | 0.0008 | 1.7347 | up   | Cox7c            | NM_0011347<br>05 |
| A_44_P7480<br>50  | 0.0165 | 1.1935 | up   |                  |                  |
| A_44_P3389<br>62  | 0.0451 | 1.1549 | down | Taf5l            | NM_0011074<br>42 |
| A_44_P4492<br>82  | 0.0073 | 1.4236 | up   |                  | BI294916         |
| A_44_P8336<br>26  | 0.0173 | 1.1414 | up   | Pls3             | NM_031084        |
| A_44_P6505<br>50  | 0.0475 | 1.2762 | up   |                  | BF289404         |

|                  |        |        |      |           |                  |
|------------------|--------|--------|------|-----------|------------------|
| A_44_P2088<br>87 | 0.0348 | 1.3422 | down | Rpusd1    | NM_0011057<br>74 |
| A_44_P2570<br>58 | 0.0025 | 1.7777 | up   | Adamts1   | AF149118         |
| A_44_P3068<br>10 | 0.0220 | 1.3138 | down | Trpt1     | NM_0011063<br>31 |
| A_42_P6366<br>08 | 0.0370 | 1.2015 | down | Zkscan3   | NM_0010120<br>53 |
| A_44_P5873<br>35 | 0.0438 | 1.5054 | up   |           | BF389602         |
| A_44_P4372<br>03 | 0.0005 | 2.8026 | up   |           | CF110025         |
| A_42_P6610<br>18 | 0.0459 | 1.1382 | up   | Phlpp1    | NM_021657        |
| A_44_P1240<br>91 | 0.0031 | 1.1971 | up   |           | XM_232669        |
| A_44_P2101<br>16 | 0.0495 | 1.0763 | down | Twf1      | NM_0010085<br>21 |
| A_44_P7451<br>00 | 0.0122 | 1.1743 | up   | Cisd2     | XM_215704        |
| A_44_P2639<br>57 | 0.0098 | 1.3341 | up   | Oxr1      | BC166763         |
| A_44_P4504<br>71 | 0.0264 | 1.2889 | down | Ppp1r16a  | NM_0011305<br>66 |
| A_44_P8116<br>06 | 0.0426 | 1.1666 | up   | Ripk2     | BC107468         |
| A_43_P2028<br>5  | 0.0393 | 1.2413 | down |           | CB548449         |
| A_44_P9958<br>87 | 0.0010 | 1.3989 | up   |           |                  |
| A_44_P4450<br>31 | 0.0395 | 1.2626 | down | Fbxo32    | NM_133521        |
| A_44_P5415<br>82 | 0.0289 | 1.4583 | down |           | XM_343383        |
| A_44_P8844<br>37 | 0.0018 | 1.6851 | up   |           |                  |
| A_42_P7434<br>95 | 0.0121 | 1.2029 | up   | Rwdd1     | NM_147146        |
| A_44_P1123<br>22 | 0.0042 | 1.4913 | up   |           | XR_006437        |
| A_44_P5325<br>57 | 0.0128 | 1.4804 | down | LOC304131 | NM_0010139<br>79 |
| A_44_P4439<br>16 | 0.0130 | 1.3141 | up   | Fam102b   | NM_0011635<br>68 |

|                   |        |        |      |                  |                  |
|-------------------|--------|--------|------|------------------|------------------|
| A_44_P2695<br>82  | 0.0003 | 2.0315 | up   | Dusp8            | NM_0011085<br>10 |
| A_44_P5519<br>09  | 0.0174 | 1.1957 | up   | Ep400            | NM_0011071<br>49 |
| A_44_P2723<br>09  | 0.0024 | 1.6189 | up   | LOC100362<br>125 | XM_0027267<br>10 |
| A_44_P3040<br>11  | 0.0226 | 1.2206 | down | Tmem132a         | NM_178021        |
| A_44_P5749<br>59  | 0.0190 | 1.2778 | down | LOC681694        | NM_0010442<br>79 |
| A_44_P3361<br>48  | 0.0203 | 1.2164 | down |                  | DV717140         |
| A_44_P4627<br>53  | 0.0473 | 1.2365 | up   | Ahsa2            | NM_0011072<br>41 |
| A_44_P8583<br>98  | 0.0189 | 1.3536 | down | LOC498145        | NM_0010174<br>85 |
| A_44_P4525<br>12  | 0.0035 | 1.2080 | up   |                  |                  |
| A_44_P4501<br>07  | 0.0203 | 1.3608 | up   | RGD156007<br>6   | XM_0010739<br>16 |
| A_43_P1306<br>6   | 0.0185 | 1.1230 | down | Echs1            | NM_078623        |
| A_44_P4029<br>95  | 0.0389 | 1.1725 | up   |                  |                  |
| A_44_P2620<br>78  | 0.0499 | 1.4266 | up   | Gfi1             | NM_012566        |
| A_44_P4856<br>40  | 0.0005 | 1.2099 | up   | RGD156545<br>9   | XM_0010816<br>26 |
| A_44_P4265<br>41  | 0.0180 | 1.1929 | down | Arhgap24         | NM_0010120<br>32 |
| A_44_P1039<br>809 | 0.0289 | 1.2149 | up   | Rasip1           | NM_0011062<br>61 |
| A_44_P5286<br>21  | 0.0287 | 1.2614 | down | Hadh             | NM_057186        |
| A_44_P4440<br>34  | 0.0073 | 1.3075 | up   | Zfp748           | XM_0010563<br>56 |
| A_44_P5837<br>74  | 0.0001 | 2.6213 | up   |                  | BF286548         |
| A_44_P5531<br>70  | 0.0418 | 1.2104 | down | RGD130739<br>9   | NM_0010480<br>43 |
| A_44_P9920<br>56  | 0.0069 | 1.7605 | up   | Tmem106a         | NM_0010249<br>67 |
| A_44_P8985<br>66  | 0.0201 | 1.4528 | up   |                  |                  |

|                   |        |        |      |           |                  |
|-------------------|--------|--------|------|-----------|------------------|
| A_44_P3987<br>92  | 0.0002 | 1.4184 | up   | Tpt1      | NM_053867        |
| A_44_P4903<br>24  | 0.0390 | 1.3152 | up   |           | XM_0027288<br>96 |
| A_42_P4549<br>90  | 0.0363 | 1.1295 | up   |           | XM_0027294<br>25 |
| A_44_P1007<br>247 | 0.0402 | 1.1469 | up   | Elmo2     | NM_0011349<br>55 |
| A_44_P4285<br>75  | 0.0011 | 1.5854 | up   |           | AY321319         |
| A_43_P2126<br>9   | 0.0468 | 1.2697 | up   |           | CB546606         |
| A_44_P1120<br>98  | 0.0006 | 1.5642 | up   |           |                  |
| A_44_P3062<br>96  | 0.0405 | 1.1495 | up   |           | BI303604         |
| A_44_P5327<br>54  | 0.0367 | 1.1223 | up   | Pbx3      | NM_0011078<br>34 |
| A_44_P5215<br>87  | 0.0074 | 1.2707 | up   | Arhgef3   | NM_0011060<br>61 |
| A_44_P2851<br>61  | 0.0410 | 1.2570 | up   |           | AI101103         |
| A_44_P3034<br>92  | 0.0381 | 1.2897 | up   |           | AI168935         |
| A_42_P5407<br>74  | 0.0476 | 1.1175 | down | Acadm     | NM_016986        |
| A_44_P3497<br>69  | 0.0106 | 1.3962 | up   |           | XM_227850        |
| A_43_P1803<br>9   | 0.0378 | 1.1979 | up   | Map3k7ip2 | NM_0010120<br>62 |
| A_44_P3047<br>52  | 0.0023 | 1.3630 | up   |           | XM_226367        |
| A_44_P8376<br>44  | 0.0001 | 2.6208 | up   | Ankfy1    | NM_0011070<br>18 |
| A_44_P2779<br>57  | 0.0054 | 1.3308 | up   |           | AA997603         |
| A_44_P3855<br>79  | 0.0384 | 1.1052 | up   |           | AW918085         |
| A_44_P6108<br>36  | 0.0042 | 1.8688 | up   |           | CO570498         |
| A_44_P3810<br>08  | 0.0356 | 1.2250 | up   |           | BI285943         |
| A_44_P1652<br>03  | 0.0250 | 1.1874 | up   |           | AA996426         |

|                   |        |        |      |         |                  |
|-------------------|--------|--------|------|---------|------------------|
| A_44_P4722<br>71  | 0.0287 | 1.2547 | up   | Rgl1    | NM_0011059<br>57 |
| A_44_P4138<br>25  | 0.0053 | 1.2462 | up   |         | CA508891         |
| A_44_P1024<br>476 | 0.0281 | 1.2079 | up   | Kif13a  | NM_0011074<br>62 |
| A_44_P4596<br>79  | 0.0249 | 1.3553 | up   |         | XR_006781        |
| A_42_P5291<br>93  | 0.0123 | 1.2541 | up   | Sdhc    | NM_0010055<br>34 |
| A_44_P7138<br>33  | 0.0201 | 2.1413 | down |         | XM_575015        |
| A_44_P7452<br>53  | 0.0231 | 1.1094 | up   |         |                  |
| A_44_P5147<br>81  | 0.0102 | 1.3340 | up   |         | BQ782745         |
| A_44_P8084<br>51  | 0.0254 | 1.2476 | down |         |                  |
| A_44_P8233<br>17  | 0.0159 | 1.1218 | down |         |                  |
| A_44_P8481<br>09  | 0.0401 | 1.2533 | up   |         | AW916604         |
| A_44_P3090<br>81  | 0.0295 | 1.3298 | down | Hspa2   | NM_021863        |
| A_44_P2901<br>68  | 0.0156 | 1.1895 | down | Fah     | NM_017181        |
| A_44_P5277<br>98  | 0.0015 | 2.1677 | up   |         | AABR030558<br>81 |
| A_44_P2509<br>00  | 0.0074 | 1.5536 | up   |         | XR_008936        |
| A_44_P4445<br>39  | 0.0021 | 1.2990 | up   |         | AI578566         |
| A_44_P5578<br>85  | 0.0067 | 1.2483 | up   |         |                  |
| A_43_P1581<br>9   | 0.0275 | 2.1644 | down | Prss22  | NM_0011069<br>84 |
| A_43_P1053<br>8   | 0.0394 | 1.1011 | up   | Pex19   | NM_0011073<br>75 |
| A_44_P7768<br>57  | 0.0086 | 1.2471 | up   |         | AW920955         |
| A_44_P9995<br>32  | 0.0149 | 1.2079 | up   | Rpl36al | NM_031105        |
| A_44_P4079<br>54  | 0.0500 | 1.2657 | up   |         | XM_228823        |



|                  |        |        |    |          |
|------------------|--------|--------|----|----------|
| A_44_P1722<br>86 | 0.0139 | 1.7614 | up | AI072186 |
| A_44_P2536<br>23 | 0.0497 | 1.2509 | up | BF558976 |

---

S2 Table Analyzed transcriptomics parameters of lung tissue of Bufei Jianpi formula-treated rats

| ProbeName     | P-value(B_vs_D) | FCAbsolute(B_vs_D) | regulation(B_vs_D) | GeneSymbol | GenbankAccession |
|---------------|-----------------|--------------------|--------------------|------------|------------------|
| A_42_P504653  | 0.028773        | 2.27091            | down               | F10        | NM_017143        |
| A_44_P549509  | 0.025315        | 1.115081           | up                 | Rbm6       | NM_001108186     |
| A_44_P884555  | 0.005092        | 1.239808           | up                 |            | BE113337         |
| A_44_P675887  | 7.67E-04        | 1.349034           | down               |            | AW920694         |
| A_42_P799113  | 0.03482         | 1.342838           | up                 | Egfl7      | NM_139104        |
| A_44_P177907  | 0.038628        | 1.083391           | up                 | Rccd1      | XM_218819        |
| A_44_P745811  | 0.0413          | 1.49267            | down               |            |                  |
| A_43_P14304   | 0.044091        | 1.16404            | up                 |            |                  |
| A_43_P12841   | 0.013861        | 1.382113           | up                 | Enpp1      | NM_053535        |
| A_44_P150185  | 0.039139        | 1.180293           | up                 | Ltbp2      | NM_021586        |
| A_44_P1013851 | 0.012401        | 1.282629           | up                 | Bmp2       | NM_017178        |
| A_42_P635881  | 0.023532        | 1.254802           | down               | Slc32a1    | NM_031782        |
| A_44_P868890  | 0.004368        | 1.277633           | up                 | Gli2       | NM_001107169     |
| A_42_P602724  | 0.031219        | 1.900892           | down               | Ubd        | NM_053299        |
| A_43_P12708   | 0.007842        | 1.193455           | up                 | Src        | NM_031977        |
| A_44_P241799  | 0.016773        | 1.489082           | up                 |            | AI170252         |
| A_42_P693715  | 0.036801        | 1.104317           | up                 |            | AI412866         |
| A_44_P462107  | 0.049641        | 1.216739           | up                 | Dst        | NM_001108208     |
| A_44_P974594  | 0.046572        | 1.301499           | down               | Lrriq3     | NM_001024307     |

|                  |          |          |      |                |                  |
|------------------|----------|----------|------|----------------|------------------|
| A_44_P519<br>345 | 7.99E-04 | 1.131574 | up   |                | CF110294         |
| A_44_P666<br>786 | 0.022389 | 1.162318 | up   | Akt1s1         | NM_001106<br>259 |
| A_44_P760<br>031 | 0.010481 | 1.153259 | up   | Rab11fip3      | BC081997         |
| A_44_P324<br>554 | 0.035905 | 1.276778 | up   |                | BF523761         |
| A_44_P150<br>137 | 0.004656 | 1.396633 | up   |                | AA924386         |
| A_44_P885<br>330 | 0.021444 | 1.113343 | down |                |                  |
| A_43_P208<br>27  | 0.049426 | 1.435569 | down | RGD15662<br>43 | NM_001134<br>635 |
| A_44_P256<br>188 | 0.012095 | 7.047386 | up   |                | BC103490         |
| A_44_P681<br>677 | 0.021552 | 1.239688 | up   |                | BF289693         |
| A_44_P102<br>265 | 0.048773 | 1.342857 | up   |                | AI227928         |
| A_43_P131<br>89  | 0.023759 | 1.198553 | up   | Ppp1r14c       | NM_133425        |
| A_44_P431<br>109 | 0.043015 | 1.544165 | up   | Irs1           | NM_012969        |
| A_43_P115<br>29  | 0.039487 | 1.373952 | up   | Calcr1         | NM_012717        |
| A_44_P852<br>219 | 0.045337 | 1.201692 | down |                |                  |
| A_44_P992<br>854 | 0.034831 | 1.643763 | up   | Rhoa           | BC061732         |
| A_44_P566<br>326 | 0.002925 | 1.413695 | up   |                |                  |
| A_44_P430<br>083 | 0.021573 | 1.192111 | up   | Far2           | XM_575726        |
| A_43_P123<br>55  | 0.018071 | 1.298148 | up   | Lphn1          | NM_022962        |
| A_43_P171<br>31  | 0.011467 | 1.303371 | up   | LOC30202<br>2  | NM_001127<br>530 |
| A_44_P213<br>415 | 0.032331 | 1.299912 | up   | Vdac1          | NM_031353        |
| A_44_P763<br>162 | 0.029935 | 1.141378 | up   | Ptpn4          | NM_001100<br>479 |
| A_44_P323<br>404 | 0.018114 | 1.273304 | up   | Cntf           | NM_013166        |

|                   |          |          |      |          |                  |
|-------------------|----------|----------|------|----------|------------------|
| A_42_P517<br>515  | 0.013223 | 1.267232 | down | Fam96a   | NM_001008<br>327 |
| A_44_P390<br>700  | 0.030168 | 1.436274 | down | Fhl2     | NM_031677        |
| A_44_P131<br>583  | 0.007149 | 1.20162  | up   |          | DV729096         |
| A_44_P328<br>664  | 0.048655 | 1.116947 | down |          | XM_233179        |
| A_44_P100<br>847  | 0.02768  | 1.287002 | down | Ttc7     | NM_001100<br>756 |
| A_44_P513<br>903  | 0.029823 | 1.180817 | up   |          | CB781747         |
| A_44_P102<br>0311 | 0.025164 | 1.277252 | up   |          | XR_085753        |
| A_44_P788<br>091  | 0.014293 | 1.374002 | up   |          | CK839277         |
| A_44_P478<br>340  | 0.008026 | 1.960517 | down | Msc      | CX569607         |
| A_43_P101<br>70   | 0.014269 | 1.23452  | up   |          | CB545779         |
| A_44_P640<br>481  | 0.005148 | 1.174617 | up   |          |                  |
| A_44_P340<br>884  | 0.034594 | 1.202143 | up   |          | XM_343922        |
| A_44_P143<br>349  | 0.034068 | 1.168152 | up   | Arfip1   | NM_021763        |
| A_44_P350<br>098  | 0.037128 | 1.195947 | down | Alg9     | NM_001109<br>000 |
| A_44_P195<br>306  | 0.021864 | 1.129777 | up   | Ywhab    | NM_019377        |
| A_44_P555<br>567  | 0.027648 | 1.378138 | up   | Zfp407   | XM_225679        |
| A_44_P543<br>965  | 0.020931 | 1.231276 | up   |          |                  |
| A_44_P807<br>294  | 0.039468 | 1.140112 | down | Cyb561d1 | NM_001108<br>562 |
| A_44_P364<br>792  | 0.028993 | 1.335156 | up   |          | BI288898         |
| A_44_P669<br>569  | 0.030666 | 1.345512 | down |          |                  |
| A_42_P749<br>820  | 0.015172 | 1.338552 | down | Cdh13    | NM_138889        |
| A_44_P100<br>1517 | 0.002912 | 1.880745 | up   |          | AA963004         |

|                  |          |          |      |         |                  |
|------------------|----------|----------|------|---------|------------------|
| A_44_P732<br>138 | 0.010413 | 1.454839 | up   |         |                  |
| A_44_P291<br>755 | 0.028723 | 1.310811 | up   |         | AI230320         |
| A_42_P568<br>060 | 0.002534 | 1.143599 | up   | Ppp4r2  | NM_001106<br>613 |
| A_44_P681<br>064 | 0.009676 | 1.542779 | up   |         | CO405369         |
| A_44_P902<br>209 | 0.003503 | 1.123739 | up   | Add1    | NM_016990        |
| A_44_P546<br>432 | 0.022325 | 1.781387 | up   |         |                  |
| A_44_P512<br>575 | 0.038396 | 1.22666  | up   |         | BG378190         |
| A_44_P140<br>248 | 0.037472 | 1.626414 | down | Hfe2    | NM_001012<br>080 |
| A_44_P255<br>236 | 0.048772 | 1.29992  | down | Acta1   | NM_019212        |
| A_43_P108<br>74  | 0.043171 | 1.3779   | down | Tpm2    | NM_001024<br>345 |
| A_44_P456<br>256 | 0.001397 | 1.595391 | up   |         | AA925161         |
| A_44_P830<br>181 | 0.042964 | 1.335595 | up   |         |                  |
| A_44_P684<br>242 | 0.015499 | 1.387717 | up   |         |                  |
| A_43_P123<br>34  | 0.048445 | 1.51185  | down | Ptprq   | NM_022925        |
| A_44_P884<br>698 | 0.040888 | 1.160761 | up   | Ptpn4   | NM_001100<br>479 |
| A_44_P219<br>712 | 0.048296 | 2.793683 | up   | Ostn    | AY398682         |
| A_43_P155<br>72  | 0.042151 | 1.316937 | up   | Vegfa   | NM_031836        |
| A_44_P250<br>476 | 0.047867 | 1.261423 | down | Zdhhc13 | NM_001039<br>037 |
| A_44_P836<br>445 | 0.041491 | 1.413331 | up   | Aph1a   | NM_001014<br>255 |
| A_44_P183<br>142 | 0.046541 | 1.293191 | up   |         | XM_343286        |
| A_44_P371<br>798 | 0.027338 | 1.22287  | up   |         | AI136559         |
| A_44_P295<br>680 | 0.040471 | 1.496738 | up   |         | AI385133         |

|                   |          |          |      |                |                  |
|-------------------|----------|----------|------|----------------|------------------|
| A_44_P102<br>1246 | 0.033379 | 1.197418 | up   |                | AA965157         |
| A_44_P139<br>211  | 0.033038 | 1.223524 | up   |                | AA925900         |
| A_44_P105<br>984  | 0.036916 | 1.216695 | up   |                | BF406511         |
| A_44_P443<br>019  | 0.03969  | 1.196242 | down |                | XR_008646        |
| A_43_P174<br>73   | 0.035322 | 1.154898 | up   | Bcl9           | NM_001107<br>703 |
| A_44_P396<br>123  | 0.032076 | 1.174195 | up   | S100a16        | NM_001108<br>557 |
| A_44_P912<br>777  | 0.048744 | 1.099597 | up   | RGD13105<br>53 | NM_001008<br>517 |
| A_44_P647<br>819  | 0.012311 | 1.173471 | up   |                | AW142419         |
| A_44_P538<br>658  | 0.011296 | 1.277675 | down | Slc7a7         | NM_031341        |
| A_42_P582<br>777  | 0.04219  | 1.177679 | up   | Mapk1ip1       | NM_001122<br>782 |
| A_44_P729<br>285  | 0.030086 | 1.212834 | up   |                |                  |
| A_44_P260<br>891  | 0.045041 | 1.299453 | up   |                | BU759568         |
| A_44_P442<br>546  | 0.01255  | 1.318633 | down | Prm1           | NM_001002<br>850 |
| A_44_P458<br>494  | 0.01353  | 1.20554  | up   |                | AA924972         |
| A_44_P352<br>820  | 0.020979 | 1.25244  | up   |                | AA892319         |
| A_44_P350<br>709  | 0.030723 | 1.302478 | up   |                | BF285026         |
| A_44_P134<br>561  | 0.0064   | 1.374067 | down | Aifm2          | NM_001139<br>483 |
| A_44_P881<br>169  | 0.020869 | 1.218604 | up   |                | BE329329         |
| A_42_P469<br>142  | 0.011669 | 1.23588  | up   | Lmo7           | NM_001001<br>515 |
| A_43_P112<br>15   | 0.048721 | 1.073104 | up   | Pdcd5          | NM_001106<br>247 |
| A_43_P134<br>51   | 0.037792 | 1.31538  | up   | Apbb2          | XM_223399        |
| A_44_P277<br>719  | 0.022251 | 1.354008 | up   |                | BF393654         |

|                  |          |          |      |                |                  |
|------------------|----------|----------|------|----------------|------------------|
| A_44_P213<br>246 | 0.008418 | 1.5334   | down | RGD13104<br>95 | XM_228270        |
| A_44_P402<br>193 | 0.043799 | 1.225168 | up   |                | BQ193921         |
| A_44_P183<br>359 | 0.008398 | 1.10796  | up   | C2cd2l         | NM_001011<br>996 |
| A_44_P396<br>507 | 0.045661 | 1.133644 | up   | Pelp1          | NM_001024<br>270 |
| A_44_P189<br>832 | 0.027207 | 1.151361 | down | Myst3          | NM_001100<br>570 |
| A_44_P875<br>945 | 0.022812 | 1.41847  | down |                | BI296619         |
| A_44_P394<br>925 | 0.017129 | 1.392447 | up   |                | AI137780         |
| A_44_P350<br>888 | 0.007492 | 1.489608 | up   |                | AA957004         |
| A_44_P403<br>133 | 0.034579 | 1.531064 | down |                | XM_344628        |
| A_42_P797<br>381 | 0.042554 | 1.74748  | down | Tap2           | NM_032056        |
| A_44_P650<br>755 | 0.026896 | 1.180229 | down |                | BG673332         |
| A_44_P209<br>926 | 0.04695  | 1.24626  | down | Hectd1         | XM_343060        |
| A_44_P247<br>810 | 0.048511 | 1.487668 | down | Olr327         | NM_001000<br>249 |
| A_44_P545<br>107 | 0.04951  | 1.350205 | up   |                | BQ192866         |
| A_44_P254<br>540 | 0.023759 | 1.269833 | up   |                | AW915585         |
| A_44_P297<br>596 | 0.012848 | 1.290254 | up   | Ctnnd1         | NM_001107<br>740 |
| A_43_P127<br>09  | 0.009717 | 1.525424 | down | Trpv1          | NM_031982        |
| A_44_P427<br>560 | 0.038973 | 1.131652 | up   | Pom121         | NM_053622        |
| A_42_P794<br>052 | 0.041621 | 1.382314 | down |                | XM_001077<br>260 |
| A_44_P900<br>888 | 0.027105 | 1.264457 | up   |                | DY472577         |
| A_44_P546<br>352 | 0.001521 | 1.238166 | up   | Tmtc3          | NM_001135<br>858 |
| A_44_P387<br>808 | 0.04423  | 1.248965 | up   |                | BQ195079         |

|                   |          |          |      |          |                  |
|-------------------|----------|----------|------|----------|------------------|
| A_44_P354<br>208  | 0.036799 | 1.34872  | up   |          | XM_232315        |
| A_44_P431<br>465  | 0.022778 | 1.349873 | up   | Sema3e   | NM_001106<br>579 |
| A_44_P552<br>118  | 0.041881 | 1.100154 | up   | Cnih     | NM_001106<br>029 |
| A_44_P352<br>402  | 0.006933 | 1.440486 | down |          | BE101481         |
| A_44_P220<br>861  | 0.049427 | 1.26788  | up   | Npff     | NM_022586        |
| A_44_P100<br>207  | 0.037451 | 1.505863 | down | Cnp      | NM_012809        |
| A_44_P380<br>771  | 0.045402 | 1.241053 | up   |          | CB327159         |
| A_44_P415<br>406  | 0.025778 | 1.259024 | up   |          | AA858773         |
| A_44_P622<br>216  | 0.026821 | 1.363821 | up   | Snx19    | NM_001108<br>131 |
| A_44_P325<br>439  | 0.049371 | 1.127359 | up   | Fbxw4    | NM_001107<br>600 |
| A_44_P552<br>006  | 0.035716 | 1.213517 | up   |          | AI178635         |
| A_42_P657<br>494  | 0.038573 | 1.225667 | down | Fam103a1 | NM_001127<br>451 |
| A_44_P220<br>351  | 0.035949 | 1.208386 | up   | Wasl     | NM_001110<br>365 |
| A_44_P164<br>824  | 0.045392 | 1.189651 | up   | Ttyh3    | NM_001107<br>124 |
| A_44_P999<br>869  | 0.003107 | 1.13454  | up   | Ptpn11   | NM_013088        |
| A_44_P102<br>4721 | 0.037133 | 1.666759 | down | Slc28a2  | NM_031664        |
| A_44_P503<br>579  | 0.0329   | 1.101602 | up   | Rpl17    | NM_201415        |
| A_42_P557<br>394  | 0.013997 | 1.584819 | down | Isg20    | NM_001008<br>510 |
| A_44_P128<br>711  | 0.020819 | 1.179122 | down | Sh3bgrl  | NM_001173<br>339 |
| A_44_P519<br>948  | 0.039512 | 1.596389 | down | Fcar     | NM_201992        |
| A_44_P963<br>064  | 0.030115 | 1.304174 | up   |          |                  |
| A_44_P202<br>161  | 0.015905 | 1.322265 | up   |          | CB547705         |



|                  |          |          |      |        |                  |
|------------------|----------|----------|------|--------|------------------|
| A_44_P701<br>236 | 0.038934 | 1.376749 | up   |        |                  |
| A_44_P121<br>051 | 0.040264 | 1.116592 | up   | Rpl17  | NM_201415        |
| A_44_P489<br>688 | 0.011744 | 1.377629 | down | B3gnt8 | NM_001107<br>492 |
| A_44_P510<br>809 | 0.023771 | 1.20106  | up   | Ptk2   | NM_013081        |
| A_44_P929<br>767 | 0.004409 | 1.43826  | up   | Sdc3   | NM_053893        |
| A_44_P868<br>139 | 0.010494 | 1.252712 | down |        |                  |
| A_44_P976<br>992 | 0.024816 | 1.749747 | down |        |                  |
| A_42_P836<br>063 | 0.043446 | 1.165825 | down | Kbtbd3 | NM_001108<br>121 |
| A_44_P424<br>087 | 0.049143 | 1.178908 | up   | Iqgap1 | NM_001108<br>489 |
| A_42_P760<br>177 | 0.047886 | 1.175335 | up   | Macf1  | NM_001135<br>758 |
| A_44_P116<br>870 | 0.027307 | 1.361408 | up   | Dclk2  | NM_001009<br>691 |
| A_44_P208<br>415 | 0.030412 | 1.202479 | down |        | XM_223330        |
| A_44_P386<br>099 | 0.035931 | 1.153293 | up   |        | AI175475         |
| A_44_P994<br>238 | 0.045898 | 1.592057 | down | Ogn    | NM_001106<br>103 |
| A_44_P808<br>602 | 0.043018 | 1.284134 | up   |        |                  |
| A_44_P395<br>020 | 0.013752 | 1.265276 | up   |        | AI407351         |
| A_44_P142<br>194 | 0.045149 | 1.230966 | up   |        | AY539899         |
| A_43_P175<br>65  | 0.016592 | 1.333225 | up   |        | BC092613         |
| A_44_P355<br>013 | 0.015795 | 1.257875 | up   |        | U02094           |
| A_44_P991<br>634 | 0.044709 | 1.213485 | up   |        |                  |
| A_42_P624<br>382 | 0.037537 | 1.137158 | up   | Cdipt  | NM_138899        |
| A_44_P511<br>314 | 0.029686 | 1.352948 | down | Osr1   | NM_001106<br>716 |

|                   |          |          |      |         |                  |
|-------------------|----------|----------|------|---------|------------------|
| A_44_P681<br>889  | 0.042406 | 1.306347 | up   |         | AA964497         |
| A_44_P791<br>696  | 0.013037 | 1.206142 | up   |         | DV725758         |
| A_44_P185<br>311  | 0.049587 | 1.075806 | up   |         | XM_343845        |
| A_42_P755<br>414  | 0.041617 | 1.39648  | up   |         | AW918668         |
| A_44_P359<br>278  | 0.022947 | 1.348486 | up   |         | AI176699         |
| A_44_P592<br>461  | 0.014858 | 1.203856 | up   |         | BC091283         |
| A_44_P870<br>678  | 0.023504 | 1.207091 | down |         |                  |
| A_44_P474<br>509  | 0.031613 | 1.699625 | up   |         | CO394478         |
| A_44_P329<br>756  | 0.024499 | 1.301431 | up   |         | AI059074         |
| A_44_P231<br>893  | 0.018718 | 1.18784  | up   | Fam125b | XM_342420        |
| A_44_P441<br>596  | 0.025833 | 1.428037 | up   | Rapgef2 | NM_001107<br>684 |
| A_44_P321<br>686  | 0.019776 | 1.238182 | down | Fam55c  | NM_001109<br>435 |
| A_44_P886<br>440  | 0.034842 | 1.201824 | down |         | DV722143         |
| A_44_P140<br>557  | 0.026877 | 1.16142  | up   | Dock6   | NM_001108<br>997 |
| A_44_P529<br>455  | 0.035352 | 1.583783 | up   | Gnrh1   | M15527           |
| A_44_P104<br>7375 | 0.043564 | 1.097652 | up   | Rnf10   | NM_001011<br>904 |
| A_44_P976<br>320  | 0.022888 | 1.136965 | up   |         |                  |
| A_44_P227<br>194  | 0.014439 | 1.332915 | down |         |                  |
| A_44_P555<br>935  | 0.029347 | 1.143043 | up   |         | BF419161         |
| A_44_P240<br>523  | 0.017735 | 1.189168 | up   |         | AI169232         |
| A_44_P103<br>6481 | 0.039135 | 1.377103 | up   |         | CB609784         |
| A_44_P675<br>934  | 0.030576 | 1.353982 | up   |         | BQ194543         |

|                   |          |          |      |         |                  |
|-------------------|----------|----------|------|---------|------------------|
| A_42_P598<br>733  | 0.024454 | 1.149883 | up   | Dnajc21 | NM_138856        |
| A_44_P352<br>825  | 0.047422 | 1.244729 | up   |         | AA892319         |
| A_44_P905<br>727  | 0.019133 | 1.354594 | down |         |                  |
| A_43_P158<br>74   | 0.03318  | 1.278996 | up   | Cep350  | AF287357         |
| A_44_P103<br>3521 | 0.009803 | 1.22219  | up   |         | AA875280         |
| A_44_P420<br>927  | 0.024114 | 1.218958 | down |         | XM_219401        |
| A_42_P479<br>422  | 0.038612 | 1.164545 | up   | Traf7   | NM_001127<br>548 |
| A_44_P806<br>646  | 0.00938  | 1.232793 | up   | Znf609  | NM_001173<br>371 |
| A_44_P107<br>097  | 0.046082 | 1.370313 | down | Dcps    | NM_153302        |
| A_44_P100<br>5858 | 0.032096 | 1.152889 | up   | Ube2h   | NM_001172<br>127 |
| A_44_P441<br>947  | 0.012869 | 1.074675 | down |         | DY315912         |
| A_44_P808<br>019  | 0.006335 | 1.145093 | down |         |                  |
| A_44_P231<br>955  | 0.008612 | 1.237246 | down | Rem1    | NM_001025<br>753 |
| A_43_P197<br>91   | 0.037414 | 1.12905  | up   |         | XM_002729<br>624 |
| A_43_P211<br>65   | 0.044021 | 1.309585 | down | Kpna6   | NM_001015<br>029 |
| A_44_P152<br>048  | 0.032588 | 1.296767 | up   | Irx1    | NM_001107<br>331 |
| A_44_P251<br>476  | 0.008697 | 1.434803 | up   |         | AI407309         |
| A_44_P324<br>574  | 0.017608 | 1.360964 | up   |         | AA817956         |
| A_44_P467<br>591  | 0.004446 | 1.357801 | down | Neu2    | NM_017130        |
| A_44_P282<br>567  | 0.035706 | 1.196169 | up   |         | AI060229         |
| A_44_P330<br>332  | 0.012632 | 1.319867 | up   | Prkaca  | NM_001100<br>922 |
| A_44_P459<br>893  | 0.040504 | 1.340142 | up   |         | BQ200384         |

|                   |          |          |      |          |                  |
|-------------------|----------|----------|------|----------|------------------|
| A_44_P359<br>190  | 0.048928 | 1.128858 | down | Gabpa    | NM_001108<br>841 |
| A_44_P127<br>958  | 0.004147 | 1.251344 | up   | Myo9a    | NM_134335        |
| A_44_P105<br>1765 | 0.049733 | 1.109644 | up   | Thap3    | NM_001108<br>695 |
| A_44_P332<br>429  | 0.043294 | 1.657707 | down | C1s      | NM_138900        |
| A_44_P313<br>410  | 0.046803 | 1.314227 | up   |          | AI179677         |
| A_43_P183<br>29   | 0.038663 | 1.146233 | up   | Stim1    | NM_001108<br>496 |
| A_43_P135<br>33   | 0.041579 | 1.170619 | up   |          | EV771450         |
| A_44_P452<br>868  | 0.020375 | 1.325019 | up   |          | XM_343854        |
| A_44_P187<br>238  | 0.008337 | 1.101148 | down | Rpo1-3   | NM_001037<br>787 |
| A_44_P341<br>910  | 0.018307 | 4.199264 | down | Retnlg   | NM_181625        |
| A_44_P223<br>549  | 0.015136 | 1.659863 | up   | Pdgfb    | NM_031524        |
| A_44_P103<br>1109 | 0.024606 | 1.108868 | up   | Npdc1    | NM_001004<br>231 |
| A_44_P280<br>037  | 0.018353 | 2.086409 | up   |          | AI072877         |
| A_43_P105<br>91   | 0.044255 | 1.098806 | up   | Tcea1    | NM_001025<br>735 |
| A_44_P958<br>991  | 0.037179 | 1.212974 | down |          |                  |
| A_44_P103<br>9444 | 0.021132 | 1.262843 | up   | Lasp1    | NM_032613        |
| A_42_P542<br>744  | 7.95E-04 | 1.268371 | up   | Dchs1    | NM_001107<br>544 |
| A_43_P193<br>41   | 0.029647 | 1.272032 | down |          | XM_342827        |
| A_44_P321<br>359  | 0.048812 | 1.331649 | down |          | XM_226455        |
| A_43_P110<br>98   | 0.024122 | 1.139163 | up   | Cdc42bpb | NM_053620        |
| A_44_P105<br>7903 | 0.016419 | 1.110319 | up   | Mll5     | XM_231287        |
| A_44_P183<br>979  | 0.030314 | 1.085976 | up   |          | AW141315         |

|                   |          |          |      |        |                  |
|-------------------|----------|----------|------|--------|------------------|
| A_44_P177<br>146  | 0.03604  | 1.186801 | up   |        | AI599699         |
| A_44_P751<br>956  | 0.001829 | 1.328227 | up   |        | AI599448         |
| A_44_P148<br>440  | 0.038033 | 1.092844 | up   | Arl8a  | NM_001109<br>071 |
| A_44_P242<br>601  | 0.006409 | 1.487594 | up   |        | CA505735         |
| A_44_P105<br>2324 | 0.042125 | 1.299802 | up   | Lamp3  | NM_001012<br>015 |
| A_44_P638<br>554  | 0.002687 | 1.178087 | up   |        |                  |
| A_42_P473<br>425  | 0.041716 | 1.266912 | up   | Unc13d | NM_138844        |
| A_44_P708<br>381  | 0.033703 | 2.352564 | down |        | CB315312         |
| A_43_P185<br>17   | 0.046145 | 1.165072 | up   | Baz2a  | NM_001107<br>158 |
| A_43_P108<br>43   | 0.021534 | 1.269169 | up   | Ahcyl1 | NM_001108<br>561 |
| A_44_P168<br>842  | 0.023627 | 1.150611 | down |        |                  |
| A_44_P186<br>317  | 0.008653 | 1.428521 | down | Eps8   | XM_232499        |
| A_44_P529<br>904  | 0.014814 | 1.264991 | up   | Bend7  | XM_341560        |
| A_44_P488<br>167  | 0.037252 | 1.310409 | up   |        | AA900165         |
| A_43_P111<br>72   | 0.041651 | 1.064807 | up   | Fis1   | NM_001105<br>919 |
| A_44_P869<br>077  | 0.009148 | 1.143515 | up   |        | CN541273         |
| A_44_P103<br>5802 | 0.011626 | 1.103426 | up   |        | XM_214528        |
| A_44_P207<br>350  | 0.048429 | 1.256298 | up   |        | AA999155         |
| A_44_P758<br>912  | 0.018908 | 1.105753 | up   |        | BF522863         |
| A_43_P209<br>41   | 0.008137 | 1.162425 | down | Drg1   | NM_001009<br>685 |
| A_44_P602<br>724  | 0.013569 | 1.186537 | up   |        | BF522056         |
| A_44_P413<br>997  | 0.040671 | 1.288053 | up   |        | CB578722         |

|                   |          |          |      |         |                  |
|-------------------|----------|----------|------|---------|------------------|
| A_44_P304<br>202  | 0.031343 | 1.303786 | down | Slc6a2  | NM_031343        |
| A_44_P170<br>919  | 0.042529 | 1.890068 | down | Gpr183  | NM_001109<br>386 |
| A_44_P124<br>074  | 0.00791  | 1.435542 | down |         | XM_217067        |
| A_44_P306<br>096  | 0.033885 | 1.067108 | up   | Srp9    | NM_001126<br>095 |
| A_44_P435<br>059  | 0.020484 | 1.22213  | down | Hmgb3   | NM_001173<br>341 |
| A_43_P119<br>08   | 0.016585 | 1.31624  | up   | Sema3a  | NM_017310        |
| A_44_P226<br>941  | 0.043327 | 1.78336  | down | Pln     | NM_022707        |
| A_44_P443<br>717  | 0.022894 | 1.570239 | down |         | BQ194049         |
| A_44_P325<br>522  | 0.047288 | 1.80951  | down | Lmnb1   | NM_053905        |
| A_44_P324<br>340  | 0.024922 | 1.121834 | up   | Mfsd6   | NM_001106<br>911 |
| A_42_P686<br>567  | 0.033849 | 1.108637 | up   |         |                  |
| A_44_P248<br>562  | 0.010361 | 1.269698 | down |         | XM_235784        |
| A_44_P373<br>153  | 0.03343  | 1.239988 | up   | Myo6    | XM_236444        |
| A_44_P381<br>917  | 0.021216 | 1.718454 | down | Sphk1   | NM_133386        |
| A_44_P104<br>1455 | 0.029977 | 1.13426  | up   |         | AW144006         |
| A_42_P560<br>996  | 0.035738 | 1.240169 | up   |         | XM_001061<br>864 |
| A_44_P130<br>036  | 0.003404 | 1.225107 | up   |         | AA957486         |
| A_44_P507<br>881  | 0.01825  | 1.276661 | up   |         | AI502676         |
| A_43_P166<br>97   | 0.033839 | 1.116461 | up   |         |                  |
| A_44_P590<br>627  | 0.033732 | 1.324087 | down |         |                  |
| A_44_P294<br>461  | 0.042602 | 1.880367 | up   |         | AA925221         |
| A_44_P128<br>195  | 0.026738 | 1.555056 | down | Ppp1r1b | NM_138521        |

|                   |          |          |      |               |                  |
|-------------------|----------|----------|------|---------------|------------------|
| A_44_P368<br>241  | 0.012333 | 1.540986 | down | Pola1         | NM_053479        |
| A_44_P198<br>669  | 0.025591 | 1.198207 | down | LOC50068<br>4 | NM_001047<br>959 |
| A_44_P488<br>475  | 0.010513 | 1.105609 | up   |               | XM_001073<br>009 |
| A_44_P215<br>744  | 0.012731 | 1.360995 | down | Lrrc9         | XM_001077<br>512 |
| A_44_P101<br>4700 | 0.034406 | 1.352843 | down | Cog2          | NM_001110<br>494 |
| A_44_P532<br>341  | 0.011012 | 1.47333  | down |               |                  |
| A_44_P849<br>693  | 0.025987 | 1.378856 | up   |               | AA892165         |
| A_44_P163<br>158  | 0.008875 | 1.28143  | up   |               | AI233777         |
| A_44_P104<br>8388 | 0.00702  | 1.102309 | up   | Acd           | NM_001037<br>193 |
| A_44_P529<br>562  | 0.04035  | 1.147718 | down | Slc30a1       | NM_022853        |
| A_43_P199<br>39   | 0.034774 | 1.228182 | up   |               |                  |
| A_44_P683<br>133  | 0.011893 | 1.499653 | down |               |                  |
| A_44_P634<br>724  | 0.033131 | 1.208261 | down |               | AW143399         |
| A_44_P284<br>859  | 0.048198 | 1.12434  | up   | Htatsf1       | NM_001108<br>259 |
| A_44_P219<br>788  | 0.047978 | 1.125986 | up   | Surf2         | NM_001033<br>866 |
| A_44_P158<br>135  | 0.013527 | 1.410068 | up   |               | BG378050         |
| A_43_P180<br>11   | 0.034564 | 1.198112 | up   | Stam2         | NM_001012<br>085 |
| A_44_P311<br>955  | 0.041026 | 1.185443 | up   | Prkce         | NM_017171        |
| A_44_P132<br>815  | 0.019462 | 1.281012 | up   |               | AY148302         |
| A_44_P543<br>753  | 0.042471 | 1.249235 | down |               |                  |
| A_43_P155<br>12   | 0.038779 | 1.256404 | up   | Tpra1         | NM_053534        |
| A_44_P459<br>052  | 0.01412  | 2.401578 | down | Slc28a2       | U67084           |

|                   |          |          |      |                  |                  |
|-------------------|----------|----------|------|------------------|------------------|
| A_44_P680<br>369  | 0.046078 | 1.533396 | up   |                  | BF545930         |
| A_44_P101<br>9245 | 0.031642 | 1.200546 | up   | Zmat3            | NM_022548        |
| A_44_P699<br>916  | 8.23E-04 | 1.3024   | up   |                  |                  |
| A_44_P135<br>641  | 0.039732 | 1.416365 | down | Rapsn            | NM_001108<br>584 |
| A_44_P715<br>835  | 0.03767  | 1.206588 | down |                  |                  |
| A_44_P356<br>014  | 0.024431 | 1.190459 | down | Cog6             | NM_001004<br>262 |
| A_44_P265<br>466  | 0.030985 | 1.317102 | up   |                  | AA875232         |
| A_44_P371<br>552  | 0.040351 | 1.076203 | down | Pcbp2            | NM_001013<br>223 |
| A_44_P622<br>091  | 0.018816 | 1.210245 | up   | Ppm1f            | BC166854         |
| A_44_P245<br>019  | 0.0163   | 1.511259 | up   |                  | AW143927         |
| A_44_P418<br>233  | 0.012623 | 1.240249 | up   |                  | AI555458         |
| A_44_P240<br>881  | 0.013174 | 1.657648 | down | Art3             | NM_001012<br>034 |
| A_44_P211<br>111  | 0.022437 | 1.225344 | down |                  | XM_236367        |
| A_44_P915<br>344  | 0.012968 | 2.959552 | down | Emx2             | NM_001109<br>169 |
| A_44_P242<br>499  | 0.041348 | 1.4752   | up   |                  | BE118080         |
| A_44_P542<br>933  | 0.02592  | 1.223364 | up   | Zfp3611          | NM_017172        |
| A_44_P103<br>3739 | 0.043968 | 1.138107 | up   | Akap11           | NM_012773        |
| A_42_P610<br>788  | 0.032006 | 1.210844 | down | Ampd3            | NM_031544        |
| A_44_P235<br>028  | 0.006159 | 1.434468 | down |                  | AI101484         |
| A_44_P234<br>460  | 0.01801  | 1.304975 | up   |                  | XM_216715        |
| A_44_P313<br>898  | 0.04481  | 1.208227 | down | LOC10036<br>4026 | XM_002725<br>617 |
| A_44_P480<br>749  | 0.044217 | 1.282065 | down | Wbscr22          | NM_001135<br>743 |



|                  |          |          |      |           |                  |
|------------------|----------|----------|------|-----------|------------------|
| A_44_P970<br>110 | 0.037819 | 1.37869  | up   |           | AW253396         |
| A_44_P610<br>377 | 0.020586 | 1.302869 | up   |           |                  |
| A_44_P313<br>283 | 0.020601 | 1.17613  | up   | Capn2     | NM_017116        |
| A_44_P270<br>700 | 0.048468 | 1.345045 | down |           | BG663460         |
| A_44_P548<br>730 | 0.040144 | 1.256575 | up   | Bcl9l     | NM_001106<br>817 |
| A_42_P537<br>501 | 0.033656 | 1.273874 | up   | Dpp4      | NM_012789        |
| A_44_P297<br>840 | 0.045532 | 1.310807 | down |           | XM_343376        |
| A_44_P457<br>362 | 0.04411  | 1.256892 | up   | Col16a1   | NM_001015<br>033 |
| A_44_P201<br>558 | 0.049745 | 1.312197 | up   |           | XM_230607        |
| A_44_P775<br>982 | 0.003852 | 1.241999 | down | Armc9     | NM_001109<br>663 |
| A_44_P262<br>677 | 0.043274 | 1.239155 | down | Hist2h3c2 | NM_001107<br>698 |
| A_44_P495<br>236 | 0.007119 | 1.31329  | up   |           | AI176723         |
| A_44_P225<br>691 | 0.006705 | 1.166687 | up   | Znf142    | NM_001108<br>225 |
| A_44_P669<br>819 | 0.033521 | 1.522143 | up   |           |                  |
| A_42_P640<br>923 | 0.01922  | 1.348801 | down | Cflar     | NM_057138        |
| A_44_P982<br>956 | 0.017433 | 1.44113  | up   |           |                  |
| A_44_P643<br>268 | 0.014702 | 1.184337 | up   | Glt8d3    | NM_001100<br>887 |
| A_43_P172<br>35  | 0.040006 | 1.112483 | up   |           |                  |
| A_42_P771<br>346 | 0.026901 | 1.238068 | up   | Acvr11    | NM_022441        |
| A_44_P201<br>537 | 0.019304 | 1.149883 | up   |           | AY724487         |
| A_44_P426<br>578 | 2.48E-04 | 1.447792 | down |           |                  |
| A_44_P149<br>789 | 0.027309 | 1.153521 | up   |           | XM_215921        |

|                   |          |          |      |               |                  |
|-------------------|----------|----------|------|---------------|------------------|
| A_44_P267<br>993  | 0.019799 | 1.279736 | down |               | BC158695         |
| A_42_P459<br>349  | 0.004231 | 1.164559 | down | Sgk493        | NM_001108<br>007 |
| A_44_P109<br>998  | 0.018425 | 1.193152 | up   |               | XM_227287        |
| A_44_P225<br>566  | 0.012234 | 1.115832 | up   | Cask          | NM_022184        |
| A_43_P122<br>43   | 0.04155  | 1.170654 | down | Prdx3         | NM_022540        |
| A_44_P121<br>430  | 0.042668 | 1.246309 | up   | Peg12         | NM_001170<br>562 |
| A_44_P205<br>476  | 0.034889 | 1.134563 | up   |               | BI302853         |
| A_44_P807<br>394  | 0.008951 | 1.253951 | up   |               |                  |
| A_44_P238<br>424  | 0.021864 | 1.409362 | up   | Akap5         | NM_133515        |
| A_44_P106<br>923  | 0.031682 | 1.110906 | down | Sp1           | NM_012655        |
| A_44_P984<br>158  | 0.026985 | 1.321781 | down | LOC69175<br>9 | BI291259         |
| A_44_P225<br>378  | 0.035829 | 1.621462 | up   |               | AA945587         |
| A_42_P805<br>179  | 0.031558 | 1.091818 | up   |               | CF110294         |
| A_44_P546<br>866  | 0.036488 | 1.459044 | up   |               | BF391339         |
| A_44_P146<br>123  | 0.028666 | 1.115947 | up   |               | AA892855         |
| A_44_P225<br>323  | 0.035852 | 1.662732 | up   |               |                  |
| A_44_P365<br>611  | 0.027326 | 1.31169  | down | Gpr31         | NM_001169<br>132 |
| A_44_P808<br>189  | 0.02357  | 1.170997 | up   |               |                  |
| A_43_P152<br>45   | 0.018662 | 1.19942  | up   | Npr1          | NM_012613        |
| A_44_P152<br>521  | 0.018002 | 1.223865 | up   |               | BG373526         |
| A_44_P345<br>207  | 0.004474 | 1.205105 | up   |               | BI295182         |
| A_44_P105<br>7955 | 0.026573 | 1.206246 | down | Cd164         | NM_031812        |

|                  |          |          |      |          |                  |
|------------------|----------|----------|------|----------|------------------|
| A_44_P434<br>844 | 0.019008 | 1.261051 | down | Rqcd1    | NM_001009<br>357 |
| A_44_P432<br>826 | 0.009217 | 1.258325 | up   | Rap1gds1 | NM_001107<br>728 |
| A_44_P715<br>686 | 0.017768 | 1.232201 | up   |          |                  |
| A_43_P166<br>36  | 0.038072 | 1.159284 | down | Dhdds    | NM_001011<br>978 |
| A_44_P310<br>632 | 0.002378 | 1.498553 | up   |          | AI231342         |
| A_44_P523<br>000 | 0.015206 | 1.904325 | down |          | XM_001080<br>361 |
| A_44_P179<br>474 | 0.048223 | 1.162456 | up   |          | AI232477         |
| A_43_P100<br>49  | 0.003856 | 1.203839 | up   | Tm2d2    | NM_001017<br>444 |
| A_44_P897<br>620 | 0.023268 | 1.183295 | up   |          | BQ781487         |
| A_44_P913<br>155 | 0.040379 | 1.213866 | up   |          | AW915016         |
| A_44_P235<br>217 | 0.010441 | 1.273439 | up   |          | AI228247         |
| A_44_P637<br>792 | 0.022099 | 1.141869 | down | Cbfb     | NM_001013<br>191 |
| A_44_P328<br>758 | 0.029061 | 1.211226 | down | Acpl2    | NM_001007<br>710 |
| A_42_P806<br>077 | 0.043046 | 1.244947 | up   |          | AW532188         |
| A_43_P141<br>79  | 0.009266 | 1.132862 | up   | Ap2m1    | NM_053837        |
| A_44_P414<br>469 | 0.043988 | 1.315296 | up   | Hadha    | NM_130826        |
| A_44_P754<br>744 | 0.02864  | 1.397172 | up   |          |                  |
| A_44_P446<br>944 | 0.038402 | 1.488118 | up   |          | AI136427         |
| A_44_P237<br>578 | 0.010357 | 1.213037 | up   |          | XM_344763        |
| A_44_P313<br>652 | 0.013555 | 1.571368 | down | RT1-EC2  | M10094           |
| A_44_P888<br>644 | 0.041368 | 1.627679 | up   |          |                  |
| A_44_P141<br>767 | 0.003045 | 1.333853 | up   | Tox3     | NM_001106<br>171 |

|                   |          |          |      |                |                  |
|-------------------|----------|----------|------|----------------|------------------|
| A_43_P150<br>22   | 0.044336 | 1.258563 | down |                | AW916092         |
| A_44_P105<br>7403 | 0.026061 | 1.167073 | up   |                | BF396321         |
| A_44_P469<br>883  | 0.03933  | 1.249965 | up   |                | BI285137         |
| A_44_P853<br>775  | 0.008572 | 1.308479 | down | LOC69122<br>1  | XM_001077<br>260 |
| A_44_P222<br>030  | 0.017615 | 1.307493 | up   | Tbx3           | NM_181638        |
| A_44_P826<br>742  | 0.017748 | 1.39047  | down |                |                  |
| A_44_P308<br>479  | 0.036927 | 1.439282 | up   |                | AA997228         |
| A_44_P538<br>012  | 0.029349 | 1.112448 | down |                | BG672309         |
| A_42_P478<br>500  | 0.035675 | 1.099659 | down | Slc22a17       | NM_177421        |
| A_44_P404<br>824  | 0.036062 | 1.141559 | up   | Map1lc3a       | NM_199500        |
| A_44_P381<br>822  | 0.042308 | 1.30157  | down |                | L34821           |
| A_44_P820<br>981  | 0.048962 | 1.605171 | down |                | AW920863         |
| A_44_P606<br>290  | 0.035502 | 1.210087 | down |                |                  |
| A_44_P105<br>634  | 0.014929 | 1.299008 | down | RGD13593<br>78 | NM_001007<br>658 |
| A_44_P838<br>611  | 0.048214 | 1.215214 | up   |                |                  |
| A_44_P147<br>426  | 0.020311 | 1.199414 | down | Nt5dc1         | NM_001106<br>393 |
| A_44_P483<br>514  | 0.019003 | 1.323586 | up   |                | AA944197         |
| A_44_P239<br>368  | 0.035631 | 1.212969 | down |                | BG901182         |
| A_44_P207<br>346  | 0.003007 | 1.209404 | up   |                | AA901241         |
| A_44_P367<br>798  | 0.041434 | 1.116637 | up   | Ipmk           | NM_134417        |
| A_44_P897<br>008  | 0.002649 | 1.420289 | up   | Irgq           | NM_001135<br>742 |
| A_44_P175<br>954  | 0.045716 | 1.239128 | down | Slc25a5        | NM_057102        |

|                   |          |          |      |                |                  |
|-------------------|----------|----------|------|----------------|------------------|
| A_44_P522<br>080  | 0.038893 | 1.174388 | up   | Higd2a         | BI278481         |
| A_44_P302<br>265  | 0.045107 | 1.459028 | down | Pfn3           | NM_001109<br>487 |
| A_44_P344<br>340  | 0.024087 | 1.206889 | up   | Zfoc1          | U78135           |
| A_44_P384<br>404  | 0.028853 | 1.79359  | down | Ms4a11         | XM_342028        |
| A_44_P439<br>033  | 0.033079 | 1.196567 | down |                | BF282476         |
| A_44_P102<br>8918 | 0.020172 | 1.131081 | up   |                | AA996422         |
| A_44_P478<br>591  | 0.004198 | 1.317797 | up   | LOC68679<br>1  | XM_001064<br>525 |
| A_43_P154<br>44   | 0.003775 | 1.361597 | down | Smo            | NM_012807        |
| A_44_P274<br>083  | 0.019229 | 1.184995 | down | Aqp11          | NM_173105        |
| A_44_P464<br>656  | 0.017359 | 1.21095  | down |                | BF282271         |
| A_44_P300<br>348  | 0.017385 | 1.254617 | up   |                | AI012336         |
| A_44_P438<br>641  | 0.020008 | 1.110257 | down | LOC30030<br>3  | XM_213108        |
| A_44_P135<br>845  | 4.61E-04 | 1.229249 | down | Tecpr2         | XM_234543        |
| A_44_P379<br>976  | 0.013723 | 1.245758 | up   | Lrrc8a         | NM_001024<br>782 |
| A_44_P293<br>480  | 0.046166 | 1.252482 | up   |                | AI012480         |
| A_44_P321<br>043  | 0.021879 | 1.642173 | down | RGD15617<br>59 | XM_217910        |
| A_44_P484<br>779  | 0.001544 | 1.293963 | up   | Utrn           | NM_013070        |
| A_44_P441<br>221  | 0.006053 | 1.331322 | up   |                | XM_236909        |
| A_44_P469<br>357  | 0.023447 | 1.066839 | down | RGD15658<br>40 | NM_001168<br>523 |
| A_44_P375<br>339  | 0.033977 | 1.597704 | down | Ptk6           | NM_001108<br>968 |
| A_44_P973<br>681  | 0.045539 | 1.535756 | down |                | AW141066         |
| A_44_P993<br>914  | 0.026876 | 1.306178 | up   | Pdia5          | NM_001014<br>125 |

|                   |          |          |      |               |                  |
|-------------------|----------|----------|------|---------------|------------------|
| A_44_P623<br>197  | 0.019613 | 1.598911 | up   | Mast4         | XM_226732        |
| A_44_P929<br>254  | 0.029926 | 1.153564 | down |               |                  |
| A_44_P658<br>658  | 0.030584 | 1.213088 | up   |               | BF390608         |
| A_44_P142<br>944  | 0.042284 | 1.528525 | up   |               | AA925384         |
| A_44_P148<br>560  | 0.039894 | 1.25719  | up   |               | AW143690         |
| A_43_P210<br>84   | 0.046527 | 1.240212 | up   | Pex26         | NM_001106<br>618 |
| A_44_P947<br>936  | 0.037611 | 1.131479 | down |               |                  |
| A_44_P277<br>340  | 0.045732 | 1.187778 | up   | Megf9         | NM_001107<br>940 |
| A_43_P132<br>21   | 0.02385  | 1.108166 | up   | Ppp6c         | NM_133589        |
| A_44_P137<br>978  | 0.046864 | 1.121028 | up   | Rbbp8         | NM_001134<br>417 |
| A_44_P391<br>068  | 0.03382  | 1.618185 | down | Gstm3         | NM_020540        |
| A_44_P149<br>743  | 0.016418 | 1.368516 | up   | Sema6a        | NM_001108<br>430 |
| A_44_P312<br>877  | 0.037036 | 1.316796 | up   |               | BF420507         |
| A_44_P867<br>229  | 0.038771 | 1.344957 | up   |               | AW915047         |
| A_44_P365<br>114  | 0.038497 | 1.191804 | up   |               | AI232346         |
| A_44_P696<br>462  | 0.006568 | 1.276864 | up   |               | AA957996         |
| A_44_P549<br>724  | 0.03557  | 1.52737  | up   |               | AW919937         |
| A_44_P103<br>6480 | 0.046727 | 1.330811 | up   |               | XR_006927        |
| A_44_P328<br>283  | 0.036006 | 1.407707 | down | Mtmr15        | XM_219706        |
| A_42_P472<br>077  | 0.010364 | 1.427832 | up   |               | AW140877         |
| A_43_P183<br>45   | 0.024667 | 1.219309 | up   | LOC68453<br>4 | XM_001070<br>862 |
| A_44_P788<br>211  | 0.028154 | 1.115416 | down | Sft2d2        | NM_001034<br>011 |

|                   |          |          |      |         |                  |
|-------------------|----------|----------|------|---------|------------------|
| A_44_P318<br>932  | 0.042015 | 1.121676 | down |         | XM_231081        |
| A_44_P667<br>917  | 0.030751 | 1.094067 | down |         |                  |
| A_44_P438<br>613  | 0.010219 | 1.321634 | down | Aifm2   | NM_001139<br>483 |
| A_42_P522<br>562  | 0.043451 | 1.109186 | up   |         | EV767388         |
| A_44_P700<br>241  | 0.028657 | 1.166784 | up   | Usp46   | XM_214034        |
| A_44_P446<br>556  | 0.041387 | 1.200999 | up   | Macf1   | NM_001135<br>758 |
| A_44_P186<br>914  | 0.036442 | 1.606986 | down | Ggt5    | NM_019235        |
| A_44_P230<br>259  | 0.006501 | 2.130912 | up   |         | BE111654         |
| A_42_P456<br>155  | 0.017534 | 1.125709 | up   | Uqcr    | NM_001126<br>097 |
| A_44_P988<br>589  | 0.007841 | 1.509806 | up   |         | AI176031         |
| A_43_P176<br>99   | 0.030192 | 1.197564 | down | Fbxl5   | NM_001107<br>222 |
| A_44_P221<br>077  | 0.016587 | 1.698258 | up   | Tmem100 | NM_001017<br>479 |
| A_43_P199<br>99   | 0.048348 | 3.449622 | up   | Fcrls   | NM_001107<br>702 |
| A_44_P436<br>628  | 0.044877 | 1.21084  | up   |         | AI176323         |
| A_44_P143<br>541  | 0.008844 | 1.152427 | up   | Lrrfip2 | NM_001024<br>761 |
| A_44_P588<br>967  | 0.029687 | 1.384479 | up   |         | AI008244         |
| A_44_P240<br>088  | 0.015668 | 1.233813 | up   |         | AI175366         |
| A_44_P255<br>625  | 0.002044 | 1.270465 | down |         |                  |
| A_44_P105<br>2067 | 0.033846 | 1.196168 | down | Plekha4 | NM_199101        |
| A_44_P238<br>693  | 0.00546  | 1.222671 | up   | Nav2    | NM_138529        |
| A_44_P242<br>774  | 0.035963 | 1.342378 | up   |         | AI230406         |
| A_44_P139<br>694  | 0.00644  | 1.178418 | up   | Tnfaip1 | NM_182950        |

|                   |          |          |      |               |                  |
|-------------------|----------|----------|------|---------------|------------------|
| A_42_P577<br>560  | 0.047738 | 1.531511 | down | Tinagl1       | NM_053582        |
| A_44_P902<br>385  | 0.035213 | 1.070234 | down |               |                  |
| A_44_P101<br>2748 | 0.046175 | 1.147979 | up   | Plscr3        | NM_001012<br>139 |
| A_44_P910<br>739  | 0.045085 | 1.188063 | up   |               | DY472814         |
| A_44_P508<br>264  | 0.043951 | 1.156938 | up   | Cdkn1b        | NM_031762        |
| A_44_P778<br>851  | 0.00893  | 1.786552 | down |               |                  |
| A_44_P320<br>500  | 0.007451 | 1.392875 | up   |               | AW252169         |
| A_44_P182<br>934  | 0.044948 | 1.195256 | up   | Rpl35a        | NM_021264        |
| A_44_P284<br>220  | 0.049194 | 1.39059  | up   |               | XM_001071<br>742 |
| A_43_P151<br>17   | 0.026282 | 1.395186 | up   |               | BF556558         |
| A_44_P619<br>218  | 0.003075 | 1.175404 | up   |               | BF548909         |
| A_44_P188<br>995  | 0.02548  | 1.323298 | up   |               | AI409460         |
| A_42_P549<br>942  | 0.048081 | 1.417653 | down | Fbn2          | NM_031826        |
| A_44_P297<br>420  | 0.03006  | 1.450199 | down |               | XM_219327        |
| A_42_P729<br>693  | 0.029162 | 1.142603 | up   | Synj2bp       | NM_022599        |
| A_44_P336<br>489  | 0.048146 | 1.070346 | down | Txndc13       | NM_001100<br>529 |
| A_42_P722<br>862  | 0.027002 | 1.275158 | up   | Selm          | NM_001115<br>013 |
| A_44_P365<br>947  | 0.02739  | 1.197575 | down | LOC60629<br>4 | NM_001031<br>627 |
| A_44_P189<br>785  | 0.043948 | 1.274385 | down | Ap3b1         | NM_001107<br>646 |
| A_44_P101<br>7079 | 0.026864 | 1.067024 | up   | Rnaseh1       | NM_001013<br>097 |
| A_44_P649<br>412  | 0.048877 | 1.228144 | up   |               | AI011243         |
| A_44_P164<br>120  | 0.035118 | 1.268456 | down | Gtf3c3        | NM_001108<br>239 |



|                  |          |          |      |                |                  |
|------------------|----------|----------|------|----------------|------------------|
| A_42_P566<br>906 | 0.018633 | 1.136386 | down | Peci           | NM_001006<br>966 |
| A_43_P202<br>05  | 0.020803 | 1.237562 | up   | Ldb2           | NM_001106<br>009 |
| A_44_P173<br>218 | 0.012247 | 1.296256 | up   | Rapgef2        | NM_001107<br>684 |
| A_44_P438<br>627 | 0.029149 | 1.223213 | down |                | XM_233310        |
| A_44_P409<br>913 | 0.037829 | 1.24418  | down |                | XM_341043        |
| A_42_P737<br>542 | 0.002005 | 1.170452 | down | Fam98b         | XM_575208        |
| A_43_P115<br>58  | 0.009498 | 1.873359 | down | Apod           | NM_012777        |
| A_44_P603<br>427 | 0.014342 | 1.23423  | down |                | BC090004         |
| A_44_P550<br>662 | 0.029941 | 1.753212 | down | Ms4a6a         | XM_215145        |
| A_42_P715<br>210 | 0.039706 | 1.173632 | down | RGD15647<br>09 | NM_001107<br>205 |
| A_44_P323<br>550 | 0.012049 | 1.443374 | down | Atp5sl         | NM_001009<br>705 |
| A_44_P294<br>138 | 0.010437 | 1.608799 | up   |                | AI230985         |
| A_44_P362<br>343 | 0.031199 | 1.253672 | up   |                | AA859680         |
| A_44_P499<br>075 | 0.0307   | 1.388426 | down |                |                  |
| A_44_P299<br>293 | 0.037607 | 1.479105 | down | Skap1          | NM_173311        |
| A_43_P174<br>08  | 0.02755  | 1.264902 | up   |                | CB547962         |
| A_43_P116<br>22  | 0.034236 | 1.109208 | down | Cd59           | NM_012925        |
| A_44_P154<br>182 | 0.039225 | 2.505205 | down | Cyp2s1         | NM_001107<br>495 |
| A_44_P227<br>010 | 0.015319 | 1.54505  | down | Tmem224        | NM_001107<br>476 |
| A_43_P195<br>05  | 0.042481 | 1.261558 | down | Agfg2          | NM_001107<br>131 |
| A_44_P163<br>159 | 0.00674  | 1.373998 | up   |                | AA924792         |
| A_44_P945<br>248 | 0.017635 | 1.18666  | up   |                |                  |

|                   |          |          |      |        |                  |
|-------------------|----------|----------|------|--------|------------------|
| A_44_P360<br>772  | 0.008402 | 1.468392 | down | Tagln  | NM_031549        |
| A_44_P390<br>265  | 0.036605 | 1.206063 | up   |        | AA858718         |
| A_44_P635<br>239  | 0.005192 | 1.936365 | up   | Nrep   | AY724475         |
| A_44_P489<br>729  | 0.047484 | 1.181375 | down |        | XM_223019        |
| A_44_P136<br>707  | 0.036697 | 1.149772 | up   |        | BG664788         |
| A_44_P464<br>027  | 0.035339 | 1.126198 | down |        | XM_226645        |
| A_42_P535<br>555  | 0.005863 | 1.141544 | up   | Papd5  | NM_001107<br>416 |
| A_44_P340<br>448  | 0.018954 | 1.088224 | up   | Usp7   | NM_001024<br>790 |
| A_44_P185<br>673  | 0.011355 | 1.33438  | up   |        | BE115614         |
| A_44_P382<br>279  | 0.020061 | 1.126869 | down | Socs6  | XM_001063<br>512 |
| A_43_P171<br>27   | 0.009836 | 1.427879 | down |        | XM_221100        |
| A_44_P296<br>819  | 0.041964 | 1.253755 | up   |        | BE106940         |
| A_44_P905<br>980  | 0.031274 | 1.20279  | up   |        | AI178326         |
| A_44_P838<br>436  | 0.038244 | 1.331572 | up   |        |                  |
| A_44_P593<br>898  | 0.022071 | 1.589098 | up   |        |                  |
| A_44_P347<br>174  | 0.049397 | 1.144835 | up   | Cecr5  | NM_001107<br>884 |
| A_44_P561<br>679  | 0.013403 | 1.125332 | up   |        |                  |
| A_43_P126<br>92   | 0.03204  | 1.327556 | up   | Git1   | NM_031814        |
| A_43_P162<br>50   | 0.042542 | 1.287881 | up   | Col4a3 | NM_001135<br>759 |
| A_44_P576<br>312  | 0.016706 | 1.161632 | up   |        |                  |
| A_44_P103<br>4201 | 0.03735  | 1.201635 | up   | Lamb3  | NM_001100<br>841 |
| A_44_P273<br>291  | 0.03163  | 1.109186 | up   |        | AW519820         |

|                  |          |          |      |                |                  |
|------------------|----------|----------|------|----------------|------------------|
| A_44_P452<br>062 | 0.024922 | 2.116971 | down | Olr48          | NM_001000<br>122 |
| A_44_P192<br>876 | 0.03764  | 1.261184 | up   |                | BI274340         |
| A_44_P113<br>403 | 0.021504 | 1.200024 | up   |                | BF555514         |
| A_44_P226<br>928 | 0.009698 | 1.35339  | up   | Pdzd2          | NM_022940        |
| A_44_P806<br>809 | 0.011002 | 1.336842 | down | Sh3bgrl        | NM_001173<br>339 |
| A_44_P325<br>808 | 0.042969 | 1.164464 | up   | Optn           | NM_145081        |
| A_44_P513<br>251 | 0.049184 | 1.286316 | down |                | XM_222985        |
| A_44_P496<br>026 | 0.031831 | 1.168609 | up   | Eml4           | NM_001108<br>008 |
| A_44_P974<br>940 | 0.038758 | 3.303    | down | RGD15623<br>92 | XM_346007        |
| A_44_P731<br>839 | 0.03517  | 1.205535 | up   |                |                  |
| A_42_P585<br>119 | 0.029099 | 1.205528 | up   | RGD73502<br>9  | NM_199493        |
| A_44_P965<br>236 | 0.027945 | 1.224246 | up   |                |                  |
| A_43_P112<br>01  | 0.00776  | 1.115381 | up   | Rmnd5b         | NM_001017<br>473 |
| A_44_P549<br>011 | 0.016704 | 1.32156  | up   | Apba2          | NM_031780        |
| A_44_P443<br>030 | 0.04693  | 1.169262 | up   | 11-Sep         | NM_001107<br>208 |
| A_44_P234<br>815 | 0.030799 | 1.1607   | up   |                | BG672591         |
| A_44_P263<br>812 | 0.03575  | 1.179661 | up   |                | AA851658         |
| A_44_P620<br>763 | 0.04936  | 1.105795 | up   |                | AI175871         |
| A_44_P381<br>343 | 0.007006 | 1.684606 | up   |                | AI103156         |
| A_44_P163<br>176 | 0.049632 | 1.103037 | up   | Tor1aip2       | NM_199100        |
| A_44_P464<br>812 | 0.034354 | 1.794409 | up   | Epha4          | NM_001162<br>411 |
| A_44_P114<br>589 | 0.018    | 1.138124 | up   | Znf821         | BC158722         |

|                  |          |          |      |          |                  |
|------------------|----------|----------|------|----------|------------------|
| A_44_P792<br>495 | 0.032279 | 1.092618 | up   |          |                  |
| A_44_P190<br>838 | 0.036791 | 1.324021 | up   | Fat4     | XM_227060        |
| A_44_P529<br>682 | 0.004783 | 1.343546 | up   | Chit1    | NM_001079<br>689 |
| A_44_P531<br>178 | 0.045761 | 1.090698 | up   |          | AI171952         |
| A_44_P536<br>365 | 0.030756 | 1.337926 | up   | Nbr1     | NM_001024<br>765 |
| A_43_P135<br>81  | 0.006145 | 1.186595 | up   |          | CB547833         |
| A_44_P542<br>308 | 0.011739 | 1.684081 | up   |          | AW523747         |
| A_44_P144<br>871 | 0.030773 | 1.259477 | down | Coq4     | NM_001031<br>662 |
| A_44_P196<br>805 | 0.027662 | 1.259117 | down | Golga7   | NM_001007<br>731 |
| A_44_P374<br>097 | 0.02373  | 1.370786 | up   |          | BI293584         |
| A_44_P196<br>984 | 0.032117 | 1.177789 | down | Fktn     | NM_001108<br>667 |
| A_44_P218<br>781 | 0.01476  | 1.346438 | up   |          | BF548818         |
| A_44_P314<br>492 | 0.024639 | 1.433339 | down | Tiam1    | NM_001100<br>558 |
| A_44_P495<br>055 | 0.018941 | 1.359449 | up   |          | BM387285         |
| A_42_P810<br>736 | 0.028001 | 1.206081 | up   | Timeless | NM_031340        |
| A_44_P314<br>260 | 0.019818 | 2.296701 | up   |          |                  |
| A_44_P421<br>226 | 0.039974 | 1.745291 | up   |          | AI101521         |
| A_44_P975<br>347 | 0.004748 | 1.393299 | down |          |                  |
| A_44_P381<br>342 | 0.02456  | 1.524935 | up   |          | AI170757         |
| A_44_P481<br>013 | 0.040262 | 1.295204 | up   |          | AI230230         |
| A_44_P424<br>825 | 0.014042 | 1.092358 | down |          | BQ198825         |
| A_44_P288<br>091 | 0.003896 | 6.259776 | up   | P2rx2    | NM_053656        |

|                   |          |          |      |               |                  |
|-------------------|----------|----------|------|---------------|------------------|
| A_44_P837<br>980  | 0.001145 | 1.283066 | up   |               |                  |
| A_44_P542<br>081  | 0.042684 | 1.534273 | down |               | AI169627         |
| A_44_P993<br>660  | 0.016365 | 1.159194 | up   |               | BG666613         |
| A_44_P135<br>525  | 0.032066 | 2.390875 | down |               | L20987           |
| A_42_P515<br>028  | 0.035449 | 1.847522 | down | Alpk2         | XM_574162        |
| A_44_P263<br>186  | 0.041951 | 1.273131 | up   |               | AI070126         |
| A_44_P560<br>884  | 0.037249 | 1.191042 | up   |               |                  |
| A_44_P895<br>829  | 0.009469 | 1.389832 | up   |               | AI043705         |
| A_44_P313<br>918  | 0.018382 | 1.231884 | down | Wdr42a        | NM_001014<br>231 |
| A_44_P622<br>593  | 0.025278 | 1.188398 | up   | Gspt1         | NM_001003<br>978 |
| A_44_P561<br>760  | 0.001913 | 1.268022 | down |               |                  |
| A_44_P413<br>534  | 0.044808 | 1.17629  | up   |               | AA997113         |
| A_44_P175<br>846  | 0.042486 | 1.428785 | up   | LOC30767<br>1 | XM_226278        |
| A_44_P273<br>796  | 0.038875 | 1.176022 | down | Zfp472        | NM_182823        |
| A_44_P276<br>106  | 0.031499 | 1.103139 | up   | Apc           | NM_012499        |
| A_44_P629<br>897  | 0.02549  | 1.287127 | up   |               | BF552300         |
| A_44_P490<br>490  | 0.043744 | 1.234653 | up   |               | AI044674         |
| A_43_P129<br>72   | 0.01665  | 1.391984 | up   | Sdc3          | NM_053893        |
| A_44_P849<br>277  | 0.023231 | 1.392299 | up   |               | AI137972         |
| A_44_P102<br>5918 | 0.026665 | 1.173672 | up   | Vwf           | XM_342759        |
| A_44_P868<br>315  | 0.028784 | 1.076755 | down | Hnrnpa3       | NM_001111<br>294 |
| A_43_P108<br>67   | 0.029389 | 1.447329 | down |               | CB547678         |

|                   |          |          |      |        |                  |
|-------------------|----------|----------|------|--------|------------------|
| A_43_P101<br>39   | 0.036957 | 1.137392 | up   |        | CB547604         |
| A_44_P712<br>688  | 0.00281  | 1.295335 | down | Trim14 | NM_001107<br>934 |
| A_44_P755<br>663  | 0.017961 | 1.225285 | down |        |                  |
| A_43_P219<br>76   | 0.044109 | 1.147598 | up   | N4bp2  | XM_223405        |
| A_44_P207<br>260  | 0.038018 | 1.259486 | down |        | AA875489         |
| A_44_P287<br>602  | 0.024665 | 1.223101 | up   |        | AA800053         |
| A_44_P348<br>435  | 0.049291 | 1.272092 | up   |        | AW915757         |
| A_44_P138<br>126  | 0.003903 | 1.321892 | down | Enox2  | XM_229131        |
| A_44_P554<br>332  | 0.03821  | 1.09543  | down | Cycs   | NM_012839        |
| A_43_P141<br>99   | 0.016496 | 1.200591 | up   |        |                  |
| A_44_P519<br>620  | 0.022409 | 1.223982 | down | Litaf  | NM_001105<br>735 |
| A_44_P372<br>718  | 0.043813 | 1.128909 | down |        |                  |
| A_44_P358<br>384  | 0.044471 | 1.14376  | up   | Dlat   | NM_031025        |
| A_44_P526<br>357  | 0.033469 | 1.234729 | up   |        | AI179356         |
| A_44_P459<br>144  | 0.009707 | 1.625128 | down | Inhba  | NM_017128        |
| A_44_P404<br>836  | 0.03055  | 1.506894 | down | Cp     | NM_012532        |
| A_44_P763<br>879  | 0.048325 | 1.216963 | up   |        |                  |
| A_44_P246<br>452  | 0.007447 | 1.279529 | up   |        | CB545779         |
| A_44_P370<br>345  | 9.18E-04 | 1.330957 | up   | Aftph  | XM_223651        |
| A_44_P101<br>1315 | 0.026026 | 1.369968 | up   | Rgs7   | NM_019343        |
| A_44_P280<br>062  | 0.043702 | 1.278589 | up   |        | CO399725         |
| A_44_P525<br>817  | 0.047355 | 1.089584 | up   | Brd4   | NM_001100<br>903 |

|                   |          |          |      |                |                  |
|-------------------|----------|----------|------|----------------|------------------|
| A_43_P128<br>64   | 0.039964 | 1.288142 | down | Pgf            | NM_053595        |
| A_44_P101<br>7315 | 0.038612 | 1.08177  | up   | Vhl            | NM_052801        |
| A_42_P460<br>758  | 0.042828 | 1.360862 | down |                | BF412134         |
| A_42_P781<br>585  | 0.009859 | 1.846228 | down | Bex4           | NM_001037<br>554 |
| A_44_P111<br>197  | 0.023539 | 1.276181 | down |                | AI044643         |
| A_44_P513<br>059  | 0.047603 | 1.681604 | down | Sfrp1          | AF167308         |
| A_44_P435<br>320  | 0.020704 | 1.226859 | up   |                | AA851161         |
| A_44_P994<br>293  | 0.004052 | 1.16614  | down |                | L07578           |
| A_44_P527<br>985  | 0.047391 | 1.285555 | down |                | BQ782789         |
| A_44_P792<br>507  | 0.005553 | 1.205223 | up   |                | CO406134         |
| A_44_P340<br>434  | 0.002446 | 1.521489 | down | Ttc38          | NM_001130<br>499 |
| A_44_P503<br>240  | 0.031519 | 1.384371 | up   | Sytl5          | NM_178333        |
| A_44_P380<br>265  | 0.047583 | 1.945174 | down | RGD15605<br>70 | XM_229665        |
| A_44_P145<br>191  | 0.022607 | 1.881243 | down |                |                  |
| A_44_P371<br>984  | 0.045004 | 1.257251 | up   | Dpp4           | J02997           |
| A_43_P183<br>02   | 0.03582  | 1.205254 | down | Mycbp2         | NM_001106<br>055 |
| A_44_P478<br>868  | 0.016564 | 1.246621 | up   |                | BQ198742         |
| A_44_P256<br>906  | 0.014193 | 1.14225  | up   |                | BQ209066         |
| A_44_P977<br>865  | 0.017604 | 1.178464 | down |                |                  |
| A_44_P117<br>335  | 0.044766 | 1.234996 | up   |                | XR_008794        |
| A_44_P122<br>439  | 0.01403  | 1.393515 | up   |                | BF395372         |
| A_44_P145<br>290  | 0.039944 | 1.193627 | up   |                | XM_213626        |

|                  |          |          |      |         |                  |
|------------------|----------|----------|------|---------|------------------|
| A_44_P605<br>605 | 0.035929 | 1.095606 | down |         |                  |
| A_44_P459<br>741 | 0.031069 | 1.139599 | down | Hexa    | NM_001004<br>443 |
| A_44_P381<br>344 | 0.03014  | 1.519623 | up   |         | AI511453         |
| A_44_P914<br>357 | 0.033889 | 2.374336 | down |         |                  |
| A_43_P108<br>90  | 0.00562  | 1.109879 | up   | Tbca    | NM_001013<br>245 |
| A_44_P295<br>703 | 0.020664 | 1.115532 | down |         | AI177361         |
| A_44_P929<br>423 | 0.019679 | 1.173285 | up   | Itga9   | XM_001061<br>864 |
| A_44_P423<br>651 | 0.03718  | 1.221848 | up   | Prss12  | NM_053504        |
| A_44_P338<br>914 | 0.03286  | 1.417479 | up   |         | BQ209894         |
| A_44_P125<br>352 | 0.018505 | 1.571784 | up   |         | BI293607         |
| A_44_P900<br>229 | 0.026166 | 1.26086  | up   |         |                  |
| A_44_P624<br>335 | 0.046701 | 1.332341 | up   |         |                  |
| A_44_P747<br>655 | 0.031386 | 1.476692 | down |         |                  |
| A_44_P246<br>010 | 0.033199 | 1.239643 | down | Kif16b  | NM_001107<br>783 |
| A_44_P419<br>403 | 0.046101 | 1.229132 | down |         | XM_238899        |
| A_43_P174<br>00  | 0.016042 | 1.383247 | down | Pmm2    | NM_001106<br>973 |
| A_44_P745<br>129 | 0.04814  | 1.69742  | down |         |                  |
| A_44_P886<br>690 | 0.037383 | 1.238463 | up   | Lpar2   | NM_001109<br>109 |
| A_44_P446<br>994 | 0.016384 | 1.128887 | down |         | BF550209         |
| A_43_P178<br>90  | 0.01666  | 1.188142 | down | Fam198a | CB606389         |
| A_44_P361<br>144 | 0.034379 | 1.408034 | down | Nacc2   | NM_001100<br>533 |
| A_44_P311<br>797 | 0.028195 | 1.747933 | down | Cpxm1   | NM_001106<br>511 |



|                  |          |          |      |                |                  |
|------------------|----------|----------|------|----------------|------------------|
| A_44_P583<br>957 | 0.042288 | 1.213238 | down |                |                  |
| A_44_P189<br>043 | 0.008674 | 1.263373 | down | Gphn           | NM_022865        |
| A_44_P217<br>452 | 0.007248 | 1.235416 | up   | Tgoln1         | NM_138840        |
| A_44_P807<br>940 | 0.046189 | 1.132017 | up   |                |                  |
| A_44_P822<br>364 | 0.039783 | 1.209615 | up   |                |                  |
| A_44_P230<br>622 | 0.031712 | 1.266525 | up   |                | BM386671         |
| A_44_P439<br>658 | 0.01879  | 1.667512 | down |                | AI105088         |
| A_44_P293<br>283 | 0.009832 | 1.295009 | down |                | XM_234433        |
| A_44_P188<br>996 | 0.046299 | 1.300718 | up   |                | AA964521         |
| A_44_P884<br>020 | 0.026392 | 1.162993 | up   |                |                  |
| A_44_P181<br>836 | 0.026679 | 1.272744 | up   |                | AW915351         |
| A_44_P538<br>406 | 0.029504 | 1.220738 | up   | Fkbp1a         | NM_013102        |
| A_44_P990<br>309 | 0.030187 | 1.257627 | down | Znf655         | NM_001008<br>362 |
| A_44_P870<br>133 | 0.014126 | 1.226208 | up   |                |                  |
| A_44_P302<br>012 | 0.023122 | 1.109577 | up   | RGD15663<br>55 | XM_235722        |
| A_44_P529<br>082 | 0.048696 | 1.278391 | up   |                | AI411809         |
| A_44_P380<br>384 | 0.007175 | 1.37425  | up   | Dscr6          | NM_001105<br>892 |
| A_44_P340<br>261 | 0.022092 | 1.573048 | down | RGD13058<br>07 | NM_001025<br>276 |
| A_44_P339<br>361 | 0.039256 | 1.203787 | up   |                | CA509438         |
| A_44_P741<br>723 | 0.011471 | 1.147947 | down | Il13ra1        | NM_145789        |
| A_44_P558<br>636 | 0.032077 | 1.204492 | up   | Ppp1r9b        | NM_053474        |
| A_44_P260<br>268 | 0.011909 | 1.18707  | down | Tinf2          | NM_001006<br>962 |

|                   |          |          |      |          |                  |
|-------------------|----------|----------|------|----------|------------------|
| A_44_P100<br>0543 | 0.003622 | 1.309256 | up   |          | CA339586         |
| A_44_P740<br>845  | 0.021365 | 1.210261 | up   |          | E00898           |
| A_44_P643<br>256  | 0.041716 | 1.661457 | up   |          |                  |
| A_44_P699<br>332  | 0.008904 | 1.187378 | up   |          |                  |
| A_44_P382<br>318  | 0.005777 | 1.403685 | up   | Pftk1    | NM_001108<br>617 |
| A_44_P248<br>591  | 0.001691 | 1.418545 | up   |          | XM_343383        |
| A_44_P188<br>015  | 0.007799 | 1.382014 | up   |          | AA818078         |
| A_44_P837<br>519  | 0.011848 | 1.653317 | up   |          |                  |
| A_43_P160<br>37   | 0.034075 | 1.430943 | down | Prkcq    | AB020614         |
| A_44_P664<br>191  | 0.038549 | 1.140874 | up   | Arhgef2  | NM_001012<br>079 |
| A_44_P899<br>530  | 0.038419 | 1.459857 | up   |          |                  |
| A_44_P730<br>251  | 0.021927 | 1.14416  | up   | Slc25a24 | NM_001127<br>544 |
| A_42_P708<br>614  | 0.01605  | 1.129875 | up   | Ndufa6   | NM_001130<br>505 |
| A_44_P460<br>754  | 0.047625 | 1.316851 | up   |          | AA859861         |
| A_43_P218<br>85   | 0.046044 | 1.287653 | up   | Antxr1   | NM_001044<br>249 |
| A_44_P118<br>315  | 0.049211 | 1.187609 | up   |          | XM_001073<br>919 |
| A_44_P335<br>816  | 0.040107 | 1.160523 | up   |          | AA924717         |
| A_44_P303<br>009  | 0.015826 | 1.39537  | up   |          | CB605594         |
| A_44_P390<br>910  | 0.018908 | 1.401294 | up   |          | AA946072         |
| A_44_P555<br>985  | 0.049038 | 1.249445 | up   |          | BI284716         |
| A_44_P110<br>400  | 0.011658 | 1.480366 | up   | Aloxe3   | NM_001105<br>793 |
| A_44_P263<br>691  | 0.045392 | 1.149919 | up   |          | AI409493         |

|                   |          |          |      |                |                  |
|-------------------|----------|----------|------|----------------|------------------|
| A_44_P213<br>272  | 0.02571  | 1.810967 | down |                |                  |
| A_44_P100<br>3210 | 0.043035 | 1.141476 | up   |                | AF452728         |
| A_44_P368<br>017  | 0.002417 | 1.632133 | up   | Pcdh17         | NM_001107<br>279 |
| A_44_P103<br>4375 | 0.022703 | 1.241535 | up   | Ptgfrn         | NM_019243        |
| A_44_P105<br>9827 | 0.033653 | 1.202911 | up   |                | AW143339         |
| A_44_P884<br>188  | 0.007639 | 1.17597  | up   |                |                  |
| A_43_P166<br>26   | 0.035155 | 2.756746 | down | Metrn          | NM_001009<br>962 |
| A_42_P571<br>169  | 0.022978 | 1.106148 | up   | Ttc17          | BC168714         |
| A_44_P311<br>046  | 0.015852 | 1.532739 | up   |                | AA946377         |
| A_44_P246<br>538  | 0.014677 | 1.276435 | up   | Tgfb2          | NM_031131        |
| A_43_P190<br>47   | 0.00952  | 1.112543 | down | Golph31        | NM_001007<br>698 |
| A_42_P473<br>302  | 0.017908 | 1.139454 | up   |                | DV728597         |
| A_43_P104<br>05   | 0.005591 | 1.375866 | up   | Klhdc5         | NM_001109<br>257 |
| A_44_P231<br>811  | 0.03834  | 1.197305 | down |                | XM_224540        |
| A_43_P164<br>60   | 0.032999 | 1.21235  | up   | Tmub2          | NM_001031<br>651 |
| A_44_P399<br>015  | 0.039224 | 1.267518 | up   |                | BF393902         |
| A_44_P899<br>822  | 0.035552 | 1.093173 | up   |                |                  |
| A_44_P356<br>812  | 0.022597 | 1.170003 | up   | Kctd5          | NM_001105<br>768 |
| A_44_P356<br>242  | 0.045078 | 1.096694 | up   | Zcche8         | NM_001105<br>929 |
| A_44_P353<br>354  | 0.032062 | 1.372433 | up   |                | AW533421         |
| A_44_P113<br>879  | 0.041681 | 1.305567 | down | Slco1a5        | NM_030838        |
| A_44_P119<br>370  | 0.031701 | 1.249594 | down | RGD13096<br>51 | XM_341702        |

|                   |          |          |      |        |                  |
|-------------------|----------|----------|------|--------|------------------|
| A_44_P976<br>979  | 0.038413 | 1.520256 | down |        |                  |
| A_44_P397<br>441  | 0.009329 | 1.103507 | up   | Eif1   | NM_001105<br>837 |
| A_44_P684<br>304  | 0.0372   | 1.16415  | up   | Mypop  | NM_001109<br>139 |
| A_44_P281<br>155  | 0.044739 | 1.319543 | down | Nek7   | NM_001108<br>346 |
| A_43_P121<br>50   | 0.013917 | 1.314364 | down | Pik3r2 | NM_022185        |
| A_43_P127<br>07   | 0.042885 | 1.675918 | up   | Ptms   | NM_031975        |
| A_44_P454<br>646  | 0.018847 | 1.134189 | down | Fam69a | NM_001170<br>456 |
| A_42_P467<br>956  | 0.049378 | 1.232209 | up   | Sestd1 | NM_001134<br>514 |
| A_44_P367<br>345  | 0.014081 | 1.404457 | up   |        | AA957788         |
| A_44_P143<br>939  | 0.045316 | 1.200336 | up   |        | DV726898         |
| A_42_P515<br>454  | 0.020032 | 1.30284  | up   | Csnk1e | NM_031617        |
| A_44_P407<br>600  | 0.046436 | 1.249313 | up   | Fam36a | NM_001105<br>976 |
| A_44_P546<br>632  | 0.015898 | 1.36437  | up   |        | BF559342         |
| A_43_P126<br>82   | 0.029204 | 1.201652 | up   | Rest   | NM_031788        |
| A_44_P249<br>743  | 0.043828 | 1.494434 | up   |        | BI294956         |
| A_42_P830<br>311  | 0.048511 | 1.502984 | down | Mrap   | NM_001135<br>834 |
| A_44_P730<br>740  | 0.046967 | 1.356422 | down |        | XM_002727<br>745 |
| A_44_P103<br>7364 | 0.025197 | 1.220767 | up   | Atp9b  | BC084699         |
| A_44_P147<br>726  | 0.041431 | 1.257337 | up   | Pgs1   | XM_221142        |
| A_42_P640<br>019  | 0.046465 | 1.178967 | up   |        |                  |
| A_44_P101<br>8464 | 0.024687 | 1.207081 | up   | Htra2  | NM_001106<br>599 |
| A_44_P122<br>545  | 0.003735 | 1.251564 | up   |        | AI317872         |

|                   |          |          |      |          |                  |
|-------------------|----------|----------|------|----------|------------------|
| A_44_P806<br>889  | 0.011928 | 1.252069 | up   |          |                  |
| A_43_P107<br>42   | 0.016418 | 1.660201 | down |          | CB547617         |
| A_44_P644<br>149  | 0.022447 | 1.620653 | up   |          |                  |
| A_42_P658<br>815  | 0.040691 | 1.164431 | up   | Atp6v1e1 | NM_198745        |
| A_44_P979<br>659  | 0.019832 | 1.190366 | up   |          |                  |
| A_44_P102<br>6984 | 0.016077 | 1.577108 | down | Asb12    | NM_001037<br>367 |
| A_44_P309<br>688  | 0.007511 | 1.140281 | down |          | XM_001064<br>690 |
| A_44_P941<br>963  | 0.031265 | 1.15558  | up   |          | CX570462         |
| A_44_P597<br>401  | 0.021779 | 1.246361 | up   |          | AI009946         |
| A_44_P226<br>470  | 0.015512 | 1.196942 | up   |          | AW534166         |
| A_44_P363<br>410  | 0.04412  | 1.265716 | up   | Ppfia1   | NM_001106<br>320 |
| A_44_P639<br>923  | 0.031249 | 1.499216 | up   |          |                  |
| A_44_P165<br>196  | 0.042171 | 1.337737 | up   |          | BI303655         |
| A_43_P100<br>06   | 0.003784 | 1.162144 | up   | Map2k3   | NM_001100<br>674 |
| A_44_P574<br>368  | 0.043378 | 1.233081 | up   |          | AA963828         |
| A_44_P540<br>660  | 0.047919 | 1.299277 | up   | Ccdc50   | NM_182736        |
| A_44_P357<br>835  | 0.032162 | 1.374448 | up   |          | BF282088         |
| A_44_P606<br>828  | 0.038434 | 1.307645 | down |          | CF108700         |
| A_44_P279<br>331  | 0.016674 | 1.642058 | down |          | XM_343561        |
| A_44_P339<br>290  | 0.043102 | 1.755216 | up   |          | AW534967         |
| A_44_P235<br>177  | 0.011051 | 1.406502 | up   |          | BM387083         |
| A_44_P129<br>330  | 0.020709 | 1.269007 | down | Rhpn2    | NM_001107<br>505 |

|                   |          |          |      |                |                  |
|-------------------|----------|----------|------|----------------|------------------|
| A_44_P854<br>045  | 0.030491 | 1.243011 | up   |                | XM_001055<br>616 |
| A_44_P310<br>851  | 0.025485 | 1.189316 | down | LOC68985<br>2  | NM_001101<br>005 |
| A_44_P885<br>003  | 0.012453 | 1.179498 | up   | Arap2          | NM_001107<br>216 |
| A_44_P884<br>221  | 0.032633 | 1.105836 | up   |                |                  |
| A_44_P465<br>684  | 0.038585 | 1.508212 | up   |                | BE120816         |
| A_42_P652<br>202  | 0.015746 | 1.221781 | up   | Rabggta        | L10415           |
| A_44_P372<br>950  | 0.020745 | 1.341826 | up   | RGD13048<br>84 | NM_001107<br>436 |
| A_44_P112<br>149  | 0.037213 | 1.127627 | up   | Tnks2          | NM_001107<br>607 |
| A_44_P304<br>402  | 0.042544 | 1.071047 | up   | Tpp2           | NM_031137        |
| A_44_P509<br>203  | 0.004554 | 4.146414 | up   | Rnf146         | AI177765         |
| A_44_P362<br>515  | 0.01954  | 1.484148 | down |                | BF283269         |
| A_44_P102<br>5454 | 0.025924 | 1.123084 | up   | Foxp1          | NM_001034<br>131 |
| A_44_P902<br>067  | 0.048258 | 1.336202 | up   |                |                  |
| A_44_P947<br>670  | 0.027361 | 1.08613  | up   |                |                  |
| A_44_P265<br>702  | 0.019835 | 1.334193 | up   | Ppfibp1        | NM_001107<br>896 |
| A_44_P105<br>871  | 0.032668 | 1.183531 | up   |                | AI411021         |
| A_44_P620<br>032  | 0.026516 | 1.337556 | up   |                | AI317880         |
| A_44_P930<br>160  | 0.03492  | 1.129772 | up   | Pdcd6ip        | NM_001029<br>910 |
| A_44_P351<br>943  | 0.005165 | 1.342533 | up   | Nfx1           | NM_001024<br>784 |
| A_44_P332<br>422  | 0.042534 | 1.506129 | down | C1s            | NM_138900        |
| A_43_P176<br>63   | 0.046276 | 1.204923 | up   | Socs5          | NM_001109<br>274 |
| A_44_P387<br>246  | 0.013623 | 1.251257 | up   | Sin3a          | NM_001108<br>761 |

|                  |          |          |      |                  |                  |
|------------------|----------|----------|------|------------------|------------------|
| A_44_P860<br>400 | 0.01763  | 1.281708 | up   |                  | CK839443         |
| A_44_P166<br>544 | 0.040367 | 1.326657 | up   |                  | CK478588         |
| A_44_P244<br>076 | 0.022981 | 1.280211 | up   |                  | CK476138         |
| A_44_P290<br>703 | 0.045923 | 1.204403 | down | LOC10036<br>3748 | XR_085745        |
| A_44_P809<br>962 | 0.042108 | 1.173821 | up   |                  |                  |
| A_44_P526<br>441 | 0.023982 | 1.227174 | up   |                  | BE112479         |
| A_44_P150<br>654 | 0.047837 | 1.247753 | up   |                  | AI171992         |
| A_44_P665<br>620 | 0.026452 | 1.222834 | up   |                  | BP490619         |
| A_44_P557<br>428 | 0.048844 | 1.775289 | down |                  | AF370009         |
| A_44_P352<br>061 | 0.030266 | 1.299603 | up   |                  | XM_234862        |
| A_44_P107<br>132 | 0.047781 | 1.481454 | down | Mapk8ip1         | NM_053777        |
| A_44_P139<br>494 | 0.019167 | 1.764441 | down | LOC68896<br>6    | CN543488         |
| A_44_P196<br>939 | 0.040364 | 1.439017 | down |                  | XM_001080<br>437 |
| A_44_P513<br>385 | 0.022577 | 1.177154 | up   | Dab2             | NM_024159        |
| A_44_P243<br>599 | 0.004778 | 1.345782 | down | RGD15663<br>20   | NM_001106<br>520 |
| A_44_P463<br>759 | 0.021974 | 1.457781 | up   | Prickle1         | NM_199396        |
| A_44_P769<br>703 | 0.044208 | 1.823211 | up   | Nrep             | NM_178096        |
| A_44_P176<br>042 | 0.045518 | 2.421349 | down | Slfn1            | XM_001068<br>751 |
| A_44_P158<br>173 | 0.020423 | 1.165309 | up   |                  | AA964184         |
| A_44_P215<br>917 | 0.02143  | 1.876106 | up   | Plexd2           | NM_001134<br>481 |
| A_44_P520<br>810 | 0.012578 | 1.38393  | down | LOC10035<br>9818 | XM_002727<br>014 |
| A_44_P496<br>706 | 0.005164 | 1.43598  | down | Ikbke            | NM_001108<br>854 |

|                   |          |          |      |         |                  |
|-------------------|----------|----------|------|---------|------------------|
| A_44_P129<br>853  | 0.020608 | 1.329178 | up   |         | FM142573         |
| A_44_P807<br>993  | 0.018161 | 1.247584 | up   |         |                  |
| A_44_P147<br>047  | 0.004111 | 1.229772 | up   | Adam10  | Z48444           |
| A_44_P557<br>894  | 0.024124 | 1.136795 | down |         | XR_008926        |
| A_44_P466<br>183  | 0.04216  | 1.433129 | up   | Rap2b   | NM_133410        |
| A_44_P941<br>990  | 0.018593 | 1.104935 | up   |         | BF548061         |
| A_44_P138<br>224  | 0.035169 | 1.239644 | up   | Vezt    | NM_001006<br>984 |
| A_42_P747<br>311  | 0.017125 | 1.212929 | up   |         | AF175208         |
| A_44_P652<br>021  | 0.04217  | 1.239013 | down |         |                  |
| A_42_P467<br>994  | 0.024713 | 1.161967 | up   | Slc12a4 | NM_019229        |
| A_42_P745<br>623  | 0.011076 | 1.337367 | up   | Sec14l1 | NM_001108<br>309 |
| A_44_P383<br>088  | 0.022443 | 1.578453 | down |         | AF366899         |
| A_42_P830<br>209  | 0.0203   | 1.66638  | down | Frmpd1  | NM_001107<br>937 |
| A_44_P207<br>403  | 0.025507 | 1.617278 | up   |         | AA998473         |
| A_44_P507<br>419  | 0.005566 | 1.232424 | up   | Trak2   | NM_133560        |
| A_44_P237<br>564  | 0.039556 | 1.165218 | up   |         | BF560252         |
| A_44_P467<br>090  | 0.031425 | 1.232867 | up   |         | BF419646         |
| A_44_P999<br>889  | 0.027428 | 1.101823 | up   | Tmem57  | NM_001025<br>699 |
| A_42_P554<br>066  | 0.024901 | 1.246993 | down | Tasp1   | NM_001044<br>243 |
| A_43_P171<br>64   | 0.034612 | 1.28521  | up   | Pcaf    | XM_217321        |
| A_44_P103<br>2732 | 0.047153 | 1.286719 | up   | B4galt6 | NM_031740        |
| A_44_P580<br>559  | 0.045684 | 1.141251 | up   |         | FM082204         |



|                  |          |          |      |          |                  |
|------------------|----------|----------|------|----------|------------------|
| A_44_P545<br>114 | 0.033431 | 1.268457 | up   |          | AA899814         |
| A_44_P267<br>610 | 0.017809 | 1.357484 | up   | Trib2    | NM_001108<br>015 |
| A_43_P211<br>66  | 0.024743 | 1.483861 | up   | Ptprm    | NM_001168<br>632 |
| A_42_P815<br>346 | 0.018249 | 1.293044 | up   |          | AA998118         |
| A_44_P331<br>199 | 0.035269 | 1.220674 | up   |          | BE120644         |
| A_44_P363<br>949 | 0.031114 | 1.258946 | up   |          | AI103314         |
| A_44_P235<br>591 | 0.04065  | 1.392385 | up   |          | CA504421         |
| A_42_P571<br>260 | 0.033604 | 1.376491 | down | Maf1     | NM_001014<br>085 |
| A_44_P684<br>795 | 0.043569 | 1.23215  | up   | Irs2     | NM_001168<br>633 |
| A_44_P240<br>526 | 0.026408 | 1.231439 | up   |          | AI071379         |
| A_44_P554<br>486 | 0.036571 | 1.18732  | up   |          | AA850579         |
| A_44_P526<br>046 | 0.046183 | 1.382402 | up   |          | BQ196010         |
| A_44_P531<br>076 | 0.049376 | 1.178824 | up   |          | AI010962         |
| A_44_P135<br>728 | 0.008387 | 1.213139 | up   |          |                  |
| A_43_P219<br>25  | 0.049016 | 1.597554 | up   | Mll2     | XM_002729<br>854 |
| A_42_P482<br>349 | 0.03647  | 1.07317  | up   | Rab3gap2 | NM_001040<br>154 |
| A_44_P665<br>667 | 0.009475 | 1.36988  | up   |          | AI171211         |
| A_44_P362<br>425 | 0.004086 | 1.275598 | up   |          | BM384026         |
| A_44_P808<br>472 | 0.030115 | 1.228972 | up   |          |                  |
| A_44_P516<br>306 | 0.004057 | 1.14008  | up   | Pygo2    | NM_001106<br>447 |
| A_44_P992<br>812 | 0.023522 | 1.43889  | up   | Pcdhac2  | NM_201422        |
| A_44_P684<br>740 | 0.021138 | 1.322638 | up   | Pcdh17   | NM_001107<br>279 |

|                  |          |          |      |               |                  |
|------------------|----------|----------|------|---------------|------------------|
| A_44_P815<br>724 | 0.028097 | 1.406288 | up   |               |                  |
| A_44_P866<br>810 | 0.012957 | 1.12206  | up   | Tead2         | NM_001107<br>512 |
| A_44_P414<br>136 | 0.008619 | 1.352433 | up   |               | AA818098         |
| A_44_P412<br>452 | 0.005485 | 1.596116 | up   | Sh3pxd2a      | NM_001107<br>606 |
| A_44_P141<br>872 | 0.039047 | 1.387364 | up   |               | BG372685         |
| A_44_P145<br>239 | 0.03479  | 1.142782 | down | LOC68392<br>0 | XM_002724<br>599 |
| A_44_P315<br>773 | 0.032874 | 1.358286 | up   |               | AI028932         |
| A_44_P368<br>679 | 0.026573 | 1.445548 | up   |               | BF283449         |
| A_44_P253<br>073 | 0.01224  | 1.734332 | down | Aspn          | NM_001014<br>008 |
| A_44_P115<br>769 | 0.010632 | 1.507092 | up   |               | AI171654         |
| A_42_P817<br>668 | 0.017951 | 1.316072 | down |               | BC086427         |
| A_44_P729<br>396 | 0.037967 | 1.174644 | up   |               |                  |
| A_44_P666<br>038 | 0.022332 | 1.251837 | up   |               | CF110295         |
| A_43_P117<br>63  | 0.003807 | 1.425238 | up   | Add1          | Z49081           |
| A_43_P112<br>10  | 0.026298 | 1.281644 | up   | Srpr          | NM_001034<br>150 |
| A_44_P724<br>632 | 0.045972 | 1.14772  | up   |               | AI176008         |
| A_44_P457<br>468 | 0.006028 | 1.122942 | down |               | XM_236837        |
| A_44_P455<br>826 | 0.035804 | 1.211609 | up   |               | AI178769         |
| A_44_P362<br>016 | 0.045361 | 1.98155  | up   |               | AY325180         |
| A_44_P551<br>054 | 0.002346 | 1.664709 | up   | Rassf3        | NM_001108<br>747 |
| A_44_P552<br>072 | 0.032521 | 1.273236 | up   |               | BI281621         |
| A_44_P137<br>545 | 0.024773 | 1.701397 | up   | Iars          | U75923           |

|                  |          |          |      |          |                  |
|------------------|----------|----------|------|----------|------------------|
| A_44_P515<br>798 | 0.014036 | 1.632816 | down | Ucma     | NM_001106<br>121 |
| A_44_P439<br>812 | 0.02292  | 1.1369   | up   |          | AI171267         |
| A_44_P438<br>426 | 0.027727 | 1.755154 | down | Scara5   | NM_001135<br>855 |
| A_42_P746<br>851 | 0.010511 | 1.347611 | up   |          | AW916157         |
| A_44_P886<br>124 | 0.044739 | 1.220248 | up   |          |                  |
| A_44_P376<br>454 | 0.02372  | 1.200817 | up   |          | AA858545         |
| A_44_P255<br>449 | 0.005953 | 1.252264 | up   | Col4a3bp | NM_001108<br>935 |
| A_44_P249<br>930 | 0.044123 | 1.30476  | up   |          | AW140722         |
| A_44_P287<br>766 | 0.046697 | 1.206341 | up   |          | AI603162         |
| A_44_P423<br>036 | 0.02361  | 1.227437 | up   |          | AI232307         |
| A_44_P273<br>503 | 0.028668 | 1.140581 | up   | Pigp     | AA926031         |
| A_44_P828<br>963 | 0.025209 | 1.487822 | down | Sit1     | NM_001024<br>344 |
| A_42_P816<br>427 | 0.00698  | 1.599502 | down | Wisp1    | NM_031716        |
| A_44_P905<br>187 | 0.028792 | 1.510563 | down | Dnajc6   | NM_001107<br>949 |
| A_44_P638<br>170 | 0.035255 | 1.303199 | down |          | XM_001072<br>957 |
| A_44_P296<br>651 | 0.035396 | 1.312084 | up   |          | AI706451         |
| A_42_P453<br>737 | 0.025696 | 1.326601 | up   |          | AW918040         |
| A_44_P740<br>179 | 0.021999 | 1.235348 | down |          | AI180087         |
| A_44_P228<br>806 | 0.038945 | 1.242854 | up   |          | AI170276         |
| A_44_P970<br>247 | 0.046633 | 1.095106 | up   | Nicn1    | NM_001034<br>999 |
| A_44_P185<br>174 | 0.029172 | 1.552901 | down |          | EX493555         |
| A_44_P538<br>086 | 0.028802 | 1.425259 | up   | Mboat2   | NM_001108<br>016 |

|                   |          |          |      |               |                  |
|-------------------|----------|----------|------|---------------|------------------|
| A_43_P196<br>40   | 0.024231 | 1.192458 | up   | Tnks1bp1      | XM_215763        |
| A_43_P103<br>53   | 0.048617 | 1.169057 | up   |               | XM_213569        |
| A_42_P472<br>274  | 0.003212 | 1.422646 | down | Slurp1        | NM_001130<br>544 |
| A_44_P687<br>542  | 0.032713 | 1.196688 | up   | LOC68801<br>8 | XR_009418        |
| A_44_P240<br>621  | 0.03584  | 1.321946 | up   |               | BP466593         |
| A_44_P837<br>538  | 0.040939 | 1.937934 | up   |               | M23953           |
| A_44_P115<br>378  | 0.026583 | 1.148773 | up   | Ssbp3         | NM_053358        |
| A_44_P107<br>850  | 0.025017 | 1.433426 | up   |               | XM_002727<br>665 |
| A_44_P350<br>652  | 0.03905  | 1.112934 | up   |               | BI395724         |
| A_44_P381<br>906  | 0.009526 | 1.329695 | up   | Slk           | NM_019349        |
| A_42_P739<br>488  | 0.04954  | 1.260259 | up   |               | BF556222         |
| A_42_P766<br>027  | 0.021494 | 1.555508 | up   |               | BC089996         |
| A_44_P538<br>275  | 0.038381 | 1.278222 | down |               | L26525           |
| A_44_P211<br>630  | 0.022701 | 1.196186 | up   |               | BU946548         |
| A_44_P104<br>0503 | 0.032252 | 1.377202 | up   | Pctp          | AF040261         |
| A_44_P935<br>107  | 0.046398 | 1.210387 | up   |               | FM093176         |
| A_44_P195<br>999  | 0.031858 | 1.366576 | up   |               | AA800882         |
| A_44_P808<br>013  | 0.018635 | 1.135914 | down |               | CO402766         |
| A_44_P596<br>051  | 0.028825 | 1.724517 | down |               | DY471163         |
| A_44_P992<br>468  | 0.004608 | 1.155778 | up   | Trappc5       | NM_001108<br>850 |
| A_42_P470<br>757  | 0.006108 | 1.094666 | down | Rnf34         | NM_001004<br>075 |
| A_44_P524<br>779  | 0.040129 | 1.391162 | down | Slc4a5        | NM_212512        |

|                   |          |          |      |                |                  |
|-------------------|----------|----------|------|----------------|------------------|
| A_43_P109<br>52   | 0.027872 | 1.15499  | up   |                | AABR03057<br>257 |
| A_44_P172<br>787  | 0.009188 | 1.263524 | down | Serpina11      | NM_001008<br>776 |
| A_44_P854<br>406  | 0.010755 | 1.221004 | up   |                | EV770773         |
| A_44_P101<br>3872 | 0.027463 | 1.182137 | up   | Mon1b          | NM_001107<br>433 |
| A_44_P384<br>083  | 0.040337 | 1.121136 | down | Nyw1           | NM_001134<br>341 |
| A_44_P577<br>155  | 0.045374 | 1.131929 | up   |                |                  |
| A_44_P287<br>803  | 0.03514  | 1.459485 | up   |                | AA996470         |
| A_42_P669<br>544  | 0.04946  | 1.212433 | up   | Cpm            | NM_001108<br>098 |
| A_44_P527<br>521  | 0.044475 | 1.189854 | up   | RGD13060<br>58 | NM_001134<br>572 |
| A_44_P154<br>773  | 0.0446   | 1.200127 | down |                | XR_008646        |
| A_44_P358<br>582  | 0.024014 | 1.258998 | down |                | XM_222276        |
| A_44_P131<br>209  | 0.028269 | 1.150827 | down |                | XR_085617        |
| A_44_P195<br>839  | 0.030939 | 1.151531 | down | Chmp1b         | NM_001109<br>533 |
| A_44_P310<br>771  | 0.015169 | 1.214276 | up   |                | DY471696         |
| A_44_P101<br>6988 | 0.014392 | 1.282918 | up   | Stard9         | XM_230493        |
| A_42_P758<br>052  | 0.029103 | 1.084861 | up   | Acp6           | NM_001031<br>645 |
| A_44_P334<br>139  | 0.043017 | 1.157455 | up   |                | XM_001075<br>972 |
| A_44_P174<br>749  | 0.0343   | 1.769452 | down |                | BF396509         |
| A_42_P544<br>898  | 0.01448  | 1.531351 | up   | Bcl6b          | NM_001108<br>279 |
| A_44_P591<br>895  | 0.008235 | 1.275599 | up   |                |                  |
| A_44_P137<br>623  | 0.014214 | 1.342016 | up   | Ppp1r9b        | NM_053474        |
| A_44_P101<br>6829 | 0.035968 | 1.264336 | up   | Trib1          | NM_023985        |

|                   |          |          |      |               |                  |
|-------------------|----------|----------|------|---------------|------------------|
| A_43_P166<br>30   | 0.025258 | 1.129481 | up   | Ostc          | NM_001108<br>566 |
| A_42_P732<br>259  | 0.030217 | 1.522345 | down | Fam26f        | NM_001024<br>976 |
| A_44_P627<br>982  | 0.043097 | 1.144145 | down |               |                  |
| A_44_P901<br>368  | 0.028792 | 1.220498 | up   |               |                  |
| A_44_P652<br>617  | 0.048849 | 1.328353 | up   | Chd8          | NM_022933        |
| A_44_P100<br>197  | 0.032669 | 1.19923  | down | Zfp799        | NM_001009<br>537 |
| A_44_P113<br>244  | 0.038343 | 1.176659 | down |               | AI044569         |
| A_44_P112<br>322  | 0.013372 | 1.432456 | up   |               | XR_006437        |
| A_44_P532<br>557  | 0.019193 | 1.382802 | down | LOC30413<br>1 | NM_001013<br>979 |
| A_44_P991<br>399  | 0.040015 | 1.101744 | up   | Paf1          | NM_001024<br>898 |
| A_44_P136<br>679  | 0.043765 | 1.233567 | down | Isoc1         | NM_001014<br>242 |
| A_44_P574<br>959  | 0.032946 | 1.238532 | down | LOC68169<br>4 | NM_001044<br>279 |
| A_44_P121<br>935  | 0.028582 | 1.175787 | up   | Hdac10        | NM_001035<br>000 |
| A_44_P545<br>948  | 0.036549 | 1.614602 | down |               |                  |
| A_44_P353<br>955  | 0.04451  | 1.818727 | down |               | XM_574644        |
| A_44_P121<br>325  | 0.019625 | 1.138354 | up   | Rab22a        | NM_001108<br>966 |
| A_44_P101<br>1018 | 0.046378 | 1.123218 | down | Nkap          | NM_001024<br>872 |
| A_44_P408<br>347  | 0.034843 | 1.240033 | up   |               | BE109513         |
| A_44_P745<br>488  | 0.036568 | 1.139328 | up   | Pcnx          | NM_001170<br>347 |
| A_44_P103<br>9809 | 0.035206 | 1.199276 | up   | Rasip1        | NM_001106<br>261 |
| A_42_P604<br>331  | 0.031133 | 1.369711 | up   | Spock2        | NM_001108<br>533 |
| A_44_P414<br>139  | 0.015609 | 1.237114 | up   |               | BE117892         |

|                  |          |          |      |                |                  |
|------------------|----------|----------|------|----------------|------------------|
| A_44_P181<br>616 | 0.036133 | 1.178952 | up   |                | AA926004         |
| A_44_P531<br>273 | 0.048485 | 1.127428 | up   |                | AI169642         |
| A_44_P532<br>754 | 0.012765 | 1.144906 | up   | Pbx3           | NM_001107<br>834 |
| A_44_P745<br>115 | 0.031186 | 1.19698  | up   | Pogk           | NM_001107<br>194 |
| A_44_P285<br>161 | 0.009913 | 1.22884  | up   |                | AI101103         |
| A_44_P303<br>492 | 0.008526 | 1.592822 | up   |                | AI168935         |
| A_44_P712<br>484 | 0.002156 | 1.13736  | up   | RGD13097<br>62 | XM_222205        |
| A_44_P840<br>399 | 0.024972 | 1.361139 | up   |                |                  |
| A_44_P212<br>294 | 0.020287 | 1.160545 | up   |                | DY472414         |
| A_44_P437<br>001 | 0.009102 | 1.439571 | up   |                | BF407099         |
| A_44_P408<br>050 | 0.006224 | 1.246763 | up   | Ckap4          | NM_001108<br>740 |
| A_42_P479<br>920 | 0.013908 | 1.051432 | up   | Srp14          | NM_001106<br>497 |
| A_43_P114<br>48  | 0.043248 | 1.41161  | down | Cp             | NM_012532        |
| A_44_P472<br>271 | 0.011224 | 1.270874 | up   | Rgl1           | NM_001105<br>957 |
| A_42_P557<br>293 | 0.031633 | 1.218435 | up   | Rfesd          | NM_001108<br>540 |
| A_44_P200<br>233 | 0.027328 | 1.071365 | up   | Nrd1           | NM_012993        |
| A_44_P314<br>876 | 0.038392 | 1.18827  | up   | Six5           | NM_001107<br>485 |
| A_44_P452<br>978 | 0.011642 | 1.543826 | up   |                | BE110169         |
| A_44_P730<br>016 | 0.02538  | 1.207151 | up   |                |                  |
| A_44_P113<br>662 | 0.008486 | 1.171244 | up   |                | AA925959         |
| A_44_P848<br>109 | 0.019352 | 1.24783  | up   |                | AW916604         |
| A_44_P275<br>142 | 0.037688 | 1.154931 | up   | Ankrd26        | XM_232319        |

|                  |          |          |    |       |           |
|------------------|----------|----------|----|-------|-----------|
| A_44_P159<br>040 | 0.005487 | 1.122013 | up | Vegfb | NM_053549 |
| A_44_P219<br>128 | 0.019359 | 1.335667 | up |       | AW527533  |

---



S3 Table Analyzed proteomics parameters of lung tissue of chronic obstructive pulmonary disease rats

| Identified Proteins                                     | Accession Number | Molecular Weight | Ref | log2 (B/A) | Ratio (B/A) |
|---------------------------------------------------------|------------------|------------------|-----|------------|-------------|
| Sideroflexin-3                                          | IPI00200069      | 35 kDa           | Ref | -1         | 0.5         |
| Keratin, type I cytoskeletal 18                         | IPI00480679      | 48 kDa           | Ref | -0.7       | 0.615572207 |
| Proteasome subunit beta type-3                          | IPI00214889      | 23 kDa           | Ref | -0.7       | 0.615572207 |
| Sodium/potassium-transporting ATPase subunit alpha-1    | IPI00326305      | 113 kDa          | Ref | -0.7       | 0.615572207 |
| Protein DJ-1                                            | IPI00212523      | 20 kDa           | Ref | -0.6       | 0.659753955 |
| Annexin A3                                              | IPI00207390      | 36 kDa           | Ref | -0.6       | 0.659753955 |
| inorganic pyrophosphatase                               | IPI00915560      | 33 kDa           | Ref | -0.6       | 0.659753955 |
| Calpain-2 catalytic subunit                             | IPI00388249      | 80 kDa           | Ref | -0.6       | 0.659753955 |
| Alpha-1-macroglobulin                                   | IPI00326140      | 167 kDa          | Ref | -0.5       | 0.707106781 |
| Phosphoglycerate kinase 1                               | IPI00231426      | 45 kDa           | Ref | -0.5       | 0.707106781 |
| Uteroglobin                                             | IPI00189150      | 10 kDa           | Ref | -0.5       | 0.707106781 |
| Uncharacterized protein                                 | IPI00199867      | 95 kDa           | Ref | -0.5       | 0.707106781 |
| Guanine nucleotide-binding protein G(i) subunit alpha-2 | IPI00231925      | 41 kDa           | Ref | -0.5       | 0.707106781 |
| Hemoglobin subunit alpha-1/2                            | IPI00287835      | 15 kDa           | Ref | -0.4       | 0.757858283 |
| myosin-6                                                | IPI00189809      | 224 kDa          | Ref | -0.4       | 0.757858283 |
| Uncharacterized protein                                 | IPI00231136      | 137 kDa          | Ref | -0.4       | 0.757858283 |
| Carbonic anhydrase 1                                    | IPI00360930      | 28 kDa           | Ref | -0.4       | 0.757858283 |
| inter-alpha-inhibitor H4 heavy chain                    | IPI00188541      | 104 kDa          | Ref | -0.4       | 0.757858283 |
| Uncharacterized protein                                 | IPI00781155      | 37 kDa           | Ref | -0.3       | 0.812252396 |

|                                                          |                 |         |         |      |                 |
|----------------------------------------------------------|-----------------|---------|---------|------|-----------------|
| Serpin H1                                                | IPI002047<br>03 | 47 kDa  | Re<br>f | -0.3 | 0.81225239<br>6 |
| Lumican                                                  | IPI002064<br>03 | 38 kDa  | Re<br>f | -0.3 | 0.81225239<br>6 |
| Complement C4                                            | IPI002130<br>36 | 192 kDa | Re<br>f | -0.3 | 0.81225239<br>6 |
| Isoform 1 of Cell division control<br>protein 42 homolog | IPI002856<br>06 | 21 kDa  | Re<br>f | -0.3 | 0.81225239<br>6 |
| Protein disulfide-isomerase                              | IPI001988<br>87 | 57 kDa  | Re<br>f | -0.3 | 0.81225239<br>6 |
| Isoform 1 of Alpha-1B-glycoprotein                       | IPI001890<br>58 | 56 kDa  | Re<br>f | -0.3 | 0.81225239<br>6 |
| chloride intracellular channel 3                         | IPI003719<br>90 | 27 kDa  | Re<br>f | -0.3 | 0.81225239<br>6 |
| Carbonic anhydrase 2                                     | IPI002307<br>87 | 29 kDa  | Re<br>f | -0.3 | 0.81225239<br>6 |
| Uncharacterized protein                                  | IPI001900<br>20 | 115 kDa | Re<br>f | -0.3 | 0.81225239<br>6 |
| Myosin light chain 4                                     | IPI002144<br>57 | 21 kDa  | Re<br>f | -0.3 | 0.81225239<br>6 |
| Zero beta-1 globin                                       | IPI002071<br>46 | 16 kDa  | Re<br>f | -0.2 | 0.87055056<br>3 |
| L-lactate dehydrogenase A chain                          | IPI001977<br>11 | 36 kDa  | Re<br>f | -0.2 | 0.87055056<br>3 |
| Actin, alpha cardiac muscle 1                            | IPI001940<br>87 | 42 kDa  | Re<br>f | -0.2 | 0.87055056<br>3 |
| Transgelin                                               | IPI002311<br>96 | 23 kDa  | Re<br>f | -0.2 | 0.87055056<br>3 |
| Glyceraldehyde-3-phosphate<br>dehydrogenase              | IPI005552<br>52 | 36 kDa  | Re<br>f | -0.2 | 0.87055056<br>3 |
| Isoform 1 of Tropomyosin alpha-1<br>chain                | IPI001978<br>88 | 33 kDa  | Re<br>f | -0.2 | 0.87055056<br>3 |
| Trifunctional enzyme subunit alpha,<br>mitochondrial     | IPI002126<br>22 | 83 kDa  | Re<br>f | -0.2 | 0.87055056<br>3 |
| destrin-like                                             | IPI003731<br>40 | 19 kDa  | Re<br>f | -0.2 | 0.87055056<br>3 |
| Annexin A8                                               | IPI003580<br>87 | 37 kDa  | Re<br>f | -0.2 | 0.87055056<br>3 |
| Pulmonary surfactant-associated protein<br>A             | IPI003275<br>02 | 26 kDa  | Re<br>f | -0.2 | 0.87055056<br>3 |
| Plasmalemma vesicle-associated protein                   | IPI002045<br>04 | 50 kDa  | Re<br>f | -0.2 | 0.87055056<br>3 |
| Tropomodulin 3                                           | IPI003735<br>05 | 39 kDa  | Re<br>f | -0.2 | 0.87055056<br>3 |

|                                                                                |                 |         |         |      |                 |
|--------------------------------------------------------------------------------|-----------------|---------|---------|------|-----------------|
| Actin-related protein 2                                                        | IPI003620<br>72 | 45 kDa  | Re<br>f | -0.2 | 0.87055056<br>3 |
| Uncharacterized protein                                                        | IPI002102<br>24 | 309 kDa | Re<br>f | -0.2 | 0.87055056<br>3 |
| ADP/ATP translocase 1                                                          | IPI002319<br>27 | 33 kDa  | Re<br>f | -0.2 | 0.87055056<br>3 |
| RCG39189, isoform CRA_a                                                        | IPI003646<br>21 | 54 kDa  | Re<br>f | -0.2 | 0.87055056<br>3 |
| Serum albumin                                                                  | IPI001917<br>37 | 69 kDa  | Re<br>f | -0.1 | 0.93303299<br>2 |
| Myosin-9                                                                       | IPI002091<br>13 | 226 kDa | Re<br>f | -0.1 | 0.93303299<br>2 |
| Isoform 1 of Serotransferrin                                                   | IPI006792<br>02 | 76 kDa  | Re<br>f | -0.1 | 0.93303299<br>2 |
| Isoform 1 of Murinoglobulin-1                                                  | IPI002126<br>66 | 165 kDa | Re<br>f | -0.1 | 0.93303299<br>2 |
| Isoform 2 of Tropomyosin beta chain                                            | IPI001877<br>31 | 33 kDa  | Re<br>f | -0.1 | 0.93303299<br>2 |
| Alpha-1-antiproteinase                                                         | IPI003240<br>19 | 46 kDa  | Re<br>f | -0.1 | 0.93303299<br>2 |
| 14-3-3 protein epsilon                                                         | IPI003251<br>35 | 29 kDa  | Re<br>f | -0.1 | 0.93303299<br>2 |
| EH domain-containing protein 2                                                 | IPI002114<br>48 | 61 kDa  | Re<br>f | -0.1 | 0.93303299<br>2 |
| Apolipoprotein A-I                                                             | IPI001977<br>03 | 30 kDa  | Re<br>f | -0.1 | 0.93303299<br>2 |
| Aldehyde dehydrogenase,<br>mitochondrial                                       | IPI001977<br>70 | 56 kDa  | Re<br>f | -0.1 | 0.93303299<br>2 |
| Peptidyl-prolyl cis-trans isomerase A                                          | IPI003877<br>71 | 18 kDa  | Re<br>f | -0.1 | 0.93303299<br>2 |
| Guanine deaminase                                                              | IPI003258<br>84 | 51 kDa  | Re<br>f | -0.1 | 0.93303299<br>2 |
| Malate dehydrogenase, mitochondrial                                            | IPI001976<br>96 | 36 kDa  | Re<br>f | -0.1 | 0.93303299<br>2 |
| Vesicle amine transport protein 1<br>homolog (T californica), isoform<br>CRA_a | IPI002019<br>69 | 43 kDa  | Re<br>f | -0.1 | 0.93303299<br>2 |
| Transitional endoplasmic reticulum<br>ATPase                                   | IPI002120<br>14 | 89 kDa  | Re<br>f | -0.1 | 0.93303299<br>2 |
| Thioredoxin                                                                    | IPI002313<br>68 | 12 kDa  | Re<br>f | -0.1 | 0.93303299<br>2 |
| Acetyl-CoA acetyltransferase,<br>mitochondrial                                 | IPI003243<br>02 | 45 kDa  | Re<br>f | -0.1 | 0.93303299<br>2 |

|                                                            |                 |         |         |      |                 |
|------------------------------------------------------------|-----------------|---------|---------|------|-----------------|
| Heat shock protein HSP 90-beta                             | IPI004715<br>84 | 83 kDa  | Re<br>f | -0.1 | 0.93303299<br>2 |
| Desmin                                                     | IPI004215<br>17 | 53 kDa  | Re<br>f | -0.1 | 0.93303299<br>2 |
| Glutathione S-transferase Mu 2                             | IPI004112<br>30 | 26 kDa  | Re<br>f | -0.1 | 0.93303299<br>2 |
| ATP-citrate synthase isoform 1                             | IPI002146<br>65 | 121 kDa | Re<br>f | -0.1 | 0.93303299<br>2 |
| Phosphatidylethanolamine-binding<br>protein 1              | IPI002309<br>37 | 21 kDa  | Re<br>f | -0.1 | 0.93303299<br>2 |
| protein disulfide-isomerase A6                             | IPI003659<br>29 | 49 kDa  | Re<br>f | -0.1 | 0.93303299<br>2 |
| Uncharacterized protein                                    | IPI003649<br>32 | 31 kDa  | Re<br>f | -0.1 | 0.93303299<br>2 |
| Aconitate hydratase, mitochondrial                         | IPI004215<br>39 | 85 kDa  | Re<br>f | -0.1 | 0.93303299<br>2 |
| Bifunctional purine biosynthesis protein<br>PURH           | IPI003933<br>33 | 64 kDa  | Re<br>f | -0.1 | 0.93303299<br>2 |
| Citrate synthase, mitochondrial                            | IPI002069<br>77 | 52 kDa  | Re<br>f | -0.1 | 0.93303299<br>2 |
| Peroxiredoxin-1                                            | IPI002117<br>79 | 22 kDa  | Re<br>f | -0.1 | 0.93303299<br>2 |
| Fructose-bisphosphate aldolase A                           | IPI002317<br>34 | 39 kDa  | Re<br>f | -0.1 | 0.93303299<br>2 |
| 60S acidic ribosomal protein P2                            | IPI001888<br>04 | 12 kDa  | Re<br>f | -0.1 | 0.93303299<br>2 |
| C9 protein                                                 | IPI002314<br>23 | 64 kDa  | Re<br>f | -0.1 | 0.93303299<br>2 |
| Isoform 1 of Heterogeneous nuclear<br>ribonucleoprotein D0 | IPI002010<br>32 | 38 kDa  | Re<br>f | -0.1 | 0.93303299<br>2 |
| Uncharacterized protein                                    | IPI002026<br>51 | 87 kDa  | Re<br>f | -0.1 | 0.93303299<br>2 |
| Triosephosphate isomerase                                  | IPI002317<br>67 | 27 kDa  | Re<br>f | -0.1 | 0.93303299<br>2 |
| Alpha-actinin-1                                            | IPI002090<br>82 | 103 kDa | Re<br>f | -0.1 | 0.93303299<br>2 |
| Heat shock 70 kDa protein 1A/1B                            | IPI001967<br>51 | 70 kDa  | Re<br>f | -0.1 | 0.93303299<br>2 |
| tensin 1                                                   | IPI003627<br>55 | 204 kDa | Re<br>f | -0.1 | 0.93303299<br>2 |
| Actin, cytoplasmic 1                                       | IPI001898<br>19 | 42 kDa  | Re<br>f | 0.1  | 1.07177346<br>3 |
| myosin, heavy chain 11, smooth muscle<br>isoform 3         | IPI007641<br>67 | 228 kDa | Re<br>f | 0.1  | 1.07177346<br>3 |

|                                                                             |             |         |     |     |             |
|-----------------------------------------------------------------------------|-------------|---------|-----|-----|-------------|
| Polymerase I and transcript release factor                                  | IPI00201300 | 44 kDa  | Ref | 0.1 | 1.071773463 |
| Uncharacterized protein                                                     | IPI00190577 | 404 kDa | Ref | 0.1 | 1.071773463 |
| Serine protease inhibitor A3K                                               | IPI00200593 | 47 kDa  | Ref | 0.1 | 1.071773463 |
| Annexin A5                                                                  | IPI00471889 | 36 kDa  | Ref | 0.1 | 1.071773463 |
| Uncharacterized protein                                                     | IPI00367479 | 229 kDa | Ref | 0.1 | 1.071773463 |
| Liver regeneration protein Irryan                                           | IPI00392216 | 68 kDa  | Ref | 0.1 | 1.071773463 |
| Laminin subunit beta-2                                                      | IPI00212868 | 196 kDa | Ref | 0.1 | 1.071773463 |
| Keratin, type I cytoskeletal 19                                             | IPI00207014 | 45 kDa  | Ref | 0.1 | 1.071773463 |
| Fatty acid synthase                                                         | IPI00200661 | 273 kDa | Ref | 0.1 | 1.071773463 |
| Tubulin beta-2C chain                                                       | IPI00400573 | 50 kDa  | Ref | 0.1 | 1.071773463 |
| Uncharacterized protein                                                     | IPI00197362 | 17 kDa  | Ref | 0.1 | 1.071773463 |
| Heat shock cognate 71 kDa protein                                           | IPI00208205 | 71 kDa  | Ref | 0.1 | 1.071773463 |
| Plectin 6                                                                   | IPI00209000 | 534 kDa | Ref | 0.1 | 1.071773463 |
| Keratin, type II cytoskeletal 8                                             | IPI00389571 | 54 kDa  | Ref | 0.1 | 1.071773463 |
| Glucose-6-phosphate isomerase                                               | IPI00364311 | 63 kDa  | Ref | 0.1 | 1.071773463 |
| Catalase                                                                    | IPI00231742 | 60 kDa  | Ref | 0.1 | 1.071773463 |
| Heat shock protein beta-1                                                   | IPI00201586 | 23 kDa  | Ref | 0.1 | 1.071773463 |
| ras GTPase-activating-like protein IQGAP1                                   | IPI00365769 | 189 kDa | Ref | 0.1 | 1.071773463 |
| Annexin A4, isoform CRA_a                                                   | IPI00231968 | 36 kDa  | Ref | 0.1 | 1.071773463 |
| Serine (Or cysteine) peptidase inhibitor, clade B, member 6a, isoform CRA_a | IPI00782070 | 43 kDa  | Ref | 0.1 | 1.071773463 |
| Ubiquitin-40S ribosomal protein S27a                                        | IPI00190240 | 18 kDa  | Ref | 0.1 | 1.071773463 |
| Lamin C2                                                                    | IPI00188879 | 53 kDa  | Ref | 0.1 | 1.071773463 |

|                                            |                 |        |         |     |                 |
|--------------------------------------------|-----------------|--------|---------|-----|-----------------|
| Elongation factor 1-alpha 1                | IPI001953<br>72 | 50 kDa | Re<br>f | 0.1 | 1.07177346<br>3 |
| Peroxiredoxin-2                            | IPI002015<br>61 | 22 kDa | Re<br>f | 0.1 | 1.07177346<br>3 |
| Alcohol dehydrogenase [NADP+]              | IPI002308<br>59 | 37 kDa | Re<br>f | 0.1 | 1.07177346<br>3 |
| Superoxide dismutase [Cu-Zn]               | IPI002316<br>43 | 16 kDa | Re<br>f | 0.1 | 1.07177346<br>3 |
| Glutathione peroxidase 1                   | IPI001923<br>01 | 22 kDa | Re<br>f | 0.1 | 1.07177346<br>3 |
| Basal cell adhesion molecule               | IPI001923<br>10 | 68 kDa | Re<br>f | 0.1 | 1.07177346<br>3 |
| Uncharacterized protein                    | IPI003707<br>05 | 81 kDa | Re<br>f | 0.1 | 1.07177346<br>3 |
| Adenine phosphoribosyltransferase          | IPI009509<br>65 | 20 kDa | Re<br>f | 0.1 | 1.07177346<br>3 |
| Malate dehydrogenase, cytoplasmic          | IPI001987<br>17 | 36 kDa | Re<br>f | 0.1 | 1.07177346<br>3 |
| Nucleolin, isoform CRA_c                   | IPI002318<br>27 | 77 kDa | Re<br>f | 0.1 | 1.07177346<br>3 |
| Endoplasmic reticulum resident protein 29  | IPI002071<br>84 | 29 kDa | Re<br>f | 0.1 | 1.07177346<br>3 |
| Aspartate aminotransferase, mitochondrial  | IPI002109<br>20 | 47 kDa | Re<br>f | 0.1 | 1.07177346<br>3 |
| Dynactin subunit 2                         | IPI002130<br>15 | 44 kDa | Re<br>f | 0.1 | 1.07177346<br>3 |
| Ras-related protein Rab-7a                 | IPI002155<br>64 | 24 kDa | Re<br>f | 0.1 | 1.07177346<br>3 |
| Rab GDP dissociation inhibitor alpha       | IPI003249<br>86 | 51 kDa | Re<br>f | 0.1 | 1.07177346<br>3 |
| Enoyl-CoA delta isomerase 1, mitochondrial | IPI002155<br>74 | 32 kDa | Re<br>f | 0.1 | 1.07177346<br>3 |
| Histone H1.2                               | IPI002316<br>50 | 22 kDa | Re<br>f | 0.1 | 1.07177346<br>3 |
| actin-related protein 3B                   | IPI003581<br>27 | 48 kDa | Re<br>f | 0.1 | 1.07177346<br>3 |
| Stress-70 protein, mitochondrial           | IPI003632<br>65 | 74 kDa | Re<br>f | 0.1 | 1.07177346<br>3 |
| Vimentin                                   | IPI002309<br>41 | 54 kDa | Re<br>f | 0.2 | 1.14869835<br>5 |
| Isoform Short of Annexin A2                | IPI003251<br>46 | 39 kDa | Re<br>f | 0.2 | 1.14869835<br>5 |
| Purine nucleoside phosphorylase            | IPI008706<br>31 | 32 kDa | Re<br>f | 0.2 | 1.14869835<br>5 |

|                                                                                 |                 |         |         |     |                 |
|---------------------------------------------------------------------------------|-----------------|---------|---------|-----|-----------------|
| Hnrpk protein                                                                   | IPI001949<br>74 | 51 kDa  | Re<br>f | 0.2 | 1.14869835<br>5 |
| Isoform M2 of Pyruvate kinase<br>isozymes M1/M2                                 | IPI003391<br>97 | 58 kDa  | Re<br>f | 0.2 | 1.14869835<br>5 |
| Dipeptidase 1                                                                   | IPI003276<br>97 | 46 kDa  | Re<br>f | 0.2 | 1.14869835<br>5 |
| Alpha-enolase                                                                   | IPI004648<br>15 | 47 kDa  | Re<br>f | 0.2 | 1.14869835<br>5 |
| Elongation factor 2                                                             | IPI002032<br>14 | 95 kDa  | Re<br>f | 0.2 | 1.14869835<br>5 |
| Glutathione S-transferase (Fragment)                                            | IPI002311<br>50 | 26 kDa  | Re<br>f | 0.2 | 1.14869835<br>5 |
| Uncharacterized protein (Fragment)                                              | IPI003648<br>58 | 100 kDa | Re<br>f | 0.2 | 1.14869835<br>5 |
| EH domain-containing protein 1                                                  | IPI003603<br>40 | 61 kDa  | Re<br>f | 0.2 | 1.14869835<br>5 |
| Uncharacterized protein                                                         | IPI008864<br>70 | 28 kDa  | Re<br>f | 0.2 | 1.14869835<br>5 |
| Ras-related protein Rap-1b                                                      | IPI003633<br>95 | 21 kDa  | Re<br>f | 0.2 | 1.14869835<br>5 |
| Isoform B0b of Heterogeneous nuclear<br>ribonucleoproteins A2/B1                | IPI002129<br>69 | 34 kDa  | Re<br>f | 0.2 | 1.14869835<br>5 |
| Protein phosphatase 2 (Formerly 2A),<br>regulatory subunit A, alpha isoform     | IPI003654<br>23 | 65 kDa  | Re<br>f | 0.2 | 1.14869835<br>5 |
| Biliverdin reductase B (Flavin reductase<br>(NADPH)) (Predicted), isoform CRA_b | IPI003926<br>76 | 22 kDa  | Re<br>f | 0.2 | 1.14869835<br>5 |
| Ac2-048                                                                         | IPI003823<br>00 | 34 kDa  | Re<br>f | 0.2 | 1.14869835<br>5 |
| Keratin, type II cytoskeletal 7                                                 | IPI004217<br>88 | 51 kDa  | Re<br>f | 0.2 | 1.14869835<br>5 |
| Retinol-binding protein 1                                                       | IPI002318<br>25 | 16 kDa  | Re<br>f | 0.2 | 1.14869835<br>5 |
| SEC14-like protein 3                                                            | IPI002089<br>39 | 46 kDa  | Re<br>f | 0.3 | 1.23114441<br>3 |
| Uncharacterized protein                                                         | IPI001900<br>88 | 90 kDa  | Re<br>f | 0.3 | 1.23114441<br>3 |
| Creatine kinase B-type                                                          | IPI004702<br>88 | 43 kDa  | Re<br>f | 0.3 | 1.23114441<br>3 |
| collagen, type VI, alpha 2                                                      | IPI003728<br>39 | 110 kDa | Re<br>f | 0.3 | 1.23114441<br>3 |
| Xanthine dehydrogenase/oxidase                                                  | IPI002316<br>94 | 146 kDa | Re<br>f | 0.3 | 1.23114441<br>3 |
| Hemopexin                                                                       | IPI001955<br>16 | 51 kDa  | Re<br>f | 0.3 | 1.23114441<br>3 |

|                                                         |                 |         |         |     |                 |
|---------------------------------------------------------|-----------------|---------|---------|-----|-----------------|
| Transglutaminase 2, C polypeptide                       | IPI002051<br>35 | 77 kDa  | Re<br>f | 0.3 | 1.23114441<br>3 |
| GPI-anchored ceruloplasmin                              | IPI003258<br>47 | 124 kDa | Re<br>f | 0.3 | 1.23114441<br>3 |
| Isoform 1 of Tropomyosin alpha-3 chain                  | IPI003722<br>59 | 29 kDa  | Re<br>f | 0.3 | 1.23114441<br>3 |
| 78 kDa glucose-regulated protein                        | IPI002066<br>24 | 72 kDa  | Re<br>f | 0.3 | 1.23114441<br>3 |
| Vitamin D-binding protein                               | IPI001940<br>97 | 54 kDa  | Re<br>f | 0.3 | 1.23114441<br>3 |
| Isoform PYBP1 of Polypyrimidine tract-binding protein 1 | IPI002315<br>55 | 57 kDa  | Re<br>f | 0.3 | 1.23114441<br>3 |
| Nucleoside diphosphate kinase B                         | IPI003251<br>89 | 17 kDa  | Re<br>f | 0.3 | 1.23114441<br>3 |
| cytochrome P450 2B2                                     | IPI001932<br>34 | 57 kDa  | Re<br>f | 0.3 | 1.23114441<br>3 |
| Calreticulin                                            | IPI001917<br>28 | 48 kDa  | Re<br>f | 0.3 | 1.23114441<br>3 |
| Isoform B23.1 of Nucleophosmin                          | IPI001975<br>53 | 33 kDa  | Re<br>f | 0.3 | 1.23114441<br>3 |
| Isovaleryl-CoA dehydrogenase, mitochondrial             | IPI001937<br>16 | 46 kDa  | Re<br>f | 0.3 | 1.23114441<br>3 |
| Rho GDP-dissociation inhibitor 1                        | IPI001969<br>94 | 23 kDa  | Re<br>f | 0.3 | 1.23114441<br>3 |
| Dipeptidyl peptidase 4                                  | IPI002084<br>22 | 88 kDa  | Re<br>f | 0.3 | 1.23114441<br>3 |
| RT1 class I histocompatibility antigen, AA alpha chain  | IPI003820<br>98 | 42 kDa  | Re<br>f | 0.3 | 1.23114441<br>3 |
| Uncharacterized protein                                 | IPI003594<br>91 | 92 kDa  | Re<br>f | 0.3 | 1.23114441<br>3 |
| Uncharacterized protein                                 | IPI003706<br>54 | 29 kDa  | Re<br>f | 0.3 | 1.23114441<br>3 |
| Fibulin-5                                               | IPI003261<br>79 | 50 kDa  | Re<br>f | 0.3 | 1.23114441<br>3 |
| Moesin                                                  | IPI002123<br>14 | 68 kDa  | Re<br>f | 0.4 | 1.31950791<br>1 |
| LOC367586 protein                                       | IPI003613<br>46 | 51 kDa  | Re<br>f | 0.4 | 1.31950791<br>1 |
| Annexin A1                                              | IPI002316<br>15 | 39 kDa  | Re<br>f | 0.4 | 1.31950791<br>1 |
| Uncharacterized protein                                 | IPI009483<br>84 | 146 kDa | Re<br>f | 0.4 | 1.31950791<br>1 |
| Phosphoglycerate mutase 1                               | IPI004214<br>28 | 29 kDa  | Re<br>f | 0.4 | 1.31950791<br>1 |



|                                                                |                 |         |         |     |                 |
|----------------------------------------------------------------|-----------------|---------|---------|-----|-----------------|
| UDP-glucose:glycoprotein<br>glucosyltransferase 1              | IPI002055<br>19 | 176 kDa | Re<br>f | 0.4 | 1.31950791<br>1 |
| Cysteine-rich protein 2                                        | IPI002003<br>52 | 23 kDa  | Re<br>f | 0.4 | 1.31950791<br>1 |
| Inter-alpha-trypsin inhibitor heavy<br>chain H3                | IPI003269<br>84 | 99 kDa  | Re<br>f | 0.4 | 1.31950791<br>1 |
| Glutathione S-transferase Mu 1                                 | IPI002316<br>39 | 26 kDa  | Re<br>f | 0.4 | 1.31950791<br>1 |
| collagen, type IV, alpha 2                                     | IPI003653<br>80 | 163 kDa | Re<br>f | 0.4 | 1.31950791<br>1 |
| Carboxylesterase 3                                             | IPI003269<br>72 | 62 kDa  | Re<br>f | 0.5 | 1.41421356<br>2 |
| GF20391-like isoform 1                                         | IPI009580<br>96 | 25 kDa  | Re<br>f | 0.5 | 1.41421356<br>2 |
| Serpina3n-like protein                                         | IPI002110<br>75 | 48 kDa  | Re<br>f | 0.5 | 1.41421356<br>2 |
| Isoform 1 of Endoplasmin                                       | IPI003659<br>85 | 93 kDa  | Re<br>f | 0.5 | 1.41421356<br>2 |
| Protein S100-A9                                                | IPI002312<br>62 | 13 kDa  | Re<br>f | 0.5 | 1.41421356<br>2 |
| Myosin regulatory light chain 12B                              | IPI004216<br>25 | 20 kDa  | Re<br>f | 0.6 | 1.5157165<br>67 |
| Serine (Or cysteine) peptidase inhibitor,<br>clade B, member 9 | IPI003648<br>90 | 42 kDa  | Re<br>f | 0.6 | 1.5157165<br>67 |
| Septin-2                                                       | IPI002083<br>04 | 42 kDa  | Re<br>f | 0.6 | 1.5157165<br>67 |
| T-complex protein 1 subunit delta                              | IPI003371<br>68 | 58 kDa  | Re<br>f | 0.6 | 1.5157165<br>67 |
| Uncharacterized protein                                        | IPI005595<br>83 | 29 kDa  | Re<br>f | 0.6 | 1.5157165<br>67 |
| Uncharacterized protein (Fragment)                             | IPI010164<br>79 | 375 kDa | Re<br>f | 0.7 | 1.6245047<br>93 |
| Ubiquitin-like modifier-activating<br>enzyme 1                 | IPI003683<br>47 | 118 kDa | Re<br>f | 0.8 | 1.7411011<br>27 |
| Electron transfer flavoprotein subunit<br>alpha, mitochondrial | IPI002053<br>32 | 35 kDa  | Re<br>f | 0.8 | 1.7411011<br>27 |
| LMO7b                                                          | IPI004213<br>45 | 157 kDa | Re<br>f | 0.9 | 1.8660659<br>83 |

S4 Table Analyzed proteomics parameters of lung tissue of Bufei Jianpi formula-treated rats

| Identified Proteins                                         | Accession Number | Molecular Weight | B   | log <sub>2</sub> (B/D) | ratio (B/D) |
|-------------------------------------------------------------|------------------|------------------|-----|------------------------|-------------|
| Ras homolog gene family, member C                           | IPI00191114      | 22 kDa           | Ref | -1                     | 0.5         |
| Tubulin alpha-1A chain                                      | IPI00189795      | 50 kDa           | Ref | -0.6                   | 0.65975     |
| Electron transfer flavoprotein subunit alpha, mitochondrial | IPI00205332      | 35 kDa           | Ref | -0.6                   | 0.65975     |
| actin-related protein 3B                                    | IPI00358127      | 48 kDa           | Ref | -0.6                   | 0.65975     |
| Pgm2 protein                                                | IPI00361827      | 69 kDa           | Ref | -0.6                   | 0.65975     |
| Uncharacterized protein (Fragment)                          | IPI00364858      | 100 kDa          | Ref | -0.6                   | 0.65975     |
| Serine (Or cysteine) peptidase inhibitor, clade B, member 9 | IPI00364890      | 42 kDa           | Ref | -0.6                   | 0.65975     |
| Ubiquitin-like modifier-activating enzyme 1                 | IPI00368347      | 118 kDa          | Ref | -0.6                   | 0.65975     |
| Keratin, type I cytoskeletal 18                             | IPI00480679      | 48 kDa           | Ref | -0.6                   | 0.65975     |
| GF20391-like isoform 1                                      | IPI00958096      | 25 kDa           | Ref | -0.6                   | 0.65975     |
| Uncharacterized protein                                     | IPI00191919      | 77 kDa           | Ref | -0.5                   | 0.707107    |
| Moesin                                                      | IPI00212314      | 68 kDa           | Ref | -0.5                   | 0.707107    |
| Alcohol dehydrogenase [NADP+]                               | IPI00230859      | 37 kDa           | Ref | -0.5                   | 0.707107    |
| Superoxide dismutase [Cu-Zn]                                | IPI00231643      | 16 kDa           | Ref | -0.5                   | 0.707107    |
| collagen, type IV, alpha 2                                  | IPI00365380      | 163 kDa          | Ref | -0.5                   | 0.707107    |
| laminin, gamma 2                                            | IPI00393413      | 131 kDa          | Ref | -0.5                   | 0.707107    |
| Uncharacterized protein (Fragment)                          | IPI01016479      | 375 kDa          | Ref | -0.5                   | 0.707107    |
| Isovaleryl-CoA dehydrogenase, mitochondrial                 | IPI00193716      | 46 kDa           | Ref | -0.4                   | 0.757858    |
| Transitional endoplasmic reticulum ATPase                   | IPI00212014      | 89 kDa           | Ref | -0.4                   | 0.757858    |

|                                                          |           |        |    |      |        |
|----------------------------------------------------------|-----------|--------|----|------|--------|
| GPI-anchored ceruloplasmin                               | IPI003258 | 124    | Re | -0.4 | 0.7578 |
|                                                          | 47        | kDa    | f  |      | 58     |
| collagen, type VI, alpha 2                               | IPI003728 | 110    | Re | -0.4 | 0.7578 |
|                                                          | 39        | kDa    | f  |      | 58     |
| Phosphoglycerate mutase 1                                | IPI004214 | 29 kDa | Re | -0.4 | 0.7578 |
|                                                          | 28        |        | f  |      | 58     |
| Lamin C2                                                 | IPI001888 | 53 kDa | Re | -0.3 | 0.8122 |
|                                                          | 79        |        | f  |      | 52     |
| Isoform 1 of Alpha-1B-glycoprotein                       | IPI001890 | 56 kDa | Re | -0.3 | 0.8122 |
|                                                          | 58        |        | f  |      | 52     |
| Cysteine-rich protein 2                                  | IPI002003 | 23 kDa | Re | -0.3 | 0.8122 |
|                                                          | 52        |        | f  |      | 52     |
| Uncharacterized protein                                  | IPI002026 | 87 kDa | Re | -0.3 | 0.8122 |
|                                                          | 51        |        | f  |      | 52     |
| Isoform PYBP1 of Polypyrimidine tract-binding protein 1  | IPI002315 | 57 kDa | Re | -0.3 | 0.8122 |
|                                                          | 55        |        | f  |      | 52     |
| Annexin A1                                               | IPI002316 | 39 kDa | Re | -0.3 | 0.8122 |
|                                                          | 15        |        | f  |      | 52     |
| Nucleolin, isoform CRA_c                                 | IPI002318 | 77 kDa | Re | -0.3 | 0.8122 |
|                                                          | 27        |        | f  |      | 52     |
| Guanine nucleotide-binding protein G(i) subunit alpha-2  | IPI002319 | 41 kDa | Re | -0.3 | 0.8122 |
|                                                          | 25        |        | f  |      | 52     |
| ADP/ATP translocase 1                                    | IPI002319 | 33 kDa | Re | -0.3 | 0.8122 |
|                                                          | 27        |        | f  |      | 52     |
| Annexin A4, isoform CRA_a                                | IPI002319 | 36 kDa | Re | -0.3 | 0.8122 |
|                                                          | 68        |        | f  |      | 52     |
| Nucleoside diphosphate kinase B                          | IPI003251 | 17 kDa | Re | -0.3 | 0.8122 |
|                                                          | 89        |        | f  |      | 52     |
| Uncharacterized protein                                  | IPI003594 | 92 kDa | Re | -0.3 | 0.8122 |
|                                                          | 91        |        | f  |      | 52     |
| Isoform 1 of Endoplasmin                                 | IPI003659 | 93 kDa | Re | -0.3 | 0.8122 |
|                                                          | 85        |        | f  |      | 52     |
| LMO7b                                                    | IPI004213 | 157    | Re | -0.3 | 0.8122 |
|                                                          | 45        | kDa    | f  |      | 52     |
| Myosin regulatory light chain 12B                        | IPI004216 | 20 kDa | Re | -0.3 | 0.8122 |
|                                                          | 25        |        | f  |      | 52     |
| Tubulin polymerization-promoting protein family member 3 | IPI001878 | 19 kDa | Re | -0.2 | 0.8705 |
|                                                          | 57        |        | f  |      | 51     |
| Uncharacterized protein                                  | IPI001900 | 90 kDa | Re | -0.2 | 0.8705 |
|                                                          | 88        |        | f  |      | 51     |
| Calreticulin                                             | IPI001917 | 48 kDa | Re | -0.2 | 0.8705 |
|                                                          | 28        |        | f  |      | 51     |
| Isoform B23.1 of Nucleophosmin                           | IPI001975 | 33 kDa | Re | -0.2 | 0.8705 |
|                                                          | 53        |        | f  |      | 51     |

|                                                         |           |        |    |      |        |
|---------------------------------------------------------|-----------|--------|----|------|--------|
| Fatty acid synthase                                     | IPI002006 | 273    | Re | -0.2 | 0.8705 |
|                                                         | 61        | kDa    | f  |      | 51     |
| Isoform 1 of Heterogeneous nuclear ribonucleoprotein D0 | IPI002010 | 38 kDa | Re | -0.2 | 0.8705 |
|                                                         | 32        |        | f  |      | 51     |
| Plasmalemma vesicle-associated protein                  | IPI002045 | 50 kDa | Re | -0.2 | 0.8705 |
|                                                         | 04        |        | f  |      | 51     |
| UDP-glucose:glycoprotein glucosyltransferase 1          | IPI002055 | 176    | Re | -0.2 | 0.8705 |
|                                                         | 19        | kDa    | f  |      | 51     |
| Endoplasmic reticulum resident protein 29               | IPI002071 | 29 kDa | Re | -0.2 | 0.8705 |
|                                                         | 84        |        | f  |      | 51     |
| Carbonic anhydrase 2                                    | IPI002307 | 29 kDa | Re | -0.2 | 0.8705 |
|                                                         | 87        |        | f  |      | 51     |
| Xanthine dehydrogenase/oxidase                          | IPI002316 | 146    | Re | -0.2 | 0.8705 |
|                                                         | 94        | kDa    | f  |      | 51     |
| 14-3-3 protein zeta/delta                               | IPI003248 | 28 kDa | Re | -0.2 | 0.8705 |
|                                                         | 93        |        | f  |      | 51     |
| Isoform Short of Annexin A2                             | IPI003251 | 39 kDa | Re | -0.2 | 0.8705 |
|                                                         | 46        |        | f  |      | 51     |
| T-complex protein 1 subunit delta                       | IPI003371 | 58 kDa | Re | -0.2 | 0.8705 |
|                                                         | 68        |        | f  |      | 51     |
| RCG61183, isoform CRA_b                                 | IPI003621 | 78 kDa | Re | -0.2 | 0.8705 |
|                                                         | 06        |        | f  |      | 51     |
| laminin, gamma 1                                        | IPI003638 | 177    | Re | -0.2 | 0.8705 |
|                                                         | 49        | kDa    | f  |      | 51     |
| Myosin light polypeptide 6                              | IPI003659 | 17 kDa | Re | -0.2 | 0.8705 |
|                                                         | 44        |        | f  |      | 51     |
| Uncharacterized protein                                 | IPI003674 | 229    | Re | -0.2 | 0.8705 |
|                                                         | 79        | kDa    | f  |      | 51     |
| Uncharacterized protein                                 | IPI003708 | 60 kDa | Re | -0.2 | 0.8705 |
|                                                         | 15        |        | f  |      | 51     |
| RT1 class I histocompatibility antigen, AA alpha chain  | IPI003820 | 42 kDa | Re | -0.2 | 0.8705 |
|                                                         | 98        |        | f  |      | 51     |
| ATP synthase subunit alpha, mitochondrial               | IPI003969 | 60 kDa | Re | -0.2 | 0.8705 |
|                                                         | 10        |        | f  |      | 51     |
| Desmin                                                  | IPI004215 | 53 kDa | Re | -0.2 | 0.8705 |
|                                                         | 17        |        | f  |      | 51     |
| Complement C3 (Fragment)                                | IPI004806 | 186    | Re | -0.2 | 0.8705 |
|                                                         | 39        | kDa    | f  |      | 51     |
| 60S acidic ribosomal protein P2                         | IPI001888 | 12 kDa | Re | -0.1 | 0.9330 |
|                                                         | 04        |        | f  |      | 33     |
| Actin, cytoplasmic 1                                    | IPI001898 | 42 kDa | Re | -0.1 | 0.9330 |
|                                                         | 19        |        | f  |      | 33     |
| Serum albumin                                           | IPI001917 | 69 kDa | Re | -0.1 | 0.9330 |
|                                                         | 37        |        | f  |      | 33     |

|                                                                          |                 |         |         |      |              |
|--------------------------------------------------------------------------|-----------------|---------|---------|------|--------------|
| Hnrpk protein                                                            | IPI001949<br>74 | 51 kDa  | Re<br>f | -0.1 | 0.9330<br>33 |
| Hemopexin                                                                | IPI001955<br>16 | 51 kDa  | Re<br>f | -0.1 | 0.9330<br>33 |
| Heat shock 70 kDa protein 1A/1B                                          | IPI001967<br>51 | 70 kDa  | Re<br>f | -0.1 | 0.9330<br>33 |
| Isoform 1 of Tropomyosin alpha-1 chain                                   | IPI001978<br>88 | 33 kDa  | Re<br>f | -0.1 | 0.9330<br>33 |
| Polymerase I and transcript release factor                               | IPI002013<br>00 | 44 kDa  | Re<br>f | -0.1 | 0.9330<br>33 |
| Heat shock protein beta-1                                                | IPI002015<br>86 | 23 kDa  | Re<br>f | -0.1 | 0.9330<br>33 |
| Vesicle amine transport protein 1 homolog (T californica), isoform CRA_a | IPI002019<br>69 | 43 kDa  | Re<br>f | -0.1 | 0.9330<br>33 |
| Transglutaminase 2, C polypeptide                                        | IPI002051<br>35 | 77 kDa  | Re<br>f | -0.1 | 0.9330<br>33 |
| Keratin, type I cytoskeletal 19                                          | IPI002070<br>14 | 45 kDa  | Re<br>f | -0.1 | 0.9330<br>33 |
| Septin-2                                                                 | IPI002083<br>04 | 42 kDa  | Re<br>f | -0.1 | 0.9330<br>33 |
| Uncharacterized protein                                                  | IPI002118<br>13 | 233 kDa | Re<br>f | -0.1 | 0.9330<br>33 |
| Laminin subunit beta-2                                                   | IPI002128<br>68 | 196 kDa | Re<br>f | -0.1 | 0.9330<br>33 |
| Dynactin subunit 2                                                       | IPI002130<br>15 | 44 kDa  | Re<br>f | -0.1 | 0.9330<br>33 |
| ATP-citrate synthase isoform 1                                           | IPI002146<br>65 | 121 kDa | Re<br>f | -0.1 | 0.9330<br>33 |
| Glutathione S-transferase P                                              | IPI002312<br>29 | 23 kDa  | Re<br>f | -0.1 | 0.9330<br>33 |
| C9 protein                                                               | IPI002314<br>23 | 64 kDa  | Re<br>f | -0.1 | 0.9330<br>33 |
| Protein disulfide-isomerase A3                                           | IPI003247<br>41 | 57 kDa  | Re<br>f | -0.1 | 0.9330<br>33 |
| Alpha-1-macroglobulin                                                    | IPI003261<br>40 | 167 kDa | Re<br>f | -0.1 | 0.9330<br>33 |
| LOC367586 protein                                                        | IPI003613<br>46 | 51 kDa  | Re<br>f | -0.1 | 0.9330<br>33 |
| Actin-related protein 2                                                  | IPI003620<br>72 | 45 kDa  | Re<br>f | -0.1 | 0.9330<br>33 |
| Stress-70 protein, mitochondrial                                         | IPI003632<br>65 | 74 kDa  | Re<br>f | -0.1 | 0.9330<br>33 |
| Isoform 1 of Gelsolin                                                    | IPI003639<br>74 | 86 kDa  | Re<br>f | -0.1 | 0.9330<br>33 |

|                                                                             |           |        |    |      |        |
|-----------------------------------------------------------------------------|-----------|--------|----|------|--------|
| Vinculin                                                                    | IPI003652 | 117    | Re | -0.1 | 0.9330 |
|                                                                             | 86        | kDa    | f  |      | 33     |
| ras GTPase-activating-like protein                                          | IPI003657 | 189    | Re | -0.1 | 0.9330 |
| IQGAP1                                                                      | 69        | kDa    | f  |      | 33     |
| protein disulfide-isomerase A6                                              | IPI003659 | 49 kDa | Re | -0.1 | 0.9330 |
|                                                                             | 29        |        | f  |      | 33     |
| collagen, type VI, alpha 1                                                  | IPI003718 | 110    | Re | -0.1 | 0.9330 |
|                                                                             | 53        | kDa    | f  |      | 33     |
| destrin-like                                                                | IPI003731 | 19 kDa | Re | -0.1 | 0.9330 |
|                                                                             | 40        |        | f  |      | 33     |
| Peptidyl-prolyl cis-trans isomerase A                                       | IPI003877 | 18 kDa | Re | -0.1 | 0.9330 |
|                                                                             | 71        |        | f  |      | 33     |
| Transgelin-2                                                                | IPI005551 | 22 kDa | Re | -0.1 | 0.9330 |
|                                                                             | 71        |        | f  |      | 33     |
| Non-erythroid spectrin beta                                                 | IPI005552 | 274    | Re | -0.1 | 0.9330 |
|                                                                             | 87        | kDa    | f  |      | 33     |
| Uncharacterized protein                                                     | IPI005656 | 288    | Re | -0.1 | 0.9330 |
|                                                                             | 77        | kDa    | f  |      | 33     |
| Serine (Or cysteine) peptidase inhibitor, clade B, member 6a, isoform CRA_a | IPI007820 | 43 kDa | Re | -0.1 | 0.9330 |
|                                                                             | 70        |        | f  |      | 33     |
| Purine nucleoside phosphorylase                                             | IPI008706 | 32 kDa | Re | -0.1 | 0.9330 |
|                                                                             | 31        |        | f  |      | 33     |
| Uteroglobin                                                                 | IPI001891 | 10 kDa | Re | 0.1  | 1.0717 |
|                                                                             | 50        |        | f  |      | 73     |
| Chloride intracellular channel protein 5                                    | IPI001895 | 28 kDa | Re | 0.1  | 1.0717 |
|                                                                             | 03        |        | f  |      | 73     |
| myosin-6                                                                    | IPI001898 | 224    | Re | 0.1  | 1.0717 |
|                                                                             | 09        | kDa    | f  |      | 73     |
| Ubiquitin-40S ribosomal protein S27a                                        | IPI001902 | 18 kDa | Re | 0.1  | 1.0717 |
|                                                                             | 40        |        | f  |      | 73     |
| Glutathione peroxidase 1                                                    | IPI001923 | 22 kDa | Re | 0.1  | 1.0717 |
|                                                                             | 01        |        | f  |      | 73     |
| Elongation factor 1-alpha 1                                                 | IPI001953 | 50 kDa | Re | 0.1  | 1.0717 |
|                                                                             | 72        |        | f  |      | 73     |
| X-prolyl aminopeptidase (Aminopeptidase P) 2, membrane-bound                | IPI001976 | 76 kDa | Re | 0.1  | 1.0717 |
|                                                                             | 84        |        | f  |      | 73     |
| L-lactate dehydrogenase A chain                                             | IPI001977 | 36 kDa | Re | 0.1  | 1.0717 |
|                                                                             | 11        |        | f  |      | 73     |
| Peroxiredoxin-2                                                             | IPI002015 | 22 kDa | Re | 0.1  | 1.0717 |
|                                                                             | 61        |        | f  |      | 73     |
| Serpin H1                                                                   | IPI002047 | 47 kDa | Re | 0.1  | 1.0717 |
|                                                                             | 03        |        | f  |      | 73     |
| Isoform 1 of Fibrinogen beta chain                                          | IPI002053 | 54 kDa | Re | 0.1  | 1.0717 |
|                                                                             | 89        |        | f  |      | 73     |

|                                                               |                 |            |         |     |              |
|---------------------------------------------------------------|-----------------|------------|---------|-----|--------------|
| Citrate synthase, mitochondrial                               | IPI002069<br>77 | 52 kDa     | Re<br>f | 0.1 | 1.0717<br>73 |
| Selenium-binding protein 1                                    | IPI002080<br>26 | 53 kDa     | Re<br>f | 0.1 | 1.0717<br>73 |
| Alpha-actinin-1                                               | IPI002090<br>82 | 103<br>kDa | Re<br>f | 0.1 | 1.0717<br>73 |
| Myosin-9                                                      | IPI002091<br>13 | 226<br>kDa | Re<br>f | 0.1 | 1.0717<br>73 |
| Uncharacterized protein                                       | IPI002092<br>58 | 285<br>kDa | Re<br>f | 0.1 | 1.0717<br>73 |
| Proteasome activator complex subunit 2                        | IPI002119<br>70 | 27 kDa     | Re<br>f | 0.1 | 1.0717<br>73 |
| Cathepsin D                                                   | IPI002127<br>31 | 45 kDa     | Re<br>f | 0.1 | 1.0717<br>73 |
| Isoform B0b of Heterogeneous nuclear ribonucleoproteins A2/B1 | IPI002129<br>69 | 34 kDa     | Re<br>f | 0.1 | 1.0717<br>73 |
| Complement C4                                                 | IPI002130<br>36 | 192<br>kDa | Re<br>f | 0.1 | 1.0717<br>73 |
| Alpha-actinin-4                                               | IPI002134<br>63 | 105<br>kDa | Re<br>f | 0.1 | 1.0717<br>73 |
| Myosin light chain 4                                          | IPI002144<br>57 | 21 kDa     | Re<br>f | 0.1 | 1.0717<br>73 |
| Transgelin                                                    | IPI002311<br>96 | 23 kDa     | Re<br>f | 0.1 | 1.0717<br>73 |
| Protein S100-A9                                               | IPI002312<br>62 | 13 kDa     | Re<br>f | 0.1 | 1.0717<br>73 |
| ADP-ribosylation factor 3                                     | IPI002316<br>74 | 21 kDa     | Re<br>f | 0.1 | 1.0717<br>73 |
| Retinol-binding protein 1                                     | IPI002318<br>25 | 16 kDa     | Re<br>f | 0.1 | 1.0717<br>73 |
| Rab GDP dissociation inhibitor alpha                          | IPI003249<br>86 | 51 kDa     | Re<br>f | 0.1 | 1.0717<br>73 |
| Isoform M2 of Pyruvate kinase isozymes M1/M2                  | IPI003391<br>97 | 58 kDa     | Re<br>f | 0.1 | 1.0717<br>73 |
| Serum deprivation-response protein                            | IPI003624<br>16 | 46 kDa     | Re<br>f | 0.1 | 1.0717<br>73 |
| tensin 1                                                      | IPI003627<br>55 | 204<br>kDa | Re<br>f | 0.1 | 1.0717<br>73 |
| Uncharacterized protein                                       | IPI003629<br>31 | 34 kDa     | Re<br>f | 0.1 | 1.0717<br>73 |
| Keratin, type II cytoskeletal 8                               | IPI003895<br>71 | 54 kDa     | Re<br>f | 0.1 | 1.0717<br>73 |
| Tubulin beta-2C chain                                         | IPI004005<br>73 | 50 kDa     | Re<br>f | 0.1 | 1.0717<br>73 |

|                                                 |                 |            |         |     |              |
|-------------------------------------------------|-----------------|------------|---------|-----|--------------|
| Keratin, type II cytoskeletal 7                 | IPI004217<br>88 | 51 kDa     | Re<br>f | 0.1 | 1.0717<br>73 |
| Creatine kinase B-type                          | IPI004702<br>88 | 43 kDa     | Re<br>f | 0.1 | 1.0717<br>73 |
| Heat shock protein HSP 90-beta                  | IPI004715<br>84 | 83 kDa     | Re<br>f | 0.1 | 1.0717<br>73 |
| myosin, heavy chain 11, smooth muscle isoform 3 | IPI007641<br>67 | 228<br>kDa | Re<br>f | 0.1 | 1.0717<br>73 |
| Dihydropyrimidinase-related protein 2           | IPI008701<br>12 | 62 kDa     | Re<br>f | 0.1 | 1.0717<br>73 |
| Uncharacterized protein                         | IPI009483<br>84 | 146<br>kDa | Re<br>f | 0.1 | 1.0717<br>73 |
| Adenine phosphoribosyltransferase               | IPI009509<br>65 | 20 kDa     | Re<br>f | 0.1 | 1.0717<br>73 |
| Filamin, alpha (Predicted), isoform CRA_a       | IPI009517<br>91 | 280<br>kDa | Re<br>f | 0.1 | 1.0717<br>73 |
| Isoform 2 of Tropomyosin beta chain             | IPI001877<br>31 | 33 kDa     | Re<br>f | 0.2 | 1.1486<br>98 |
| Basal cell adhesion molecule                    | IPI001923<br>10 | 68 kDa     | Re<br>f | 0.2 | 1.1486<br>98 |
| Vitamin D-binding protein                       | IPI001940<br>97 | 54 kDa     | Re<br>f | 0.2 | 1.1486<br>98 |
| Aldehyde dehydrogenase, mitochondrial           | IPI001977<br>70 | 56 kDa     | Re<br>f | 0.2 | 1.1486<br>98 |
| Pincher                                         | IPI002002<br>71 | 61 kDa     | Re<br>f | 0.2 | 1.1486<br>98 |
| Zero beta-1 globin                              | IPI002071<br>46 | 16 kDa     | Re<br>f | 0.2 | 1.1486<br>98 |
| Plastin-3                                       | IPI002102<br>34 | 71 kDa     | Re<br>f | 0.2 | 1.1486<br>98 |
| EH domain-containing protein 2                  | IPI002114<br>48 | 61 kDa     | Re<br>f | 0.2 | 1.1486<br>98 |
| Protein DJ-1                                    | IPI002125<br>23 | 20 kDa     | Re<br>f | 0.2 | 1.1486<br>98 |
| Isoform 1 of Murinoglobulin-1                   | IPI002126<br>66 | 165<br>kDa | Re<br>f | 0.2 | 1.1486<br>98 |
| Enoyl-CoA delta isomerase 1, mitochondrial      | IPI002155<br>74 | 32 kDa     | Re<br>f | 0.2 | 1.1486<br>98 |
| Phosphatidylethanolamine-binding protein 1      | IPI002309<br>37 | 21 kDa     | Re<br>f | 0.2 | 1.1486<br>98 |
| Peroxiredoxin-6                                 | IPI002312<br>60 | 25 kDa     | Re<br>f | 0.2 | 1.1486<br>98 |
| Profilin-1                                      | IPI002313<br>58 | 15 kDa     | Re<br>f | 0.2 | 1.1486<br>98 |



|                                                                              |             |         |     |     |          |
|------------------------------------------------------------------------------|-------------|---------|-----|-----|----------|
| Isoform 1 of Cell division control protein 42 homolog                        | IPI00285606 | 21 kDa  | Ref | 0.2 | 1.148698 |
| Fibulin-5                                                                    | IPI00326179 | 50 kDa  | Ref | 0.2 | 1.148698 |
| Inter-alpha-trypsin inhibitor heavy chain H3                                 | IPI00326984 | 99 kDa  | Ref | 0.2 | 1.148698 |
| Ac2-048                                                                      | IPI00382300 | 34 kDa  | Ref | 0.2 | 1.148698 |
| Alpha-enolase                                                                | IPI00464815 | 47 kDa  | Ref | 0.2 | 1.148698 |
| Uncharacterized protein                                                      | IPI00204261 | 97 kDa  | Ref | 0.3 | 1.231144 |
| 78 kDa glucose-regulated protein                                             | IPI00206624 | 72 kDa  | Ref | 0.3 | 1.231144 |
| Aspartate aminotransferase, mitochondrial                                    | IPI00210920 | 47 kDa  | Ref | 0.3 | 1.231144 |
| Peroxiredoxin-1                                                              | IPI00211779 | 22 kDa  | Ref | 0.3 | 1.231144 |
| Ras-related protein Rab-7a                                                   | IPI00215564 | 24 kDa  | Ref | 0.3 | 1.231144 |
| Fructose-bisphosphate aldolase A                                             | IPI00231734 | 39 kDa  | Ref | 0.3 | 1.231144 |
| Catalase                                                                     | IPI00231742 | 60 kDa  | Ref | 0.3 | 1.231144 |
| Hemoglobin subunit alpha-1/2                                                 | IPI00287835 | 15 kDa  | Ref | 0.3 | 1.231144 |
| Pulmonary surfactant-associated protein A                                    | IPI00327502 | 26 kDa  | Ref | 0.3 | 1.231144 |
| Dipeptidase 1                                                                | IPI00327697 | 46 kDa  | Ref | 0.3 | 1.231144 |
| RCG39189, isoform CRA_a                                                      | IPI00364621 | 54 kDa  | Ref | 0.3 | 1.231144 |
| Calpain-2 catalytic subunit                                                  | IPI00388249 | 80 kDa  | Ref | 0.3 | 1.231144 |
| Biliverdin reductase B (Flavin reductase (NADPH)) (Predicted), isoform CRA_b | IPI00392676 | 22 kDa  | Ref | 0.3 | 1.231144 |
| Uncharacterized protein                                                      | IPI00781155 | 37 kDa  | Ref | 0.3 | 1.231144 |
| Uncharacterized protein                                                      | IPI00199867 | 95 kDa  | Ref | 0.4 | 1.319508 |
| Cytochrome P450 4B1                                                          | IPI00206129 | 59 kDa  | Ref | 0.4 | 1.319508 |
| Uncharacterized protein                                                      | IPI00231136 | 137 kDa | Ref | 0.4 | 1.319508 |

|                                                                             |                 |            |         |     |              |
|-----------------------------------------------------------------------------|-----------------|------------|---------|-----|--------------|
| Glutathione S-transferase Mu 1                                              | IPI002316<br>39 | 26 kDa     | Re<br>f | 0.4 | 1.3195<br>08 |
| Histone H1.2                                                                | IPI002316<br>50 | 22 kDa     | Re<br>f | 0.4 | 1.3195<br>08 |
| Isoform 1 of Tropomyosin alpha-3 chain                                      | IPI003722<br>59 | 29 kDa     | Re<br>f | 0.4 | 1.3195<br>08 |
| Uncharacterized protein                                                     | IPI001900<br>20 | 115<br>kDa | Re<br>f | 0.5 | 1.4142<br>14 |
| Protein disulfide-isomerase                                                 | IPI001988<br>87 | 57 kDa     | Re<br>f | 0.5 | 1.4142<br>14 |
| Trifunctional enzyme subunit alpha,<br>mitochondrial                        | IPI002126<br>22 | 83 kDa     | Re<br>f | 0.5 | 1.4142<br>14 |
| Proteasome subunit beta type-3                                              | IPI002148<br>89 | 23 kDa     | Re<br>f | 0.5 | 1.4142<br>14 |
| Myosin-Ic                                                                   | IPI003938<br>67 | 120<br>kDa | Re<br>f | 0.5 | 1.4142<br>14 |
| LOC500183 protein                                                           | IPI005683<br>89 | 26 kDa     | Re<br>f | 0.5 | 1.4142<br>14 |
| Uncharacterized protein                                                     | IPI008864<br>70 | 28 kDa     | Re<br>f | 0.5 | 1.4142<br>14 |
| cytochrome P450 2B2                                                         | IPI001932<br>34 | 57 kDa     | Re<br>f | 0.6 | 1.5157<br>2  |
| Uncharacterized protein                                                     | IPI002102<br>24 | 309<br>kDa | Re<br>f | 0.6 | 1.5157<br>2  |
| Prohibitin                                                                  | IPI002117<br>56 | 30 kDa     | Re<br>f | 0.6 | 1.5157<br>2  |
| Carbonic anhydrase 1                                                        | IPI003609<br>30 | 28 kDa     | Re<br>f | 0.6 | 1.5157<br>2  |
| Uncharacterized protein                                                     | IPI005595<br>83 | 29 kDa     | Re<br>f | 0.6 | 1.5157<br>2  |
| Phosphoglycerate kinase 1                                                   | IPI002314<br>26 | 45 kDa     | Re<br>f | 0.7 | 1.6245       |
| Uncharacterized protein                                                     | IPI003707<br>05 | 81 kDa     | Re<br>f | 0.7 | 1.6245       |
| Protein phosphatase 2 (Formerly 2A),<br>regulatory subunit A, alpha isoform | IPI003654<br>23 | 65 kDa     | Re<br>f | 1   | 2            |

S5 Table the 42 overlapping proteins between COPD and BJJ-treated group proteomics measurements

| Identified Proteins (295)                                                | Accession Number | log2(B/A) | B/A    | log2(B/D) | B/D    |
|--------------------------------------------------------------------------|------------------|-----------|--------|-----------|--------|
| Carbonic anhydrase 1                                                     | IPI00189         | -0.3      | 0.8122 | -0.3      | 0.8122 |
|                                                                          | 058              |           | 52     |           | 52     |
| Zero beta-1 globin                                                       | IPI00191         | -0.1      | 0.9330 | -0.1      | 0.9330 |
|                                                                          | 737              |           | 33     |           | 33     |
| Malate dehydrogenase, mitochondrial                                      | IPI00192         | 0.1       | 1.0717 | 0.1       | 1.0717 |
|                                                                          | 301              |           | 73     |           | 73     |
| Vesicle amine transport protein 1 homolog (T californica), isoform CRA_a | IPI00192         | 0.1       | 1.0717 | 0.2       | 1.1486 |
|                                                                          | 310              |           | 73     |           | 98     |
| Heat shock 70 kDa protein 1A/1B                                          | IPI00194         | 0.3       | 1.2311 | 0.2       | 1.1486 |
|                                                                          | 097              |           | 44     |           | 98     |
| ADP/ATP translocase 1                                                    | IPI00196         | -0.1      | 0.9330 | -0.1      | 0.9330 |
|                                                                          | 751              |           | 33     |           | 33     |
| Isoform 1 of Cell division control protein 42 homolog                    | IPI00197         | -0.2      | 0.8705 | -0.1      | 0.9330 |
|                                                                          | 888              |           | 51     |           | 33     |
| Aldehyde dehydrogenase, mitochondrial                                    | IPI00201         | 0.1       | 1.0717 | 0.1       | 1.0717 |
|                                                                          | 561              |           | 73     |           | 73     |
| Trifunctional enzyme subunit alpha, mitochondrial                        | IPI00201         | -0.1      | 0.9330 | -0.1      | 0.9330 |
|                                                                          | 969              |           | 33     |           | 33     |
| chloride intracellular channel 3                                         | IPI00204         | -0.2      | 0.8705 | -0.2      | 0.8705 |
|                                                                          | 504              |           | 51     |           | 51     |
| Uncharacterized protein                                                  | IPI00205         | 0.3       | 1.2311 | -0.1      | 0.9330 |
|                                                                          | 135              |           | 44     |           | 33     |
| Alpha-actinin-1                                                          | IPI00206         | 0.3       | 1.2311 | 0.3       | 1.2311 |
|                                                                          | 624              |           | 44     |           | 44     |
| Acetyl-CoA acetyltransferase, mitochondrial                              | IPI00210         | 0.1       | 1.0717 | 0.3       | 1.2311 |
|                                                                          | 920              |           | 73     |           | 44     |
| destrin-like                                                             | IPI00212         | -0.1      | 0.9330 | -0.4      | 0.7578 |
|                                                                          | 014              |           | 33     |           | 58     |
| Desmin                                                                   | IPI00215         | 0.1       | 1.0717 | 0.3       | 1.2311 |
|                                                                          | 564              |           | 73     |           | 44     |
| inter-alpha-inhibitor H4 heavy chain                                     | IPI00230         | -0.3      | 0.8122 | -0.2      | 0.8705 |
|                                                                          | 787              |           | 52     |           | 51     |
| Fatty acid synthase                                                      | IPI00231         | 0.5       | 1.4142 | 0.1       | 1.0717 |
|                                                                          | 262              |           | 14     |           | 73     |
| Uncharacterized protein                                                  | IPI00231         | -0.1      | 0.9330 | -0.1      | 0.9330 |
|                                                                          | 423              |           | 33     |           | 33     |
| 14-3-3 protein epsilon                                                   | IPI00231         | 0.1       | 1.0717 | 0.3       | 1.2311 |
|                                                                          | 742              |           | 73     |           | 44     |

|                                               |                 |      |              |      |              |
|-----------------------------------------------|-----------------|------|--------------|------|--------------|
| Peroxiredoxin-1                               | IPI00231<br>825 | 0.2  | 1.1486<br>98 | 0.1  | 1.0717<br>73 |
| Calpain-2 catalytic subunit                   | IPI00231<br>925 | -0.5 | 0.7071<br>07 | -0.3 | 0.8122<br>52 |
| Uncharacterized protein                       | IPI00231<br>927 | -0.2 | 0.8705<br>51 | -0.3 | 0.8122<br>52 |
| Glutathione S-transferase Mu 2                | IPI00324<br>986 | 0.1  | 1.0717<br>73 | 0.1  | 1.0717<br>73 |
| Protein DJ-1                                  | IPI00326<br>140 | -0.5 | 0.7071<br>07 | -0.1 | 0.9330<br>33 |
| Polymerase I and transcript release factor    | IPI00326<br>179 | 0.3  | 1.2311<br>44 | 0.2  | 1.1486<br>98 |
| protein disulfide-isomerase A6                | IPI00327<br>697 | 0.2  | 1.1486<br>98 | 0.3  | 1.2311<br>44 |
| Carbonic anhydrase 2                          | IPI00362<br>072 | -0.2 | 0.8705<br>51 | -0.1 | 0.9330<br>33 |
| Aconitate hydratase, mitochondrial            | IPI00365<br>423 | 0.2  | 1.1486<br>98 | 1    | 2            |
| Tropomodulin 3                                | IPI00365<br>929 | -0.1 | 0.9330<br>33 | -0.1 | 0.9330<br>33 |
| Triosephosphate isomerase                     | IPI00372<br>259 | 0.3  | 1.2311<br>44 | 0.4  | 1.3195<br>08 |
| Isoform 1 of Tropomyosin alpha-1 chain        | IPI00387<br>771 | -0.1 | 0.9330<br>33 | -0.1 | 0.9330<br>33 |
| Alpha-1-antiproteinase                        | IPI00389<br>571 | 0.1  | 1.0717<br>73 | 0.1  | 1.0717<br>73 |
| Bifunctional purine biosynthesis protein PURH | IPI00392<br>676 | 0.2  | 1.1486<br>98 | 0.3  | 1.2311<br>44 |
| Isoform 2 of Tropomyosin beta chain           | IPI00400<br>573 | 0.1  | 1.0717<br>73 | 0.1  | 1.0717<br>73 |
| Pulmonary surfactant-associated protein A     | IPI00421<br>517 | -0.1 | 0.9330<br>33 | -0.2 | 0.8705<br>51 |
| Citrate synthase, mitochondrial               | IPI00421<br>788 | 0.2  | 1.1486<br>98 | 0.1  | 1.0717<br>73 |
| Fructose-bisphosphate aldolase A              | IPI00470<br>288 | 0.3  | 1.2311<br>44 | 0.1  | 1.0717<br>73 |
| Sideroflexin-3                                | IPI00480<br>679 | -0.7 | 0.615<br>57  | -0.6 | 0.659<br>75  |
| Plectin 6                                     | IPI00559<br>583 | 0.6  | 1.515<br>72  | 0.6  | 1.515<br>72  |
| Uncharacterized protein                       | IPI00886<br>470 | 0.2  | 1.1486<br>98 | 0.5  | 1.4142<br>14 |
| Annexin A5                                    | IPI00948<br>384 | 0.4  | 1.3195<br>08 | 0.1  | 1.0717<br>73 |

|                                              |                 |     |              |     |              |
|----------------------------------------------|-----------------|-----|--------------|-----|--------------|
| Transitional endoplasmic reticulum<br>ATPase | IPI00950<br>965 | 0.1 | 1.0717<br>73 | 0.1 | 1.0717<br>73 |
|----------------------------------------------|-----------------|-----|--------------|-----|--------------|

---

S6 Table. Chemical information of 175 candidate targets derived from system pharmacology

| <b>Target name</b>                                   | <b>Gene name</b> |
|------------------------------------------------------|------------------|
| Nitric oxide synthase, inducible                     | MAPK8            |
| Prostaglandin G/H synthase 1                         | POR              |
| Dopamine D1 receptor                                 | CYCS             |
| Insulin receptor                                     | GABRA6           |
| Muscarinic acetylcholine receptor M3                 | MMP1             |
| Thrombin                                             | ACPP             |
| Potassium voltage-gated channel subfamily H member 2 | OPRM1            |
| Muscarinic acetylcholine receptor M1                 | IL2              |
| Estrogen receptor                                    | PLA2G4A          |
| Androgen receptor                                    | APP              |
| D(1B) dopamine receptor                              | CTRB1            |
| Beta-1 adrenergic receptor                           | ATP5B            |
| Sodium channel protein type 5 subunit alpha          |                  |
| Peroxisome proliferator activated receptor gamma     | CHRM3            |
| Coagulation factor Xa                                | katA             |
| Apoptosis regulator Bcl-2                            | AR               |
| Muscarinic acetylcholine receptor M5                 | LDLR             |
| Arachidonate 5-lipoxygenase                          | BCL2             |
| 4-aminobutyrate aminotransferase, mitochondrial      | mvaA             |
| Prostaglandin G/H synthase 2                         | CHRNA7           |
| Nitric-oxide synthase, endothelial                   |                  |
| Alpha-2A adrenergic receptor                         | ADRA1D           |
| 5-hydroxytryptamine 1A receptor                      | ABAT             |
| 5-hydroxytryptamine receptor 3A                      | HTR2C            |
| Carbonic anhydrase II                                | penP             |
| Coagulation factor VII                               | katA             |
| Alpha-2C adrenergic receptor                         | ADRA2B           |
| Vascular endothelial growth factor receptor 2        | SLC6A3           |
| Gamma-aminobutyric-acid receptor alpha-2 subunit     | TOP1             |
| Ornithine decarboxylase                              | CHRM1            |
| Muscarinic acetylcholine receptor M4                 | LTA4H            |
| Retinoic acid receptor RXR-alpha                     | NOS2             |
| Delta-type opioid receptor                           | F10              |
| Acetylcholinesterase                                 | DHCR7            |
| CGMP-inhibited 3',5'-cyclic phosphodiesterase A      | CAT              |
| Histamine H1 receptor                                | GOT1             |
| 5-hydroxytryptamine 2A receptor                      | HTR1B            |
| Gamma-aminobutyric-acid receptor alpha-5 subunit     | HTR1A            |
| Sodium-dependent noradrenaline transporter           | EGF              |

|                                                           |        |
|-----------------------------------------------------------|--------|
| Low-density lipoprotein receptor                          | GSTP1  |
| Alpha-1A adrenergic receptor                              | AKR1B1 |
| Gamma-aminobutyric-acid receptor alpha-3 subunit          | topA   |
| Aspartate aminotransferase, cytoplasmic                   | AHR    |
| 5-hydroxytryptamine 2C receptor                           | HTR2A  |
| Progesterone receptor                                     | NQO1   |
| Muscarinic acetylcholine receptor M2                      | IL6    |
| Alpha-2B adrenergic receptor                              | ADRA2A |
| Alpha-1B adrenergic receptor                              | ADRA1A |
| Aldo-keto reductase family 1 member C3                    | AKR1C1 |
| mRNA of Protein-tyrosine phosphatase, non-receptor type 1 | IFNG   |
| Acetyl-CoA carboxylase 1                                  | ACHE   |
| 72 kDa type IV collagenase                                | CA2    |
| Sodium-dependent dopamine transporter                     | KCNH2  |
| Glutathione reductase, mitochondrial                      | ESR1   |
| Cytosolic phospholipase A2                                | PDE3A  |
| Mineralocorticoid receptor                                | HMOX1  |
| Beta-2 adrenergic receptor                                | ADRB1  |
| Tumor necrosis factor                                     | MTOR   |
| Alpha-1D adrenergic receptor                              | ADRA1B |
| Neuronal acetylcholine receptor subunit alpha-2           | MAPK1  |
| DNA topoisomerase II                                      | CCNA2  |
| Aldose reductase                                          | AKR1C3 |
| Sodium-dependent serotonin transporter                    | PGR    |
| D(2) dopamine receptor                                    | F7     |
| Epidermal growth factor receptor                          | CYP3A4 |
| Mu-type opioid receptor                                   | E      |
| Multidrug resistance-associated protein 1                 | IL1B   |
| Estrogen receptor beta                                    | DRD5   |
| Glucocorticoid receptor                                   | EGFR   |
| Gamma-aminobutyric acid receptor subunit alpha-1          | gyrB   |
| 5-hydroxytryptamine 1B receptor                           | HTR1A  |
| Maltase-glucoamylase, intestinal                          | GSK3B  |
| Dipeptidyl peptidase IV                                   | COL1A1 |
| Urokinase-type plasminogen activator                      | PPP3CA |
| Hepatocyte growth factor receptor                         | ODC1   |
| Glycogen phosphorylase, muscle form                       | fhuA   |
| Interleukin-6                                             | GSR    |
| Interstitial collagenase                                  | GSTM1  |
| Mitogen-activated protein kinase 1                        | pbsA1  |
| Serum paraoxonase/arylesterase 1                          | PPARG  |
| Cathepsin D                                               | cphA   |
| Interferon gamma                                          | GJA1   |
| Fatty acid synthase                                       | OPRD1  |

|                                                                                 |        |
|---------------------------------------------------------------------------------|--------|
| Collagenase 3                                                                   | CCL2   |
| Beta-secretase                                                                  | blaZ   |
| Peroxisome proliferator activated receptor delta                                | CHRM2  |
| Mitogen-activated protein kinase 14                                             | MET    |
| Transcription factor AP-1                                                       | RXRB   |
| C-C motif chemokine 2                                                           | KCNMA1 |
| Interleukin-1 beta                                                              | NR3C1  |
| Mitogen-activated protein kinase 3                                              | HRH1   |
| Glycogen synthase kinase-3 beta                                                 | GABRA1 |
| E-selectin                                                                      | camC   |
| Myeloperoxidase                                                                 | R      |
| Cell division control protein 2 homolog                                         | CALM1  |
| Tissue-type plasminogen activator                                               | RXRA   |
| Gap junction alpha-1 protein                                                    | EGLN1  |
| Vascular cell adhesion protein 1                                                | PON1   |
| Stromelysin-1                                                                   | PTGS1  |
| Heat shock protein HSP 90                                                       | GABRE  |
| Thrombomodulin                                                                  | PIM1   |
| Tissue factor                                                                   | RB1    |
| Neutrophil collagenase                                                          | MAPK14 |
| NAD(P)H dehydrogenase [quinone] 1                                               | 17     |
| Cell division protein kinase 2                                                  | PKIA   |
| Phosphatidylinositol-4,5-bisphosphate 3-kinase catalytic subunit, gamma isoform | CHRM4  |
| Beta-lactamase                                                                  | ADRB2  |
| Leukotriene A-4 hydrolase                                                       | GSTM2  |
| Amine oxidase [flavin-containing] B                                             | MAOA   |
| Amine oxidase [flavin-containing] A                                             | ADRA2C |
| Xanthine dehydrogenase/oxidase                                                  | SLC6A2 |
| Cell division protein kinase 4                                                  | F7     |
| Neuronal acetylcholine receptor protein, alpha-7 chain                          | NR3C2  |
| Prostaglandin E2 receptor EP3 subtype                                           | MT-ND6 |
| Serine/threonine-protein kinase mTOR                                            | NCOA2  |
| Superoxide dismutase [Cu-Zn]                                                    | PTGS2  |
| Cytochrome P450 3A4                                                             | CDK4   |
| Cellular tumor antigen p53                                                      | CASP7  |
| Serine/threonine-protein kinase Chk1                                            | NCOA1  |
| Amyloid beta A4 protein                                                         | MAOB   |
| mRNA of PKA Catalytic Subunit C-alpha                                           | INSR   |
| Mitogen-activated protein kinase 8                                              | IGHG1  |
| Cytochrome P450 1A2                                                             | CDK2   |
| Alcohol dehydrogenase 1B                                                        | ACACA  |
| Alcohol dehydrogenase 1C                                                        | ADH1B  |
| Collagen alpha-1(I) chain                                                       | katB   |



|                                                                        |         |
|------------------------------------------------------------------------|---------|
| Glutathione S-transferase P                                            | FASN    |
| Pro-epidermal growth factor                                            | MPO     |
| Catalase                                                               | SHV-7   |
| Vascular endothelial growth factor A                                   | SCN5A   |
| NADPH--cytochrome P450 reductase                                       | MAP2    |
| Estrogen sulfotransferase                                              | DRD2    |
| Retinoic acid receptor RXR-beta                                        | NOS3    |
| Placenta growth factor                                                 | CHRM5   |
| Cytochrome P450-cam                                                    | TP53    |
| Lysozyme                                                               | PYGM    |
| Ig gamma-1 chain C region                                              | SLC6A2  |
| NADH-ubiquinone oxidoreductase chain 6                                 | MGAM    |
| DNA topoisomerase 1                                                    | MMP13   |
| Ferrichrome-iron receptor                                              | DPP4    |
| DNA gyrase subunit B                                                   | COL3A1  |
| 3-hydroxy-3-methylglutaryl-coenzyme A reductase                        | HMGCR   |
| Chymotrypsinogen B                                                     | katA    |
| Heme oxygenase 1                                                       | GABRG3  |
| Nicotinate-nucleotide--dimethylbenzimidazole phosphoribosyltransferase | MAPK3   |
| Collagen alpha-1(III) chain                                            | CTSD    |
| Retinoblastoma-associated protein                                      | cobT    |
| ATP synthase subunit beta, mitochondrial                               | GOT1    |
| Trypsin-1                                                              | CHEK1   |
| Glutathione S-transferase Mu 1                                         | ESR2    |
| 78 kDa glucose-regulated protein                                       | MMP2    |
| Proto-oncogene serine/threonine-protein kinase Pim-1                   | MMP8    |
| Prostatic acid phosphatase                                             | CHRNA2  |
| Cyclin-A2                                                              | CDK1    |
| Sterol O-acyltransferase 1                                             | PTGER3  |
| Aryl hydrocarbon receptor                                              | ALOX5   |
| Glutamate receptor 2                                                   | SELE    |
| Aldo-keto reductase family 1 member C1                                 | ADH1C   |
| Nuclear receptor coactivator 2                                         | ABCC1   |
| Nuclear receptor coactivator 1                                         | ACACA   |
| Gamma-aminobutyric-acid receptor subunit alpha-6                       | DRD1    |
| Gamma-aminobutyric acid receptor subunit gamma-3                       | gyrB    |
| Egl nine homolog 1                                                     | CYP1A2  |
| 7-dehydrocholesterol reductase                                         | HSPA5   |
| Caspase-7                                                              | blaB    |
| cAMP-dependent protein kinase inhibitor alpha                          | ampC    |
| Cytochrome c                                                           | CRK2    |
| Glutathione S-transferase Mu 2                                         | SULT1E1 |
| Calcium-activated potassium channel subunit alpha 1                    | ampC    |
| Calmodulin                                                             | ampC    |

|                                                                         |       |
|-------------------------------------------------------------------------|-------|
| Gamma-aminobutyric acid receptor subunit epsilon                        | gyrB  |
| Serine/threonine-protein phosphatase 2B catalytic subunit alpha isoform | ODC1  |
| Interleukin-2                                                           | GRIA2 |
| Microtubule-associated protein 2                                        | HSP90 |

---
